# Supplementary material for: Changes in job satisfaction among doctors in Norway from 2010 to 2017: a study based on repeated surveys
Source: PubMed Central journal article supplement — BMJ Open. 2019 Sep 8;9(9):e027891. doi: 10.1136/bmjopen-2018-027891 (PMC6738724; doi:10.1136/bmjopen-2018-027891), 2019-09-08
Supplement: bmjopen-2018-027891.draft_revisions.pdf [file bmjopen-2018-027891.draft_revisions.pdf]

# BMJ Open

BMJ Open is committed to open peer review. As part of this commitment we make the peer review history of every article we publish publicly available.

When an article is published we post the peer reviewers' comments and the authors' responses online. We also post the versions of the paper that were used during peer review. These are the versions that the peer review comments apply to.

The versions of the paper that follow are the versions that were submitted during the peer review process. They are not the versions of record or the final published versions. They should not be cited or distributed as the published version of this manuscript.

BMJ Open is an open access journal and the full, final, typeset and author-corrected version of record of the manuscript is available on our site with no access controls, subscription charges or pay-per-view fees (<http://bmjopen.bmj.com>).

If you have any questions on BMJ Open's open peer review process please email [info.bmjopen@bmj.com](mailto:info.bmjopen@bmj.com)

# BMJ Open

## Norwegian doctors still happy? Job satisfaction among Norwegian doctors 2010 – 2017 based on repeated surveys

|                               |                                                                                                                                                                                              |
|-------------------------------|----------------------------------------------------------------------------------------------------------------------------------------------------------------------------------------------|
| Journal:                      | <i>BMJ Open</i>                                                                                                                                                                              |
| Manuscript ID                 | bmjopen-2018-027891                                                                                                                                                                          |
| Article Type:                 | Research                                                                                                                                                                                     |
| Date Submitted by the Author: | 12-Nov-2018                                                                                                                                                                                  |
| Complete List of Authors:     | Rosta, Judith; Institute for Studies of the Medical Profession<br>Aasland, Olaf; Institute for Studies of the Medical Profession<br>Nylenna, Magne; The Norwegian Institute of Public Health |
| Keywords:                     | Organisation of health services < HEALTH SERVICES ADMINISTRATION & MANAGEMENT, job satisfaction, doctors, Norway, repeated surveys                                                           |
|                               |                                                                                                                                                                                              |

SCHOLARONE™  
Manuscripts

1  
2  
3  
4 1 Submission to BMJ Open  
5  
6 2  
7  
8

9 3 **Norwegian doctors still happy?**

10  
11  
12 4 **Job satisfaction among Norwegian doctors 2010 – 2017 based on**  
13  
14  
15 5 **repeated surveys**  
16  
17  
18 6

19  
20 7 **Judith Rosta**, PhD, senior researcher (1)  
21

22 8 **Olaf G. Aasland**, MD, MHA, senior researcher (1)  
23

24 9 **Magne Nylenna**, MD, PhD, professor (2,3)  
25  
26  
27 10

28  
29 11 **Affiliations:** (1) Institute for Studies of the Medical Profession, Oslo, Norway; (2) Institute of Health  
30 and Society, University of Oslo, Norway; (3) The Norwegian Institute of Public Health, Oslo, Norway  
31  
32  
33 13

34  
35 14 **Word count:** 3407

36 15 **Number of tables:** 3

37 16 **Number of figures:** 2

38 17 **Keywords:** Job satisfaction, doctors, Norway, repeated surveys  
39  
40  
41 18

42  
43 19  
44 20 **Corresponding author**

45  
46 21 **Name:** Judith Rosta

47  
48 22 **Institute:** Institute for Studies of the Medical Profession, NMA

49 23 **Street:** Akersgata 2,

50  
51 24 **Postal code:** 0107

52 25 **City:** Oslo

53  
54 26 **Country:** Norway

55  
56 27 **Email:** [judith.rosta@legeforeningen.no](mailto:judith.rosta@legeforeningen.no)  
57  
58  
59  
60

1  
2  
3 1 **ABSTRACT**

4  
5 2 **OBJECTIVE**

6  
7 3 To assess job satisfaction for different categories of Norwegian doctors from 2010 to 2016-17.

8  
9 4 **DESIGN**

10  
11 5 Cross sectional surveys in 2010, 2012, 2014 and 2016-17 of partly overlapping samples.

12  
13 6 **SETTING**

14  
15 7 Norway from 2010 to 2016-17.

16  
17 8 **PARTICIPANTS**

18  
19 9 Doctors in different job categories. Response rates were 67% (1014/1520) in 2010, 71% (1279/1792)  
20  
21 in 2012, 75% (1158/1545) in 2014 and 73% (1604/2195) in 2016-17. The same 548 doctors responded  
22  
23 at all four points in time.

24  
25 12 **MAIN OUTCOME MEASURE**

26  
27 13 Job Satisfaction Scale (JSS), a 10-item validated instrument, with sum scores ranging from 1 (low  
28  
29 satisfaction) to 7 (high satisfaction).

30  
31 15 **ANALYSIS**

32  
33 16 GLM, controlling for gender and age, and paired t-tests.

34  
35 17 **RESULTS**

36  
37 18 For all doctors, the mean scores of JSS decreased significantly from 5.52 (95% confidence interval  
38  
39 5.42 to 5.61) in 2010 to 5.30 (5.22 to 5.38) in 2016-17. The decrease was significant for GPs (5.54,  
40  
41 5.43 to 5.65 vs. 5.17, 5.07 to 5.28) and doctors in hospital (5.14, 5.07 to 5.21 vs. 5.00, 4.94 to 5.06).  
42  
43 Private practice specialists were most satisfied, followed by GPs and hospital doctors. The difference  
44  
45 between the GPs and the private practice specialists increased over time.

46  
47 23 **CONCLUSIONS**

48  
49 24 From 2010 to 2016-17 job satisfaction for Norwegian doctors decreased, but it was still at a relatively  
50  
51 high level. Several small and large health care reforms and regulations over the last decade and  
52  
53 changes in professional culture may explain some of the reduced satisfaction.  
54  
55

56  
57 28 **KEYWORDS:** Job satisfaction, doctors, Norway, repeated surveys  
58  
59  
60

1  
2  
3  
4  
5  
6  
7  
8  
9  
10  
11  
12  
13  
14  
15  
16  
17  
18  
19  
20  
21  
22  
23  
24  
25  
26  
27  
28  
29  
30  
31  
32  
33  
34  
35  
36  
37  
38  
39  
40  
41  
42  
43  
44  
45  
46  
47  
48  
49  
50  
51  
52  
53  
54  
55  
56  
57  
58  
59  
60

1     **Strengths and limitations of the study**

2     The study describes changes in job satisfaction among doctors in Norway from 2010 to 2016-17.

3

4     The data allow for generalisation to the whole doctor workforce in Norway.

5

6     Analyses are based on self-reported questionnaire data with the possibility of both over- and  
7     underestimation.

8

9

For peer review only

## 1 INTRODUCTION

2  
3  
4  
5  
6  
7  
8  
9  
10  
11  
12  
13  
14  
15  
16  
17  
18  
19  
20  
21  
22  
23  
24  
25  
26  
27  
28  
29  
30  
31  
32  
33  
34  
35  
36  
37  
38  
39  
40  
41  
42  
43  
44  
45  
46  
47  
48  
49  
50  
51  
52  
53  
54  
55  
56  
57  
58  
59  
60

1 In spite of an international trend of increasing career unhappiness,<sup>1-7</sup> the job satisfaction level of  
2  
3 Norwegian doctors has been higher than in comparable countries like Germany,<sup>8,9</sup> Iceland<sup>10</sup> and the  
4  
5 US.<sup>11</sup> The satisfaction level in Norway has been stable and high from 1994 to 2002<sup>12</sup> and even  
6  
7 increasing from 2000 to 2006.<sup>13</sup> General practitioners have at all points in time been significantly more  
8  
9 satisfied than hospital doctors.<sup>13,14</sup>

10  
11  
12  
13  
14  
15  
16  
17  
18  
19  
20  
21  
22  
23  
24  
25  
26  
27  
28  
29  
30  
31  
32  
33  
34  
35  
36  
37  
38  
39  
40  
41  
42  
43  
44  
45  
46  
47  
48  
49  
50  
51  
52  
53  
54  
55  
56  
57  
58  
59  
60

1 Doctor wellness is crucial to the delivery of good health care and has been identified as a missing  
2  
3 quality indicator.<sup>15</sup> Satisfaction is a substantial element of professional wellness and has as such  
4  
5 become a key performance indicator in quality systems.<sup>16</sup> While a high level of job satisfaction is  
6  
7 associated with positive outcomes, doctors' job discontent may become a threat to the quality of  
8  
9 patient care and safety, on an individual level as well as on a system level.<sup>17-21</sup>

10  
11  
12  
13  
14  
15  
16  
17  
18  
19  
20  
21  
22  
23  
24  
25  
26  
27  
28  
29  
30  
31  
32  
33  
34  
35  
36  
37  
38  
39  
40  
41  
42  
43  
44  
45  
46  
47  
48  
49  
50  
51  
52  
53  
54  
55  
56  
57  
58  
59  
60

1 Doctors' job satisfaction is related to work load, healthcare organization and management,  
2  
3 professional autonomy, the ability to provide high quality health care, and financial systems including  
4  
5 personal income.<sup>22-25</sup> The impact of changes in health politics and health care reforms has been  
6  
7 insufficiently explored.

8  
9  
10  
11  
12  
13  
14  
15  
16  
17  
18  
19  
20  
21  
22  
23  
24  
25  
26  
27  
28  
29  
30  
31  
32  
33  
34  
35  
36  
37  
38  
39  
40  
41  
42  
43  
44  
45  
46  
47  
48  
49  
50  
51  
52  
53  
54  
55  
56  
57  
58  
59  
60

1 Several organizational reforms have been introduced in Norwegian health care during the first two  
2  
3 decades of the 21<sup>st</sup> century. A coordination reform from 2012 to improve the collaboration between  
4  
5 specialist (secondary) and municipal (primary) health care levels has laid more responsibility for  
6  
7 patients on the local communities. This has resulted in an increased workload on general  
8  
9 practitioners.<sup>26</sup> More duties for primary care has not been compensated by corresponding  
10  
11 strengthening in resources and staffing, and a need for more GPs and a revision of the funding system  
12  
13 has recently been voiced.<sup>27</sup>

1  
2  
3 1 This paper reports the development of job satisfaction among Norwegian doctors from 2010 to 2016-  
4  
5 2 17 with special emphasize on general practitioners and a possible effect of the latest reforms.  
6  
7 3  
8  
9 4

## 11 5 **MATERIALS AND METHODS**

### 13 6 **Participants and ethical approval**

15 7 A reference panel of Norwegian doctors was established in 1994 by the Institute for Studies of the  
16  
17 8 Medical Profession (LEFO, [www.legeforsk.org](http://www.legeforsk.org)). It constitutes approximately 1,600 practising doctors  
18  
19 9 who have agreed to answer postal questionnaires every second year. Doctors who leave the panel,  
20  
21 10 usually due to retirement, are replaced by young doctors, and the sample's representative structure is  
22  
23 11 maintained.<sup>28 29</sup> This article is mainly based on data from 2010, 2012, 2014 (partly in 2015) and 2016  
24  
25 12 (partly in 2017).  
26  
27  
28  
29  
30  
31  
32  
33  
34  
35  
36

37 14 Exemption from ethical approval for each repeated survey is granted from the Regional Committee for  
38  
39 15 Medical Research Ethics (IRB 0000 1870).  
40  
41  
42  
43  
44  
45  
46  
47  
48  
49  
50

### 51 17 **Dependent variable**

52 18 *Job satisfaction* was measured with a modified version of the "Job Satisfaction Scale" by Warr, Cook  
53  
54 19 and Wall.<sup>30</sup> It consists of the following ten items scored on a Likert scale from 1 (very dissatisfied) to  
55  
56 20 7 (very satisfied):  
57  
58  
59  
60

21 How satisfied are you with:

22 (1) The amount of responsibility you are given

23 (2) Variation of work

24 (3) Your colleagues and fellow workers

25 (4) Your physical work conditions

26 (5) Your opportunities to use your skills

27 (6) Your overall job situation

28 (7) The freedom to choose your own methods of working

- 1  
2  
3 1 (8) The recognition you get for good achievements  
4  
5 2 (9) Your rate of pay  
6  
7 3 (10) Your work hours  
8  
9 4 A mean unweighted sum score ranging from 1 to 7 is calculated.  
10  
11  
12

## 13 6 **Independent variables**

15 7 *Job positions* have been categorised into the following groups:

- 18 8 (a) Doctors in hospital: doctors in management positions (medical superintendent, head of department,  
19 chief senior consultant, head of unit, senior consultant, head of section), senior hospital consultants  
20 9 and specialty registrars.  
21  
22 11 (b) General practitioners  
23  
24 12 (c) Specialists working in private practice  
25  
26 13 (d) Doctors in academia: professor, associate professor, research fellow, and researcher  
27  
28 14 (e) Community medical officers: district medical officer, senior district medical, officer, nursing home  
29 15 medical officer, visiting medical officer, doctor at infant welfare clinic, community general  
30 16 practitioner  
31  
32 17 (f) Doctors in administrative positions: county medical officer, medical advisor, chief medical officer  
33  
34 18 (g) Other key job categories  
35  
36 19 Other independent variables were *gender* and *age*.  
37  
38  
39  
40  
41  
42  
43  
44

## 45 21 **Analysis**

47 22 The distribution of JSS is close to normal (Kolmogorov-Smirnov test 0.56,  $p < 0.001$ ) with a slightly  
48 23 negative skewness (-0.62). Thus the use of parametric tests is unproblematic. General Linear  
49 24 modelling (GLM) controlled for gender and age was used to estimate the means of job satisfaction at  
50 25 the four points in time: 2010, 2012, 2014, and 2016-17. Statistically significant differences are  
51 26 assumed when the 95% confidence intervals are not overlapping.  
52  
53  
54  
55  
56  
57  
58  
59  
60 28 Paired t-tests are used to show individual differences between two points in time.



1  
2  
3 1  
4  
5 2 Since interns were only identified in data from 2016-17, this category is excluded in this paper.  
6  
7 3

8  
9 4 Three different samples are analysed. The first consists of all respondents at all times. The second  
10  
11 5 sample comprises doctors with defined job positions in one of four categories: GPs, specialists in  
12  
13 6 private practice, hospital doctors or doctors in academia in minimum one survey. The third,  
14  
15 7 *longitudinal* sample are the doctors who responded at all four points in time. A subsample here are the  
16  
17 8 doctors who did not change job position during the observational period.  
18  
19 9

20  
21  
22 10 Units with missing data were excluded. Predictive Analytics Software Statistics 25 was used for the  
23  
24 11 analyses.  
25  
26 12

### 27 28 13 **Patient and public involvement**

29  
30 14 No patients were involved in setting the research question or the outcome measures, nor were they  
31  
32 15 involved in the design and implementation of the study. There are no plans to involve patients in  
33  
34 16 dissemination.  
35  
36 17

## 37 38 39 18 40 41 19 **RESULTS**

### 42 43 20 **Respondents**

44  
45 21 Table 1 shows the sample, number of respondents, response rates and the makeup of job positions for  
46  
47 22 which we have data on JSS, gender and age: 946 in 2010, 1161 in 2012, 1056 in 2014 and 1290 in  
48  
49 23 2016-17. The majority of respondents worked in hospitals.  
50  
51 24

52  
53 25 Table 1

54  
55 26  
56  
57 27 The proportion of females increased from 37.4% (95 % CI 34.3 to 40.5) in 2010, to 43.4% (40.6 to  
58  
59 28 46.3) in 2012, was 42.5% (39.5 to 45.5) in 2014 and increased further to 52.9% (50.3 to 55.5) in 2016-

1  
2  
3 1 17. The mean age was 50.7 (95% CI 49.9 to 51.6) years in 2010, 49.7 (48.9 to 50.4) years in 2012,  
4  
5 2 50.5 (49.7 to 51.3) years in 2014 and 47.7 (46.9 to 48.4) years in 2016-17.  
6  
7 3

8  
9 4 The representativity of the data for 2010, 2012 and 2014 is described elsewhere.<sup>29</sup> Data for 2016-17  
10  
11 5 are comparable with the Norwegian doctors workforce in 2016 regarding age, gender and job  
12  
13 6 positions, but with a slightly higher percentage of females, and doctors in academia (data not shown).  
14  
15 7

16  
17 8 548 doctors responded at all four time points, 202 (37%) females. Mean age in 2010 was 48.1 years.  
18  
19 9 64.8% (355/548) were stable in their jobs over the period: 233 hospital doctors, 94 GPs, 22 private  
20  
21 10 practice specialists and 6 doctors in academia. Due to the low number of doctors in academia, this  
22  
23 11 group is excluded in some of the analyses.  
24  
25 12

### 26 27 28 13 **Changes in job satisfaction**

#### 29 30 14 *All doctors*

31  
32 15 The estimated mean of job satisfaction, controlled for gender, age and job position for all respondents  
33  
34 16 in 2016-17, was 5.30, (95% CI 5.22 to 5.38), which is significantly lower than in 2010 (5.52, 5.42 to  
35  
36 17 5.61), and nearly significant in 2012 (5.45, 5.37 to 5.54) and 2014 (5.44, 5.35 to 5.53).  
37  
38 18

#### 39 40 19 *Doctors in different job positions*

41  
42 20 Over the whole period, the mean score of job satisfaction decreased for GPs and for hospital doctors.  
43  
44 21 Private practice specialists were the most satisfied, while hospital doctors were least satisfied. No  
45  
46 22 differences were found between GPs and doctors in academia. Job satisfaction generally increased  
47  
48 23 from 2012 to 2014 and decreased from 2014 to 2016-17 for GPs, private practice specialists and  
49  
50 24 hospital doctors. In 2016-17, GPs reported significantly higher satisfaction than hospital doctors, and  
51  
52 25 significantly lower satisfaction than private practice specialists.  
53  
54 26

55  
56  
57 27 Figure 1 with table  
58  
59 28  
60

1  
2  
3 1 From 2010 to 2016-17 there was a non-significant decrease in JSS for other job positions like  
4  
5 2 community medical officers (5.59, 95% CI 5.26 to 5.91 vs. 5.33, 5.10 to 5.56), doctors in  
6  
7 3 administration (5.75, 5.38 to 6.12 vs. 5.39, 5.08 to 5.71) and doctors in other positions (5.61, 5.32 to  
8  
9 4 5.89 vs. 5.23, 4.99 to 5.46).

### 6 *Effect of age, gender and specialty on estimated means of JSS*

7 There were no gender differences. JSS increased with increasing age. Among hospital doctors, JSS did  
8 not vary significantly over time across medical specialties (data not shown).

### 10 **Changes in JSS in the longitudinal sample**

#### 11 *All doctors*

12 Using paired sample t-tests, JSS scores were found to increase non-significantly from 2010 to 2012  
13 (5.30 vs. 5.34;  $t=1.43$ ;  $p=0.152$ ), to increase significantly from 2012 to 2014 (5.34 vs. 5.41;  $t=2.19$ ;  
14  $p=0.029$ ) and to decrease significantly from 2014 to 2016-17 (5.41 vs. 5.34;  $t=-2.03$ ;  $p=0.043$ ).

#### 16 *Hospital doctors, GPs and private practice specialists*

17 From 2010 to 2016-17, the JSS scores for GPs decreased steadily. For specialists in private practice  
18 and for hospital doctors it increased from 2010 to 2014, and decreased from 2014 to 2016-17. At any  
19 point in time, private practice specialists were the most satisfied. GPs were more satisfied than  
20 hospital doctors, but the difference between these groups decreased.

22 Figure 2

### 24 **Changes on the item level**

25 For GPs and doctors in hospital, the item scores on "freedom to choose methods", "recognition for  
26 good work", "rate of pay" and "work hours" decreased significantly from 2010 to 2016-17. Also, GPs  
27 reported significantly lower scores for "amount of responsibility" and "overall JSS". The same pattern

1 was found in the longitudinal sample, although not statistically significant. No significant changes on  
2 the item level were found for private practice specialists and for doctors in academia.

3  
4  
5  
6  
7  
8  
9  
10  
11  
12  
13  
14  
15  
16  
17  
18  
19  
20  
21  
22  
23  
24  
25  
26  
27  
28  
29  
30  
31  
32  
33  
34  
35  
36  
37  
38  
39  
40  
41  
42  
43  
44  
45  
46  
47  
48  
49  
50  
51  
52  
53  
54  
55  
56  
57  
58  
59  
60

Table 3

## DISCUSSION

### Main findings

From 2010 to 2016-17, JSS remained high among Norwegian doctors, but with a decreasing trend.

The decrease was statistically significant for GPs and for hospital doctors. Private practice specialists were most satisfied, followed by GPs and hospital doctors. The difference between the GPs and the private practice specialist increased over time. Of the ten JSS items "working hours", "payment", "recognition for good work" and "freedom to choose methods of work" declined significantly, both among GPs and hospital doctors, while no significant changes were found for specialists in private practice and doctors in academia.

### Strengths and limitations

The study's main strength is that it allows for generalisation to the whole population of doctors in Norway. Similarities in survey methods and repeated measures should also be pointed out.

Furthermore, the response rates were fairly good, ranging from 67% and 75%, which are higher than for other surveys of the medical profession, but do not rule out the possibility of non-response bias.<sup>29</sup>

However, analyses in Table 2 and 3 show no significant differences in the JSS scores between the longitudinal and the total sample. The Warr-Cook-Wall scale for job satisfaction was not specifically designed for doctors, but it has been validated<sup>30</sup> and used extensively in doctor populations both in Norway and elsewhere.<sup>8-11 13 14</sup>

### Comparison with other studies

Differences in methodology limit direct comparisons with other studies. However, it is possible to point out some international trends in job satisfaction; older doctors report higher job satisfaction, and

1  
2  
3 1 there are no gender differences.<sup>9 12 14 31</sup> Age changes in satisfaction are related to the lowered  
4  
5 2 expectations over time, higher remuneration, higher perceived autonomy and more experience.<sup>13 32 33</sup>  
6  
7 3  
8  
9 4 In Norway, JSS was stable and high from 1994 to 2002,<sup>12</sup> increased from 2000 to 2006,<sup>13</sup> and  
10  
11 5 decreased from 2010 to 2016-17. However, it was still at a relatively high level in 2016-17 higher than  
12  
13 6 in 2000, 2002, 2004 and lower than in 2006.<sup>12</sup> Longitudinal studies on doctors' job satisfaction are few  
14  
15 7 and show a mixed pattern. A study on doctors' intention to work in the UK suggested a decrease in  
16  
17 8 their satisfaction. The fraction of UK-trained doctors who would "probably not" or "definitely not"  
18  
19 9 practice medicine in the UK increased from 8% in 1996-2011 to 15% in 2015.<sup>3</sup> Decreasing  
20  
21 10 professional satisfaction were also described among doctors in the UK and US.<sup>1 2 4</sup> On the other hand,  
22  
23 11 increased satisfaction with work has been reported from doctors in the Netherlands from 2000 to  
24  
25 12 2009<sup>34</sup> and from six graduation cohorts from 1996 to 2012 in the UK.<sup>35</sup> High levels of job satisfaction  
26  
27 13 were documented from emergency medicine residents in the US,<sup>36</sup> family physicians in Canada,<sup>37</sup>  
28  
29 14 primary care physicians in Germany,<sup>38</sup> and Australia.<sup>39</sup>  
30  
31  
32  
33  
34  
35 16 Norwegian studies show statistically significant higher job satisfaction for GPs than for hospital  
36  
37 17 doctors from 2000 to 2006 and in 2008, and no significant differences between GPs and private  
38  
39 18 practice specialist in 2008.<sup>13 14</sup> In our study, JSS decreased significantly for GPs and hospital doctors,  
40  
41 19 but GPs continued with higher scores than their hospital colleagues. GPs and private practice  
42  
43 20 specialists had similar levels of satisfaction in 2010, while the scores were significantly higher for  
44  
45 21 private practice specialist in 2012, 2014 and 2016-17 (Figure 1 with table).  
46  
47  
48  
49  
50 23 Decline in GPs job satisfaction seems to be the rule all over the world. A Danish study shows that the  
51  
52 24 proportion of GPs reporting dissatisfaction with work increased from 6% in 2012 to 22% in 2016.  
53  
54 25 Significant increase in dissatisfaction was found for "working hours", "rate of pay", "freedom to  
55  
56 26 choose methods" and "recognition for good work".<sup>6</sup> The National GP Worklife Survey in the UK  
57  
58 27 documents that satisfaction with "colleagues and fellow workers" improved, while the other nine  
59  
60 28 aspects of job declined from 2010 to 2017. The largest decrease were "working hours", "rate of pay"

1 and "amount of responsibility".<sup>5</sup> The MABEL survey among doctors in Australia also shows a decline  
2 from 2013 to 2015 in GPs job satisfaction.<sup>7</sup>

3  
4 According to a recent systematic review on satisfaction of doctors working in hospitals within the  
5 European Union, hospital doctors had a moderate job satisfaction; 4.81 on a scale from 1 to 7.<sup>40</sup> In our  
6 sample, doctors in hospital reported higher levels of satisfaction: 5.14 in 2010 and 5.00 in 2016-17.

7  
8 In the Norwegian "Working environment and living conditions survey" top managers,  
9 farmers/fisherman or physiotherapists report a higher level and nurses, policeman or customer service  
10 occupations a lower level of satisfaction than the doctors.<sup>41</sup>

## 11 12 **Explanation of results**

13 Health care organisations and financial systems are constantly subject to change in most countries.  
14 Studies document that changes in the healthcare organisation may influence the doctors' work-life and  
15 professional satisfaction.<sup>42 43</sup> Two important reforms have been introduced in Norway in the beginning  
16 of the 21 century: "The Regular General Practitioners Scheme" in 2001 and "The Hospital Reform" in  
17 2002. The Regular General Practitioners Scheme introduced a "list-patient" system whereby all  
18 inhabitants in Norway can voluntarily sign on to the list of a general practitioner of their choice. This  
19 reform aimed at enhancing access to general practitioners and continuity in the patient-doctor  
20 relationship. The implementation of the "list-patient" system has modified the structure of GPs'  
21 remuneration into a combination of government-funded capitation payment according to the number  
22 of patients on the list from the municipals, the fee-for-service from the National Insurance System and  
23 the direct payment of the patients. The Hospital Reform transferred the ownership of hospitals and  
24 specialist health services from the county level to the central government, and hospitals were  
25 organised as health enterprises. A previous study based on data from 2000 to 2006 showed that job  
26 satisfaction increased and that the comprehensive reforms in the Norwegian health-care system did not  
27 influence negatively the job satisfaction for all doctors and particularly for hospital doctors and GPs.<sup>13</sup>

1  
2  
3 1 Three new major health care reforms have been implemented over the last decade in Norway. "The  
4  
5 2 Coordination Reform" in 2012, aims at better collaboration between primary (municipal) and  
6  
7 3 secondary (specialist) health care services,<sup>44</sup> "The Free Choice of Hospital Reform" in 2015 gives the  
8  
9 4 users a free choice of hospital,<sup>45</sup> and the white paper on "The Future Primary Care – Proximity and  
10  
11 5 Comprehensiveness" in 2015 aiming to improve user involvement, availability, prevention, proactivity  
12  
13 6 and collaboration between multidisciplinary teams.<sup>46</sup>

14  
15  
16 7  
17  
18 8 These reforms are challenging for the doctors, and may explain some of the reduction in satisfaction.  
19  
20 9 Studies show that high professional autonomy yields better quality of health care and more doctor  
21  
22 10 satisfaction.<sup>25 47</sup> More time spent on direct patient care and less time spent on administrative tasks, and  
23  
24 11 optimal economic conditions in general are also important positive contributors to job satisfaction.<sup>8 48</sup>  
25  
26 12 <sup>49</sup> A study based on data from 1994 to 2014 shows that the total weekly working hours remained  
27  
28 13 unchanged for most doctors in Norway, while time spent on direct patient care has decreased,  
29  
30 14 particularly for hospital doctors.<sup>29</sup> Another study with data from 2018 documents long working weeks  
31  
32 15 with a wide variety of tasks among GPs.<sup>50</sup> 70% of doctors experienced stress in association with  
33  
34 16 perpetual reorganisations of the national health care system, particularly hospital doctors.<sup>42</sup> A recent  
35  
36 17 survey on hospital doctors' working conditions documents that hospital doctors score high on items  
37  
38 18 related to engagement at work, assessment of work as meaningful and cooperation with colleagues,  
39  
40 19 but lower on items related to workload and professional autonomy (including openness, participation  
41  
42 20 in decision making, dialogue with the hospital management).<sup>51</sup> In another recent survey on GPs'  
43  
44 21 working conditions,<sup>52</sup> GPs reported that they have a meaningful job with various interesting tasks.  
45  
46 22 However, they also reported considerable growth both in work demand and in cost of running their  
47  
48 23 own medical office during the last decade. The high work demand were related to increased transfer of  
49  
50 24 tasks that were previously conducted by outpatient clinics or hospitals, for example follow-up care of  
51  
52 25 pregnant women or patients with chronic diseases like cancer, rheumatic diseases, endocrinological  
53  
54 26 disease, substance abuse or some mental health disorders. In addition, there were increases in  
55  
56 27 consultations, laboratory services for appointment specialists, tasks related to preventive treatment and  
57  
58 28 documentation as well as certification requirements.<sup>52 53</sup>

1  
2  
3 1  
4  
5 2 These findings fit well with our data where several aspects of satisfaction declined significantly. For  
6  
7 3 GPs, the largest decrease was in "amount of responsibility given" followed by "work hours",  
8  
9 4 "recognition for good clinical work", "rate of pay", "overall job satisfaction", and "freedom to choose  
10  
11 5 methods of work". For hospital doctors, the decrease was largest in "freedom to choose methods of  
12  
13 6 work" followed by "rate of pay", "recognition for good clinical work" and "work hours". The high job  
14  
15 7 satisfaction of specialists in private practice probably reflects both professional and time-based  
16  
17 8 autonomy and good economic conditions.  
18  
19  
20 9

21  
22 10 In the longitudinal sample (the doctors who responded at all four points in time), there were no  
23  
24 11 significant changes neither on the item level nor on estimated JSS from 2010 to 2016-17 (Table 3). A  
25  
26 12 common tendency for GPs, hospital doctors and private practice specialist was a non-significant  
27  
28 13 decrease in job satisfaction from 2014 to 2016-17 (Figure 2). Possible reasons for this stability in JSS  
29  
30 14 may be a combination of the *adaption* of health care regulations over time and the *selection* of doctors.  
31  
32 15 The most satisfied doctors are more likely to remain in their current job position.  
33  
34  
35 16

36  
37 17 Changes in professional culture may also explain some of the reduced satisfaction. In a study among  
38  
39 18 hospital doctors in Norway, many senior consultants talked about "being a doctor" as a major part of  
40  
41 19 their "identity" and "lifestyle", while the specialty registrars were more likely to regard their work as a  
42  
43 20 "job".<sup>54</sup> In another study, most doctors were satisfied as doctors, but felt it challenging to combine the  
44  
45 21 job with leisure activities and family life. Some senior consultants were of the opinion that specialty  
46  
47 22 registrars were less willing to prioritize professional life and more concerned with their responsibilities  
48  
49 23 outside of work.<sup>55</sup>  
50

51 24  
52  
53 25 The slightly increasing trend in job satisfaction among all Norwegian doctors described from 2000 to  
54  
55 26 2006<sup>13</sup> did not continue from 2010 to 2016-17. However, the job satisfaction level was still above 5 on  
56  
57 27 a 1 to 7 scale. In surveys from 2018, GPs and hospital doctors described their work as meaningful in  
58  
59  
60



1  
2  
3 1 spite of considerable work overload.<sup>51 52</sup> This suggests that job satisfaction is also based on internal  
4  
5 2 values. To be in demand and to treat patients were also fundamental elements of doctor satisfaction.<sup>56</sup>  
6  
7 3

#### 4 **Policy implications and future research**

5 The importance of a good professional climate is emphasized in both Norwegian and European  
6  
7 6 working conditions legislature.<sup>57 58</sup> Job satisfaction for Norwegian doctors remained relatively high,  
8  
9 7 but with a downward trend over an eight year period, where the decrease was statistically significant  
10  
11 8 for GPs and hospital doctors. Variations in job satisfaction across job positions call for more separate  
12  
13 9 analyses. High job satisfaction among doctors is important. It has been found to relate positively to  
14  
15 10 doctors well-being and quality of health care.<sup>17-19 43</sup> In addition, job satisfaction is an important factor  
16  
17 11 for career decision like staying in or leaving the current job position.<sup>59</sup> Low recruitment to primary  
18  
19 12 care is a concurrent issue in media,<sup>60</sup> health administration<sup>61</sup> and research,<sup>27 62</sup> therefore better job  
20  
21 13 satisfaction is important. This could be achieved through regulation of working hours, improvement of  
22  
23 14 recognition for medical work regarding payment and feedback for good work.  
24  
25  
26  
27  
28  
29  
30  
31  
32  
33  
34  
35  
36  
37  
38  
39  
40  
41  
42  
43  
44  
45  
46  
47  
48  
49  
50  
51  
52  
53  
54  
55  
56  
57  
58  
59  
60

1  
2  
3 **1 Declarations**  
4

5  
6  
7 **3 Acknowledgements** The authors wish to thank all doctors who have supported this study by  
8  
9  
10 4 participating in the survey.  
11

12  
13  
14 **6 Contributors** JR, OGA and MN designed the study. JR undertook the literature review, did the  
15  
16  
17  
18  
19  
20  
21  
22  
23  
24  
25  
26  
27  
28  
29  
30  
31  
32  
33  
34  
35  
36  
37  
38  
39  
40  
41  
42  
43  
44  
45  
46  
47  
48  
49  
50  
51  
52  
53  
54  
55  
56  
57  
58  
59  
60  
**7** statistical analysis and wrote the first draft. OGA and MN made critical revisions. All authors had full  
**8** access to all of the data (including statistical reports and tables) and are jointly responsible for the  
**9** integrity of the data and the accuracy of the data analysis.

**11 Funding** This research received no specific grant from any funding agency in the public,  
**12** commercial, or not-for-profit sectors.

**14 Competing interest** None declared.

**16 Ethics approval** According to the Regional Committee for Medical Research Ethics, the study based  
**17** on “Norwegian Physician Survey - A bi-annual prospective questionnaire survey to a representative  
**18** sample of Norwegian physicians” is exempt from review in Norway, cf. §§ 4 of The Act. The project  
**19** can be implemented without the approval by the Regional Committee for Medical Research Ethics  
**20** (IRB 0000 1870). Additionally, approval for data protection of the bi-annual prospective survey  
**21** among Norwegian doctors was obtained from the Norwegian Social Science Data Service (Reference  
**22** 19521).

**24 Data sharing statement** The authors may be able to provide aggregated data on which the analysis is  
**25** based, on request. No additional data available.

**27 Patient consent** N/A

1  
2  
3 1 **STROBE Statement:** The authors confirm that they have followed the list of the STROBE  
4  
5 2 Statement (BMJ 2007;335:806-808).

6  
7 3  
8  
9 4 **Transparency declaration:** The lead author (Judith Rosta) affirms that the manuscript is an honest,  
10  
11 5 accurate, and transparent account of the study being reported; that no important aspects of the study  
12  
13 6 have been omitted; and that any discrepancies from the study as planned (and, if relevant, registered)  
14  
15 7 have been explained.  
16  
17 8

18  
19  
20  
21  
22  
23  
24  
25  
26  
27  
28  
29  
30  
31  
32  
33  
34  
35  
36  
37  
38  
39  
40  
41  
42  
43  
44  
45  
46  
47  
48  
49  
50  
51  
52  
53  
54  
55  
56  
57  
58  
59  
60

For peer review only

1  
2  
3 **1 Figure legends**  
4

5  
6 2

7  
8 3 Figure 1 GLM on estimated means of job satisfaction (scored from 1 to 7) controlled for  
9  
10 4 age and gender among doctors in different type of work in 2010, 2012, 2014  
11  
12 5 and 2016-17.  
13  
14 6

15  
16  
17 7 Figure 2 Paired t-test on changes of estimated means of job satisfaction (scored from 1  
18  
19 8 to 7) among doctors in different type of work that responded at all four time  
20  
21 9 points  
22  
23  
24  
25 10

1  
2  
3 **1 Table to Figure 1**  
4  
5

6 **2** Please do insert table after the Figure 1.  
7  
8

9  
10 **3**

|                                 | <b>2010</b><br>mean (95 % CI) | <b>2012</b><br>mean (95 % CI) | <b>2014</b><br>mean (95 % CI) | <b>2016-17</b><br>mean (95 % CI) |
|---------------------------------|-------------------------------|-------------------------------|-------------------------------|----------------------------------|
| General practitioners           | 5.54 (5.43-5.65)              | 5.33 (5.23-5.44)              | 5.43 (5.31-5.54)              | 5.17 (5.07-5.28)                 |
| Doctors in hospital             | 5.14 (5.07-5.21)              | 5.06 (5.00-5.12)              | 5.16 (5.09-5.23)              | 5.00 (4.94-5.06)                 |
| Specialists in private practice | 5.64 (5.42-5.86)              | 5.74 (5.52-5.95)              | 5.81 (5.59-6.03)              | 5.53 (5.29-5.77)                 |
| Doctors in academia             | 5.35 (5.14-5.56)              | 5.50 (5.30-5.70)              | 5.34 (5.12-5.55)              | 5.45 (5.23-5.66)                 |

11  
12  
13  
14  
15  
16  
17  
18  
19  
20  
21  
22  
23  
24  
25  
26  
27  
28  
29  
30  
31  
32  
33  
34  
35  
36  
37  
38  
39  
40  
41  
42  
43  
44  
45  
46  
47  
48  
49  
50  
51  
52  
53  
54  
55  
56  
57  
58  
59  
60

4

5

6

**Table 1** Sample, number of respondents, response rates and the makeup of job categories for respondents where we have data on job satisfaction, gender and age.

|         | Sample<br>(n) | Respondents <sup>(a)</sup><br>(n) | Response<br>rate<br>(%) | Job categories (n) |                        |                          |                                       |                        |                                  |                                          |                         |
|---------|---------------|-----------------------------------|-------------------------|--------------------|------------------------|--------------------------|---------------------------------------|------------------------|----------------------------------|------------------------------------------|-------------------------|
|         |               |                                   |                         | All <sup>(b)</sup> | Doctors in<br>hospital | General<br>practitioners | Specialists<br>in private<br>practice | Doctors in<br>academia | Community<br>medical<br>officers | Doctors in<br>administrative<br>position | Other job<br>categories |
| 2010    | 1 520         | 1 014                             | 66.7                    | 946                | 534                    | 219                      | 57                                    | 61                     | 24                               | 19                                       | 32                      |
| 2012    | 1 792         | 1 279                             | 71.4                    | 1 161              | 678                    | 257                      | 60                                    | 67                     | 38                               | 30                                       | 31                      |
| 2014    | 1 545         | 1 158                             | 75.0                    | 1 056              | 617                    | 223                      | 60                                    | 60                     | 38                               | 28                                       | 30                      |
| 2016-17 | 2 195         | 1 604                             | 73.1                    | 1 290              | 772                    | 263                      | 52                                    | 64                     | 55                               | 30                                       | 54                      |

(a) Number of respondents with no data on job satisfaction or gender or age or job position were 68 in 2010, 118 in 2012, 102 in 2014 and 147 in 2016-17.

(b) Since interns were only identified in data 2016-17 (n=167), this category is excluded in this paper.

**Table 2 GLM on estimated means, controlled for gender and age, of the 10 job satisfaction scale items (each scored from 1 to 7) among doctors in different type of work in 2010 and 2016/17. Statistically significant differences (95% CI does not overlap) are in bold.**

|                                  | General practitioners   |                         | Doctors in hospital     |                         | Specialists in private practice |                   | Doctors in academia |                   |
|----------------------------------|-------------------------|-------------------------|-------------------------|-------------------------|---------------------------------|-------------------|---------------------|-------------------|
|                                  | means (95 % CI)         |                         | means (95 % CI)         |                         | means (95 % CI)                 |                   | means (95 % CI)     |                   |
| Satisfied with ....              | 2010<br>(n=219)         | 2016-17<br>(n=263)      | 2010<br>(n=534)         | 2016-17<br>(n=772)      | 2010<br>(n=57)                  | 2016-17<br>(n=52) | 2010<br>(n=61)      | 2016-17<br>(n=64) |
| Amount of responsibility given   | <b>5.36 (5.19-5.53)</b> | <b>4.73 (4.57-4.90)</b> | 5.28 (5.17-5.38)        | 5.19 (5.09-5.29)        | 5.78 (5.44-6.10)                | 5.65 (5.28-6.03)  | 5.81 (5.49-6.12)    | 5.75 (5.41-6.08)  |
| Variation in work                | 5.80 (5.65-5.95)        | 5.60 (5.45-5.75)        | 5.40 (5.30-5.50)        | 5.25 (5.16-5.34)        | 5.30 (5.00-5.60)                | 5.16 (4.82-5.51)  | 5.76 (5.48-6.05)    | 5.50 (5.19-5.80)  |
| Colleagues and fellow workers    | 5.90 (5.76-6.05)        | 5.73 (5.58-5.87)        | 5.56 (5.47-5.65)        | 5.69 (5.60-5.77)        | 5.63 (5.34-5.91)                | 5.46 (5.13-5.79)  | 5.44 (5.18-5.71)    | 5.49 (5.19-5.78)  |
| Physical working conditions      | 5.60 (5.43-5.77)        | 5.47 (5.31-5.64)        | 4.81 (4.70-4.92)        | 4.77 (4.67-4.87)        | 5.52 (5.18-5.86)                | 5.32 (4.95-5.69)  | 4.76 (4.44-5.09)    | 5.15 (4.82-5.48)  |
| Opportunities to use abilities   | 5.90 (5.75-6.05)        | 5.62 (5.47-5.77)        | 5.46 (5.36-5.56)        | 5.36 (5.28-5.45)        | <b>5.79 (5.50-6.09)</b>         | 5.74 (5.40-6.08)  | 6.10 (5.82-6.38)    | 5.93 (5.62-6.23)  |
| Overall job satisfaction         | <b>5.88 (5.74-6.01)</b> | <b>5.49 (5.35-5.63)</b> | 5.51 (5.42-5.60)        | 5.40 (5.32-5.48)        | 5.94 (5.66-6.21)                | 5.86 (5.55-6.17)  | 5.84 (5.58-6.10)    | 5.78 (5.50-6.06)  |
| Freedom to choose method of work | <b>5.66 (5.50-5.82)</b> | <b>5.34 (5.18-5.49)</b> | <b>4.97 (4.87-5.07)</b> | <b>4.67 (4.58-4.76)</b> | 5.90 (5.59-6.22)                | 5.70 (5.35-6.05)  | 5.73 (5.43-6.03)    | 5.67 (5.36-5.99)  |
| Recognition for good work        | <b>5.38 (5.20-5.55)</b> | <b>4.83 (4.66-5.01)</b> | <b>4.82 (4.71-4.94)</b> | <b>4.59 (4.49-4.69)</b> | 5.50 (5.14-5.85)                | 5.41 (5.01-5.81)  | 5.26 (4.92-5.59)    | 5.20 (4.84-5.55)  |
| Rate of pay                      | <b>5.40 (5.23-5.57)</b> | <b>4.92 (4.75-5.09)</b> | <b>4.94 (4.83-5.05)</b> | <b>4.68 (4.58-4.77)</b> | 5.66 (5.32-6.00)                | 5.67 (5.29-6.04)  | 3.94 (3.62-4.27)    | 4.51 (4.17-4.85)  |
| Work hours                       | <b>4.56 (4.37-4.74)</b> | <b>4.00 (3.82-4.18)</b> | <b>4.61 (4.49-4.73)</b> | <b>4.38 (4.27-4.48)</b> | 5.41 (5.04-5.78)                | 5.34 (4.93-5.75)  | 4.86 (4.50-5.21)    | 5.49 (5.13-5.86)  |
| JSS                              | <b>5.54 (5.43-5.65)</b> | <b>5.17 (5.07-5.28)</b> | <b>5.14 (5.07-5.21)</b> | <b>5.00 (4.94-5.06)</b> | 5.64 (5.42-5.86)                | 5.53 (5.29-5.77)  | 5.35 (5.14-5.56)    | 5.45 (5.23-5.66)  |

**Table 3 GLM on estimated means, controlled for gender and age, of the ten JSS items (each scored from 1 to 7) among doctors in different type of work in the longitudinal sample in 2010 and 2016/17. Statistically significant differences (95% CI do not overlap) are in bold.**

|                                  | General practitioners |                         | Specialists in private practice |                    | Doctors in hospital |                   |
|----------------------------------|-----------------------|-------------------------|---------------------------------|--------------------|---------------------|-------------------|
|                                  | means (95 % CI)       |                         | means (95 % CI)                 |                    | means (95 % CI)     |                   |
| <b>Satisfied with ....</b>       | 2010<br>(n=94)        | 2016-17<br>(n=94)       | 2010<br>(n=233)                 | 2016-17<br>(n=233) | 2010<br>(n=22)      | 2016-17<br>(n=22) |
| Amount of responsibility given   | 5.35 (5.09-5.61)      | <b>4.87 (4.57-5.18)</b> | 5.35 (5.20-5.50)                | 5.21 (5.03-5.39)   | 5.96 (5.55-6.36)    | 5.82 (5.18-6.46)  |
| Variation in work                | 5.84 (5.61-6.07)      | 5.92 (5.73-6.10)        | 5.41 (5.27-5.55)                | 5.44 (5.29-5.59)   | 5.05 (4.91-5.48)    | 5.27 (4.72-5.83)  |
| Colleagues and fellow workers    | 5.95 (5.74-6.16)      | 5.87 (5.67-6.08)        | 5.63 (5.50-5.77)                | 5.58 (5.54-5.82)   | 5.73 (5.32-6.13)    | 5.68 (4.99-6.37)  |
| Physical working conditions      | 5.68 (5.46-5.90)      | 5.70 (5.48-5.93)        | 4.75 (4.58-4.92)                | 4.90 (4.73-5.06)   | 5.86 (5.38-6.35)    | 5.91 (5.35-6.47)  |
| Opportunities to use abilities   | 5.87 (5.65-6.10)      | 6.03 (5.85-6.21)        | 5.52 (5.38-5.65)                | 5.56 (5.40-5.71)   | 5.77 (5.42-6.12)    | 6.14 (5.53-6.74)  |
| Overall job satisfaction         | 5.95 (5.77-6.13)      | 5.70 (5.51-5.90)        | 6.05 (5.70-6.40)                | 5.96 (5.35-6.56)   | 5.54 (5.42-5.66)    | 5.44 (5.30-5.58)  |
| Freedom to choose method of work | 5.75 (5.55-5.95)      | 5.48 (5.27-5.69)        | 6.05 (5.63-6.46)                | 5.91 (5.30-6.52)   | 4.98 (4.82-5.14)    | 4.96 (4.80-5.13)  |
| Recognition for good work        | 5.40 (5.16-5.65)      | 5.15 (4.89-5.41)        | 5.50 (5.09-5.92)                | 5.77 (5.20-6.34)   | 4.91 (4.74-5.09)    | 4.79 (4.61-4.98)  |
| Rate of pay                      | 5.47 (5.24-5.70)      | 5.16 (4.90-5.42)        | 5.91 (5.52-6.30)                | 6.00 (5.44-6.56)   | 4.97 (4.79-5.14)    | 4.90 (4.74-5.06)  |
| Work hours                       | 4.49 (4.19-4.79)      | 3.92 (3.59-4.24)        | 5.46 (4.89-6.02)                | 5.63 (5.04-6.24)   | 4.52 (4.34-4.70)    | 4.48 (4.30-4.76)  |
| <b>JSS</b>                       | 5.58 (5.42-5.73)      | 5.38 (5.23-5.53)        | 5.73 (5.52-5.95)                | 5.81 (5.32-6.30)   | 5.16 (5.06-5.26)    | 5.14 (5.03-5.25)  |



## References

1. Smith R. Why are doctors so unhappy? *BMJ* 2001;322(7294):1073-74.
2. Zuger A. Dissatisfaction with medical practice. *N Engl J Med* 2004(350):69-75.
3. Surman G, Goldacre MJ, Lambert TW. UK-trained junior doctors' intentions to work in UK medicine: questionnaire surveys, three years after graduation. *Journal of the Royal Society of Medicine* 2017;110(12):493-500.
4. Crosson F, Casalino L. Physician Dissatisfaction in the United States: An Examination. *Professions and Professionalism* 2015;5(1):1-12.
5. Gibson J, Sutton M, Spooner S, et al. Ninth National GP Worklife Survey 2017. Manchester: University of Manchester. <http://blogs.lshtm.ac.uk/prucomm/files/2018/05/Ninth-National-GP-Worklife-Survey.pdf> (accessed 30 October 2018).
6. Pedersen Fischer A, Busk Nørøxe K, Bro F, et al. Alment praktiserende lægers psykiske arbejdsmiljø og jobtilfredshed 2016 (General Practitioners' psychological work environment and job satisfaction 2016). Aarhus: Forskningsenheden for Almen Praksis-Aarhus Universitet, 2016.
7. Scott A. General practice trends. Melbourne: ANZ-Melbourne Institute Health Sector. [https://mabel.org.au/\\_data/assets/pdf\\_file/0005/2334551/ANZ-MI-Health-Sector-Report.pdf](https://mabel.org.au/_data/assets/pdf_file/0005/2334551/ANZ-MI-Health-Sector-Report.pdf) (accessed 30 October 2018).
8. Rosta J, Nylenna M, Aasland OG. Job satisfaction among hospital doctors in Norway and Germany. A comparative study on national samples. *Scandinavian Journal of Public Health* 2009;37(5):503-8.
9. Voltmer E, Rosta J, Siegrist J, et al. Job stress and job satisfaction of physicians in private practice: comparison of German and Norwegian physicians. *International Archives of Occupational and Environmental Health* 2012;85(7):819-28.
10. Solberg IB, Tómasson K, Aasland O, et al. Cross-national comparison of job satisfaction in doctors during economic recession. *Occup Med (Lond)* 2014;64(8):595-600.
11. Tyssen R, Palmer KS, Solberg IB, et al. Physicians' perceptions of quality of care, professional autonomy, and job satisfaction in Canada, Norway, and the United States. *BMC Health Services Research* 2013;13(1):516.
12. Nylenna M, Gulbrandsen P, Førde R, et al. Unhappy doctors? A longitudinal study of life and job satisfaction among Norwegian doctors 1994-2002. *BMC Health Services Research* 2005;Jun 8;5:44.
13. Aasland OG, Rosta J, Nylenna M. Healthcare reforms and job satisfaction among doctors in Norway. *Scandinavian Journal of Public Health* 2010;38(3):253-8.
14. Nylenna M, Aasland OG. Jobtilfredshet blant norske leger [Job satisfaction among Norwegian doctors]. *Tidsskrift for Den norske legeforening* 2010;130(10):1028-31.
15. Wallace JE, Lemaire JB, Ghali WA. Physician wellness: a missing quality indicator. *Lancet* 2009;374(9702):1714-21.
16. Shanafelt TD, Noseworthy JH. Executive Leadership and Physician Well-being. *Mayo Clinic Proceedings* 2017;92(1):129-46.
17. Wallace JE, Lemaire J. Physician well being and quality of patient care: an exploratory study of the missing link. *Psychol Health Med* 2009;14(5):545-52.
18. Firth-Cozens J. Interventions to improve physicians' well-being and patient care. *Soc Sci Med* 2001;52 .
19. Friedberg M, Chen P, Van Busum K, et al. Factors Affecting Physician Professional Satisfaction and Their Implications for Patient Care, Health Systems, and Health Policy Santa Monica: RAND Corporation, 2013.
20. Casalino L, Crosson F. Physician Satisfaction and Physician Well-Being: Should Anyone Care? *Professions and Professionalism* 2015;5(1):1-12.

- 1 21. Angerer P, Weigl M. Physicians' psychosocial work conditions and quality of care: A  
2 literature review. *Professions and Professionalism* 2015;5(1):1-20.
- 3 22. Murray A, Montgomery JE, Chang H, et al. Doctor Discontent. *Journal of General*  
4 *Internal Medicine* 2001;16(7):452-59.
- 5 23. Sturm R. Effect of managed care and financing on practice constraints and career  
6 satisfaction in primary care. *J Am Board Fam Pract* 2002;15(5):367-77.
- 7 24. Linzer M, Konrad TR, Douglas J, et al. Managed Care, Time Pressure, and Physician Job  
8 Satisfaction: Results from the Physician Worklife Study. *Journal of General Internal*  
9 *Medicine* 2000;15(7):441-50.
- 10 25. Landon BE, Reschovsky J, Blumenthal D. Changes in career satisfaction among primary  
11 care and specialist physicians, 1997–2001. *JAMA* 2003;289 .
- 12 26. Steihaug S, Paulsen B, Melby L. Norwegian general practitioners' collaboration with  
13 municipal care providers – a qualitative study of structural conditions. *Scandinavian*  
14 *Journal of Primary Health Care* 2017;35(4):344-51.
- 15 27. Kjosavik SR. Ongoing recruitment crisis In Norwegian general practice. *Scandinavian*  
16 *Journal of Primary Health Care* 2018;36(2):107-08.
- 17 28. Rosta J, Aasland OG. Weekly working hours for Norwegian hospital doctors since 1994  
18 with special attention to postgraduate training, work–home balance and the European  
19 Working Time Directive: a panel study. *BMJ Open* 2014;4(10).
- 20 29. Rosta J, Aasland OG. Doctors' working hours and time spent on patient care in the period  
21 1994 - 2014. *Tidsskrift for Den norske legeforening* 2016;136(16):1355-9.
- 22 30. Warr P, Cook J, Wall T. Scales for the measurement of some work attitudes and aspects  
23 of psychological well-being. *Journal of Occupational Psychology* 1979;2(52):129-48.
- 24 31. Rosta J, Gerber A. Job satisfaction of hospital doctors. Results of a study of a national  
25 sample of hospital doctors in Germany. *Gesundheitswesen* 2008;70(8-9):519-24.
- 26 32. Falkum E. Psychosocial Work-Environment and Job Satisfaction. In: Larsen Ø, ed. The  
27 shaping of a profession Physicians in Norway, Past and Present. Canton: Science  
28 History Publications 1996:481-90.
- 29 33. Finset KB, Gude T, Hem E, et al. Which young physicians are satisfied with their work?  
30 A prospective nationwide study in Norway. *BMC Medical Education* 2005;5(1):19.
- 31 34. Schmit Jongbloed L. Physician job satisfaction in the Netherlands. Groningen: University  
32 of Groningen 2017.
- 33 35. Surman G, Lambert TW, Goldacre M. Doctors' enjoyment of their work and satisfaction  
34 with time available for leisure: UK time trend questionnaire-based study.  
35 *Postgraduate Medical Journal* 2016;92(1086):194-200.
- 36 36. Perina DG, Marco CA, Smith-Coggins R, et al. Well-Being among Emergency Medicine  
37 Resident Physicians: Results from the ABEM Longitudinal Study of Emergency  
38 Medicine Residents. *Journal of Emergency Medicine* 2018;55(1):101-09.e2.
- 39 37. Malhotra J, Wong E, Thind A. Canadian family physician job satisfaction - is it changing  
40 in an evolving practice environment? An analysis of the 2013 National Physician  
41 Survey database. *BMC Family Practice* 2018;19(1):100.
- 42 38. Behmann M, Schmiemann G, Lingner H, et al. Job Satisfaction Among Primary Care  
43 Physicians: Results of a Survey. *Deutsches Ärzteblatt International* 2012;109(11):193-  
44 200.(11):193-200.
- 45 39. Joyce C, Schurer S, Scott A, et al. Australian doctors' satisfaction with their work: results  
46 from the MABEL longitudinal survey of doctors. *Med J Aust* 2011;194(1):30-33.
- 47 40. Domagala A, Bała MM, Peña-Sánchez JN, et al. Satisfaction of physicians working in  
48 hospitals within the European Union: state of the evidence based on systematic  
49 review. *European Journal of Public Health* 2018;cky117-cky17.

- 1 41. NOA. Jobbtilfredshet (Job satisfaction) Oslo: NOA (Nasjonal overvåking av  
2 arbeidsmiljø), 2016.  
3 <https://noa.stami.no/arbeidsmiljoindikatorer/psykososialtorganisorisk/jobbtilfredshet>  
4 1/tilfredshet/ (accessed 30 October 2018).
- 5 42. Førde R, Aasland OG. Moralsk stress og faglig ytringsfrihet blant leger (Moral distress  
6 and professional freedom of speech among doctors). *Tidsskrift for Den norske*  
7 *legeforening* 2013;12-13(133):1310-13.
- 8 43. McKinlay J, Marceau L. New wine in an old bottle: does alienation provide an  
9 explanation of the origins of physician discontent? *International Journal of Health*  
10 *Services* 2011;41 (2):301-35.
- 11 44. Ringard Å, Sagan A, Sperre Saunes I, et al. Norway: Health system review. *Health*  
12 *Systems in Transition* 2013;15(8):1-162.
- 13 45. Ringard Å, Saunes IS, Sagan A. The 2015 hospital treatment choice reform in Norway:  
14 Continuity or change? *Health Policy* 2016;120(4):350-55.
- 15 46. NMHCS. Fremtidens primærhelsetjeneste – nærhet og helhet (The future primary care –  
16 proximity and comprehensiveness). Oslo: Norwegian Ministry of Health and Care  
17 Services, 2015.
- 18 47. Stoddard JJ, Hargraves JL, Reed M, et al. Managed care, professional autonomy, and  
19 income: effects on physician career satisfaction. *J Gen Intern Med* 2001;16.
- 20 48. Dugdale D, Epstein R, Pantilat S. Time and the patient-physician relationship. *Journal of*  
21 *General Internal Medicine* 1999(Suppl. 1):S34-40.
- 22 49. Bovier P, Perneger T. Predictors of work satisfaction among physicians. *European*  
23 *Journal of Public Health* 2003;13(4):299-305.
- 24 50. Rebnord IK, Eikeland OJ, Hunskår S, et al. Fastlegers tidsbruk (GPs working time).  
25 Bergen: Nasjonalt kompetansesenter for legevaktmedisin, Uni Research Helse, 2018.
- 26 51. Ramboll. Spørreskjemaundersøkelse - sykehuslegers arbeidsforhold 2018 (Survey on  
27 hospital doctors working conditions 2018).  
28 [https://www.dagensmedisin.no/contentassets/b79cfab99ba6437bb3ccf9efa9ad75aa/sp](https://www.dagensmedisin.no/contentassets/b79cfab99ba6437bb3ccf9efa9ad75aa/sporreundersokelse-om-sykehuslegers-arbeidsforhold-2018.pdf)  
29 [orreundersokelse-om-sykehuslegers-arbeidsforhold-2018.pdf](https://www.dagensmedisin.no/contentassets/b79cfab99ba6437bb3ccf9efa9ad75aa/sporreundersokelse-om-sykehuslegers-arbeidsforhold-2018.pdf) (accessed 30 October  
30 2018).
- 31 52. Trønderopprøret. Trønderopprørets fastlegeundersøkelse og  
32 helsemedarbeiderundersøkelse (Survey on GPs and health workers). Trondheim, 2018.  
33 <http://www.flo20.no/wp-content/uploads/2018/06/TOundersokelse-2.pdf> (accessed 30  
34 October 2018).
- 35 53. Lehn H. Utvikling i bruk av fastlege og legevakt: Analysenotat i Samdata kommune  
36 (Development in the use of GP-service and emergency medical service). Oslo:  
37 Helsedirektoratet, 2018.
- 38 54. Hertzberg K, Skirbekk H, Tyssen R, et al. Den gode legen - sterk og utholdende. (The  
39 good doctor – strong and persevering). *Tidsskrift for Den norske legeforening*  
40 2016;136(19):1631-4.
- 41 55. Hertzberg T, Skirbekk H, Tyssen R, et al. Dagens sykehuslege - fremdeles alltid på vakt  
42 (The hospital doctor of today - still continuously on duty). *Tidsskrift for Den norske*  
43 *legeforening* 2016;136(19):1635-8.
- 44 56. Richardsen A, Burke R. Occupational stress and job satisfaction among physicians: sex  
45 differences. *Soc Sci Med* 1991;33(10):1179-87.
- 46 57. Arbeidsdepartementet. Lov om arbeidsmiljø, arbeidstid og stillingsvern - LOV 2005-06-  
47 17 nr 62 (Law on working environment, working time and employment protection).  
48 Oslo: Arbeidsdepartementet 2005.
- 49 58. EU. European Health and Safety Legislation. Article 153 of the Treaty on the Functioning  
50 of the European Union: European Union, 1989.

- 1  
2  
3 1 59. Landon B, Reschovsky J, Pham H, et al. Leaving medicine: the consequences of physician  
4 2 dissatisfaction. *Med Care* 2009;44(3):234-42.  
5 3 60. Nilsen L. Mange innbyggere har ikke fastlege (Many citizens do not have GP). *Dagens*  
6 4 *medisin*. Oslo, 2016.  
7 5 61. Korsvold L, Tønnessen C, Sirnes E, et al. Leger i kommune- og spesialisthelsetjenesten  
8 6 (Doctors in municipal and specialist health service). Oslo: Helsedirektoratet, 2017.  
9 7 62. Gaski M, Abelsen B. Fastlegetjenesten i Nord-Norge (GP service in northern Norway).  
10 8 Tromsø: NSDM, 2018.  
11 9  
12  
13  
14  
15  
16  
17  
18  
19  
20  
21  
22  
23  
24  
25  
26  
27  
28  
29  
30  
31  
32  
33  
34  
35  
36  
37  
38  
39  
40  
41  
42  
43  
44  
45  
46  
47  
48  
49  
50  
51  
52  
53  
54  
55  
56  
57  
58  
59  
60

For peer review only

1  
2  
3  
4  
5  
6  
7  
8  
9  
10  
11  
12  
13  
14  
15  
16  
17  
18  
19  
20  
21  
22  
23  
24  
25  
26  
27  
28  
29  
30  
31  
32  
33  
34  
35  
36  
37  
38  
39  
40  
41  
42  
43  
44  
45  
46  
47  
48  
49  
50  
51  
52  
53  
54  
55  
56  
57  
58  
59  
60

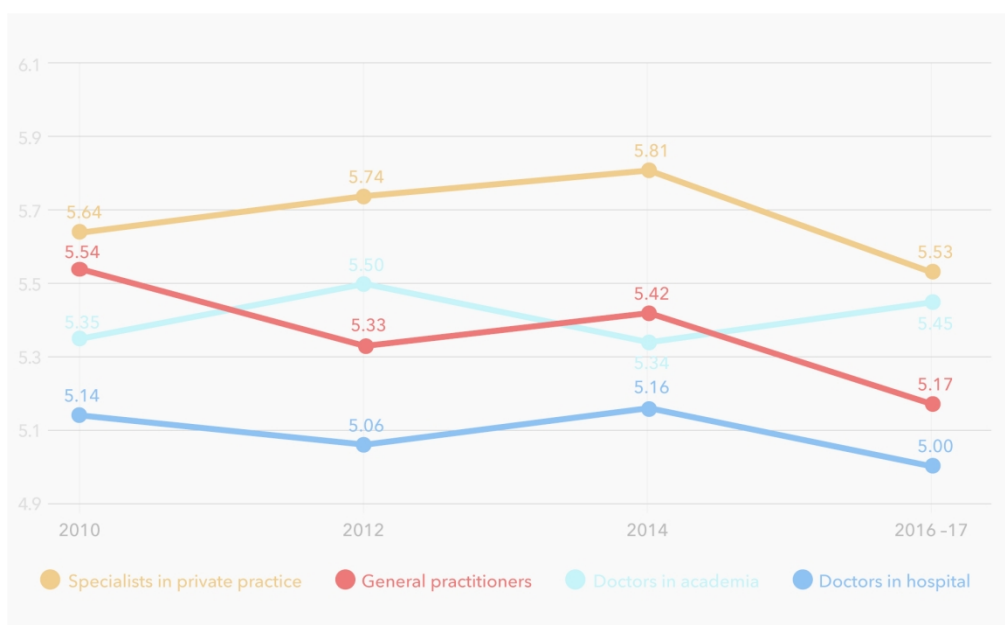

GLM on estimated means of job satisfaction (scored from 1 to 7) controlled for age and gender among doctors in different type of work in 2010, 2012, 2014 and 2016-17.

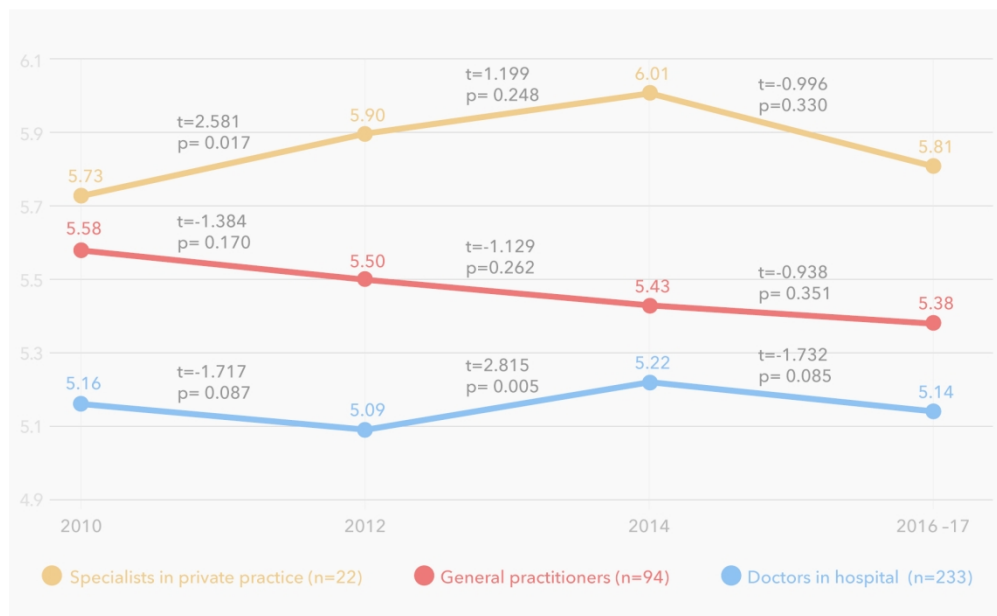

Paired t-test on changes of estimated means of job satisfaction (scored from 1 to 7) among doctors in different type of work that responded at all four time points

**STROBE 2007 (v4) checklist of items to be included in reports of observational studies in epidemiology\***  
**Checklist for cohort, case-control, and cross-sectional studies (combined)**

**Norwegian doctors still happy? Job satisfaction among Norwegian doctors 2010 – 2017 based on repeated surveys**

**Judith ROSTA, Olaf G. AASLAND, Magne NYLENNA**

| Section/Topic             | Item # | Recommendation                                                                                                                                                                                                                                                                                                                                                                                                                                                         | Reported on page # |
|---------------------------|--------|------------------------------------------------------------------------------------------------------------------------------------------------------------------------------------------------------------------------------------------------------------------------------------------------------------------------------------------------------------------------------------------------------------------------------------------------------------------------|--------------------|
| <b>Title and abstract</b> | 1      | (a) Indicate the study's design with a commonly used term in the title or the abstract                                                                                                                                                                                                                                                                                                                                                                                 | 1-2                |
|                           |        | (b) Provide in the abstract an informative and balanced summary of what was done and what was found                                                                                                                                                                                                                                                                                                                                                                    | 2                  |
| <b>Introduction</b>       |        |                                                                                                                                                                                                                                                                                                                                                                                                                                                                        |                    |
| Background/rationale      | 2      | Explain the scientific background and rationale for the investigation being reported                                                                                                                                                                                                                                                                                                                                                                                   | 4                  |
| Objectives                | 3      | State specific objectives, including any pre-specified hypotheses                                                                                                                                                                                                                                                                                                                                                                                                      | 5                  |
| <b>Methods</b>            |        |                                                                                                                                                                                                                                                                                                                                                                                                                                                                        |                    |
| Study design              | 4      | Present key elements of study design early in the paper                                                                                                                                                                                                                                                                                                                                                                                                                | 5                  |
| Setting                   | 5      | Describe the setting, locations, and relevant dates, including periods of recruitment, exposure, follow-up, and data collection                                                                                                                                                                                                                                                                                                                                        | 5                  |
| Participants              | 6      | (a) <i>Cohort study</i> —Give the eligibility criteria, and the sources and methods of selection of participants. Describe methods of follow-up<br><i>Case-control study</i> —Give the eligibility criteria, and the sources and methods of case ascertainment and control selection. Give the rationale for the choice of cases and controls<br><i>Cross-sectional study</i> —Give the eligibility criteria, and the sources and methods of selection of participants | 5                  |
|                           |        | (b) <i>Cohort study</i> —For matched studies, give matching criteria and number of exposed and unexposed<br><i>Case-control study</i> —For matched studies, give matching criteria and the number of controls per case                                                                                                                                                                                                                                                 | N/A                |
| Variables                 | 7      | Clearly define all outcomes, exposures, predictors, potential confounders, and effect modifiers. Give diagnostic criteria, if applicable                                                                                                                                                                                                                                                                                                                               | 5-6                |
| Data sources/ measurement | 8*     | For each variable of interest, give sources of data and details of methods of assessment (measurement). Describe comparability of assessment methods if there is more than one group                                                                                                                                                                                                                                                                                   | 5-6                |
| Bias                      | 9      | Describe any efforts to address potential sources of bias                                                                                                                                                                                                                                                                                                                                                                                                              | 10                 |
| Study size                | 10     | Explain how the study size was arrived at                                                                                                                                                                                                                                                                                                                                                                                                                              | 5 and Table 1      |
| Quantitative variables    | 11     | Explain how quantitative variables were handled in the analyses. If applicable, describe which groupings were chosen and why                                                                                                                                                                                                                                                                                                                                           | 5                  |
| Statistical methods       | 12     | (a) Describe all statistical methods, including those used to control for confounding                                                                                                                                                                                                                                                                                                                                                                                  | 6-7                |
|                           |        | (b) Describe any methods used to examine subgroups and interactions                                                                                                                                                                                                                                                                                                                                                                                                    | 6-7                |
|                           |        | (c) Explain how missing data were addressed                                                                                                                                                                                                                                                                                                                                                                                                                            | 7                  |

|                          |     |                                                                                                                                                                                                                                                                                                                                                                                                               |                                       |
|--------------------------|-----|---------------------------------------------------------------------------------------------------------------------------------------------------------------------------------------------------------------------------------------------------------------------------------------------------------------------------------------------------------------------------------------------------------------|---------------------------------------|
|                          |     | (d) <i>Cohort study</i> —If applicable, explain how loss to follow-up was addressed<br><i>Case-control study</i> —If applicable, explain how matching of cases and controls was addressed<br><i>Cross-sectional study</i> —If applicable, describe analytical methods taking account of sampling strategy                                                                                                     | N/A                                   |
|                          |     | (e) Describe any sensitivity analyses                                                                                                                                                                                                                                                                                                                                                                         | N/A                                   |
| <b>Results</b>           |     |                                                                                                                                                                                                                                                                                                                                                                                                               |                                       |
| Participants             | 13* | (a) Report numbers of individuals at each stage of study—eg numbers potentially eligible, examined for eligibility, confirmed eligible, included in the study, completing follow-up, and analysed<br>(b) Give reasons for non-participation at each stage<br>(c) Consider use of a flow diagram                                                                                                               | 7 and Table 1<br>7 and Table 1<br>N/A |
| Descriptive data         | 14* | (a) Give characteristics of study participants (eg demographic, clinical, social) and information on exposures and potential confounders<br>(b) Indicate number of participants with missing data for each variable of interest<br>(c) <i>Cohort study</i> —Summarise follow-up time (eg, average and total amount)                                                                                           | 7-8<br>7 and Table 1<br>N/A           |
| Outcome data             | 15* | <i>Cohort study</i> —Report numbers of outcome events or summary measures over time<br><i>Case-control study</i> —Report numbers in each exposure category, or summary measures of exposure<br><i>Cross-sectional study</i> —Report numbers of outcome events or summary measures                                                                                                                             | N/A<br>N/A<br>8-9                     |
| Main results             | 16  | (a) Give unadjusted estimates and, if applicable, confounder-adjusted estimates and their precision (eg, 95% confidence interval). Make clear which confounders were adjusted for and why they were included<br>(b) Report category boundaries when continuous variables were categorized<br>(c) If relevant, consider translating estimates of relative risk into absolute risk for a meaningful time period | 8-9 and Figure 1 and 2<br>N/A<br>N/A  |
| Other analyses           | 17  | Report other analyses done—eg analyses of subgroups and interactions, and sensitivity analyses                                                                                                                                                                                                                                                                                                                | 9-10 and Table 2, 3                   |
| <b>Discussion</b>        |     |                                                                                                                                                                                                                                                                                                                                                                                                               |                                       |
| Key results              | 18  | Summarise key results with reference to study objectives                                                                                                                                                                                                                                                                                                                                                      | 10                                    |
| Limitations              | 19  | Discuss limitations of the study, taking into account sources of potential bias or imprecision. Discuss both direction and magnitude of any potential bias                                                                                                                                                                                                                                                    | 10                                    |
| Interpretation           | 20  | Give a cautious overall interpretation of results considering objectives, limitations, multiplicity of analyses, results from similar studies, and other relevant evidence                                                                                                                                                                                                                                    | 12-15                                 |
| Generalisability         | 21  | Discuss the generalisability (external validity) of the study results                                                                                                                                                                                                                                                                                                                                         | 10-12                                 |
| <b>Other information</b> |     |                                                                                                                                                                                                                                                                                                                                                                                                               |                                       |
| Funding                  | 22  | Give the source of funding and the role of the funders for the present study and, if applicable, for the original study on which the present article is based                                                                                                                                                                                                                                                 | N/A                                   |

\*Give information separately for cases and controls in case-control studies and, if applicable, for exposed and unexposed groups in cohort and cross-sectional studies.

**Note:** An Explanation and Elaboration article discusses each checklist item and gives methodological background and published examples of transparent reporting. The STROBE checklist is best used in conjunction with this article (freely available on the Web sites of PLoS Medicine at <http://www.plosmedicine.org/>, Annals of Internal Medicine at <http://www.annals.org/>, and Epidemiology at <http://www.epidem.com/>). Information on the STROBE Initiative is available at [www.strobe-statement.org](http://www.strobe-statement.org).



# BMJ Open

## Changes in job satisfaction among doctors in Norway from 2010 to 2017.A study based on repeated surveys

|                                 |                                                                                                                                                                                                                                                   |
|---------------------------------|---------------------------------------------------------------------------------------------------------------------------------------------------------------------------------------------------------------------------------------------------|
| Journal:                        | <i>BMJ Open</i>                                                                                                                                                                                                                                   |
| Manuscript ID                   | bmjopen-2018-027891.R1                                                                                                                                                                                                                            |
| Article Type:                   | Research                                                                                                                                                                                                                                          |
| Date Submitted by the Author:   | 05-Apr-2019                                                                                                                                                                                                                                       |
| Complete List of Authors:       | Rosta, Judith; Institute for Studies of the Medical Profession<br>Aasland, Olaf; Institute for Studies of the Medical Profession<br>Nylenna, Magne; The Norwegian Institute of Public Health; University of Oslo, Institute of Health and Society |
| <b>Primary Subject Heading</b>: | Health services research                                                                                                                                                                                                                          |
| Secondary Subject Heading:      | Health policy, Occupational and environmental medicine, Epidemiology                                                                                                                                                                              |
| Keywords:                       | job satisfaction, doctors, Norway, repeated surveys                                                                                                                                                                                               |
|                                 |                                                                                                                                                                                                                                                   |

SCHOLARONE™  
Manuscripts

1  
2  
3 1 Re-submission to BMJ Open

4  
5 2 (Manuscript ID bmjopen-2018-027891)

6  
7 3  
8  
9  
10 4 **Changes in job satisfaction among doctors**  
11  
12  
13 5 **in Norway from 2010 to 2017.**

14  
15  
16 6 **A study based on repeated surveys**

17  
18  
19 7  
20  
21 8 **Judith Rosta**, PhD, senior researcher (1)

22  
23 9 **Olaf G. Aasland**, MD, MHA, senior researcher (1)

24  
25 10 **Magne Nylenna**, MD, PhD, professor (2,3)

26  
27 11  
28  
29 12 **Affiliations:** (1) Institute for Studies of the Medical Profession, Oslo, Norway; (2) Institute of Health  
30  
31 13 and Society, University of Oslo, Norway; (3) The Norwegian Institute of Public Health, Oslo, Norway

32  
33 14  
34  
35 15 **Word count:** 4336

36  
37 16 **Number of tables:** 3

38  
39 17 **Number of figures:** 2

40  
41 18 **Keywords:** Job satisfaction, doctors, Norway, repeated surveys

42  
43 19  
44 20 **Corresponding author**

45 21 Name: Judith Rosta

46 22 Institute: Institute for Studies of the Medical Profession, NMA

47 23 Street: Akersgata 2,

48 24 Postal code: 0107

49 25 City: Oslo

50 26 Country: Norway

51 27 Email: [judith.rosta@legeforeningen.no](mailto:judith.rosta@legeforeningen.no)

1  
2  
3 1 **ABSTRACT**

4  
5 2 **OBJECTIVE**

6  
7 3 To assess job satisfaction for different categories of Norwegian doctors from 2010 to 2016-17.

8  
9 4 **DESIGN**

10  
11 5 Cross sectional surveys in 2010, 2012, 2014 and 2016-17 of partly overlapping samples.

12  
13 6 **SETTING**

14  
15 7 Norway from 2010 to 2016-17.

16  
17 8 **PARTICIPANTS**

18  
19 9 Doctors working in different job positions (hospital doctors, GPs, private practice specialists, doctors  
20  
21 in academia). Response rates were 67% (1014/1520) in 2010, 71% (1279/1792) in 2012, 75%  
22  
23 (1158/1545) in 2014 and 73% (1604/2195) in 2016-17. The same 548 doctors responded at all four  
24  
25 points in time.  
26  
27

28  
29 13 **MAIN OUTCOME MEASURE**

30  
31 14 Job Satisfaction Scale (JSS), a 10-item widely used instrument, with scores ranging from 1 (low  
32  
33 satisfaction) to 7 (high satisfaction) for each item, and an unweighted mean total sum score.

34  
35 16 **ANALYSIS**

36  
37 17 GLM, controlling for gender and age, and paired t-tests.

38  
39 18 **RESULTS**

40  
41 19 For all doctors, the mean scores of JSS decreased significantly from 5.52 (95% confidence interval  
42  
43 5.42 to 5.61) in 2010 to 5.30 (5.22 to 5.38) in 2016-17. The decrease was significant for GPs (5.54,  
44  
45 5.43 to 5.65 vs. 5.17, 5.07 to 5.28) and hospital doctors (5.14, 5.07 to 5.21 vs. 5.00, 4.94 to 5.06).  
46  
47 22 Private practice specialists were most satisfied, followed by GPs and hospital doctors. The difference  
48  
49 23 between the GPs and the private practice specialists increased over time.

50  
51 24 **CONCLUSIONS**

52  
53 25 From 2010 to 2016-17 job satisfaction for Norwegian doctors decreased, but it was still at a relatively  
54  
55 high level. Several health care reforms and regulations over the last decade and changes in the  
56  
57 professional culture may explain some of the reduced satisfaction.

58  
59 28 **KEYWORDS:** Job satisfaction, doctors, Norway, repeated surveys

1  
2  
3 1 **Strengths and limitations of the study**  
4

5 2 The surveys had high response rates.  
6  
7 3

8  
9 4 The data allowed for generalisation to the whole doctor workforce in Norway.  
10  
11 5

12  
13 6 There were similarities in survey methods and measurements at all four points in time.  
14  
15 7

16  
17 8 The ten item version of the Warr-Cook-Wall scale for job satisfaction was specifically modified for  
18  
19 9 GPs in the UK, but it has been used extensively in doctor populations both in Norway and elsewhere.  
20  
21 10

22  
23 11 Analyses were based on self-reported questionnaire data with the possibility of both over- and  
24  
25 12 underestimation.  
26  
27 13

28  
29  
30 14  
31  
32  
33  
34  
35  
36  
37  
38  
39  
40  
41  
42  
43  
44  
45  
46  
47  
48  
49  
50  
51  
52  
53  
54  
55  
56  
57  
58  
59  
60

## 1 INTRODUCTION

2  
3 Job satisfaction is important both for individual employees and organisations. It is linked to  
4 employees' productivity,<sup>1</sup> absenteeism,<sup>2</sup> turnover,<sup>3</sup> physical and mental health and well-being.<sup>3-6</sup>

5  
6 For doctors, wellness is crucial to the delivery of good health care and has been identified as a missing  
7 quality indicator.<sup>7</sup> Satisfaction is a substantial element of professional wellness and has as such  
8 become a key performance indicator in quality systems.<sup>8</sup> While a high level of job satisfaction is  
9 associated with positive outcomes, doctors' job discontent may become a threat to the quality of  
10 patient care and safety, on an individual as well as on a system level.<sup>9-14</sup>

11  
12 Doctors' job satisfaction is related to work load, healthcare organization and management,  
13 professional autonomy, the ability to provide high quality health care, and financial systems including  
14 personal income.<sup>14-19</sup>

15  
16 Two important reforms were introduced in Norway at the beginning of the 21 century: "The Regular  
17 General Practitioners Scheme" in 2001 and "The Hospital Reform" in 2002. The Regular General  
18 Practitioners Scheme introduced a list-patient system whereby all inhabitants in Norway have their  
19 assigned general practitioner. This reform aimed at enhancing access to general practitioners and  
20 continuity in the patient-doctor relationship. The implementation of the list-patient system has  
21 modified the structure of GPs' remuneration into a combination of three sources: capitation based  
22 payment from the local government, fee-for-service payment from NAV (the National Insurance  
23 System) and out-of-pocket payments from patients. The Hospital Reform transferred the ownership of  
24 hospitals and specialist health services from the county to the state level, organised through central and  
25 local health enterprises.

26  
27 Previous studies showed that the satisfaction level among doctors in Norway was stable and high from  
28 1994 to 2002<sup>20</sup> and even increased from 2000 to 2006.<sup>21</sup> General practitioners and private practice

1  
2  
3 1 specialists were generally more satisfied than hospital doctors.<sup>21 22</sup> The above mentioned  
4  
5 2 comprehensive reforms did not have any detectable positive or negative impact on the job satisfaction  
6  
7 3 of neither hospital doctors nor GPs,<sup>21</sup> as opposed to an international negative trend.<sup>23-27</sup> The  
8  
9 4 satisfaction level of doctors in Norway was higher than in comparable countries like Germany,<sup>28 29</sup>  
10  
11 5 Iceland<sup>30</sup> and the US.<sup>19</sup>  
12  
13  
14 6

15  
16 7 Three new organizational reforms have also been introduced in Norwegian health care over the last  
17  
18 8 decade. "The Coordination Reform" from 2012 intended to improve the collaboration between  
19  
20 9 specialist (secondary) and municipal (primary) health care levels by placing more responsibility for  
21  
22 10 individual patients on the local community. This has resulted in an increased workload on the general  
23  
24 11 practitioners,<sup>31 32</sup> which so far has not been compensated by a corresponding strengthening in  
25  
26 12 resources and staffing.<sup>33</sup> "The Free Choice of Hospital Reform" in 2015 gave the users a free choice of  
27  
28 13 hospital,<sup>34</sup> and the white paper on "The Future Primary Care – Proximity and Comprehensiveness" in  
29  
30 14 2015, which aimed to improve user involvement, availability, prevention, proactivity and  
31  
32 15 collaboration between multidisciplinary teams.<sup>35</sup> The impact of these reforms on doctors' job  
33  
34 16 satisfaction has so far been insufficiently explored.  
35  
36  
37 17

38  
39 18 There are several instruments to measure job satisfaction, including single items and multi-item  
40  
41 19 scales.<sup>6 36 37</sup> A widely used instrument in health care settings is the ten item version<sup>38</sup> of the Warr-  
42  
43 20 Cook-Wall job satisfaction scale (JSS),<sup>6</sup> assessing both total job satisfaction and satisfaction with  
44  
45 21 different aspects of the job.<sup>19-21 26 28-30 38-40</sup> It also allows for good national and international  
46  
47 22 comparisons.  
48  
49 23

50  
51 24 This paper reports the development of job satisfaction among Norwegian doctors from 2010 to 2016-  
52  
53 25 17 with special emphasis on general practitioners and a possible effect of the latest reforms.  
54  
55  
56 26  
57  
58 27  
59  
60 28

## 1 MATERIALS AND METHODS

### 2 Design and participants

3 Since 1994 the Institute for Studies of the Medical Profession (LEFO, [www.legeforsk.org](http://www.legeforsk.org)) has  
4 regularly surveyed a representative panel of active Norwegian doctors biannually with postal  
5 questionnaires. The original panel was based on an invitation to 2,000 randomly selected active  
6 Norwegian doctors in 1993. The 1,272 doctors who agreed to participate were representative of the  
7 total doctor work force in terms of age, sex, specialty and place of work. Since then approximately 540  
8 doctors have left the panel due to retirement, death, or voluntary withdrawal. Therefore, the panel was  
9 supplemented with approximately 400 young doctors in 2000, 250 young doctors in 2008, 300 in 2012  
10 and 650 doctors in 2016-17, maintaining the representativity.<sup>41 42</sup> With this in and out pattern our  
11 cohort constitutes what may be called an unbalanced cohort.

12  
13 This article is based on data from 2010, 2012, 2014 (partly in 2015) and 2016 (partly in 2017).

### 15 Inclusion and exclusion criteria

16 Since interns were only identified in data from 2016-17, this category is excluded in this paper.

### 18 Ethical approval

19 According to the Regional Committee for Medical Research Ethics, the study based  
20 on "Norwegian Physician Survey - A bi-annual prospective questionnaire survey to a representative  
21 sample of Norwegian physicians" is exempt from review in Norway, cf. §§ 4 of The Act. The project  
22 can be implemented without the approval by the Regional Committee for  
23 Medical Research Ethics (IRB 0000 1870). All invitees received a letter with a description of the  
24 "Norwegian Physician Survey" aim. It was also explained that the participation is voluntary and the  
25 data would be handled confidentially. All participants signed informed written consent before the start  
26 of the survey.

## 1 **Dependent variable**

2  
3  
4  
5 2 *Total job satisfaction* and *satisfaction with different aspect of the job* were measured with the ten item  
6  
7 version<sup>38</sup> of the "Job Satisfaction Scale" by Warr, Cook and Wall.<sup>6</sup>

8  
9  
10  
11 5 The original scale included one item assessing the overall satisfaction and fifteen items assessing two  
12  
13 6 factors related to job satisfaction, the intrinsic factor (seven items on attitudes towards personal  
14  
15 7 achievement and task success: freedom to choose your own method of working, recognition you get  
16  
17 8 for good work, the amount of responsibility you are given, your opportunity to use your abilities, your  
18  
19 9 chance of promotion, the attention payed to suggestions you make, the amount of variety in your job)  
20  
21 10 and extrinsic factor (eight items on attitudes on working conditions: physical working conditions, your  
22  
23 11 fellow workers, your immediate boss, your rate of pay, industrial relations between management and  
24  
25 12 workers in your firm, the way your firm is managed, your hours of work, your job security). The total  
26  
27 13 job satisfaction was calculated as the sum of all separate items. The scale was tested for validity and  
28  
29 14 reliability in blue-collar male workers employed full-time in a manufactural industry in the United  
30  
31 15 Kingdom.<sup>6</sup>

32  
33  
34  
35  
36  
37 17 The ten item form of the original scale was devised by Cooper-Rout-Faragher in 1989 to study job  
38  
39 18 satisfaction, mental health and stress among general practitioners in England. Five items were  
40  
41 19 removed from the original scale that were not relevant for the general practitioners population: "your  
42  
43 20 immediate boss", "industrial relations between management and workers in your firm", "your chance  
44  
45 21 of promotion", "the way your firm is managed" and "your job security". The scale was not tested for  
46  
47 22 validity and reliability by Cooper, Rout and Faragher.<sup>38</sup> A validation study of this scale was done in a  
48  
49 23 cohort of Australian clinical medical workforce by Hills, Joyce and Humphries in 2012, where the  
50  
51 24 original seven point Likert scale was reduced to five point Likert scale from 0 (very dissatisfied) to 4  
52  
53 25 (very satisfied). Factor analytic and internal reliability tests did not support differentiating intrinsic and  
54  
55 26 extrinsic factors. They supported the use of the ten item instrument as a single-factor scale and the use  
56  
57 27 of a composite job satisfaction score.<sup>43</sup>

58  
59  
60 28



1 The ten item version<sup>38</sup> of the original Warr-Cook-Wall questionnaire with seven point Likert scale<sup>6</sup>  
2 was used extensively in doctors population in Norway and elsewhere.<sup>19-22 26 28-30 39 40</sup> We applied this  
3 instrument in our study to allow comparisons across countries and over time. The ten item were:

4 How satisfied are you with:

- 5 (1) The amount of responsibility you are given
- 6 (2) Variation of work
- 7 (3) Your colleagues and fellow workers
- 8 (4) Your physical work conditions
- 9 (5) Your opportunities to use your skills
- 10 (6) Your overall job situation
- 11 (7) The freedom to choose your own methods of working
- 12 (8) The recognition you get for good achievements
- 13 (9) Your rate of pay
- 14 (10) Your work hours

15 We asked the doctors to score each of the ten items on a seven point Likert scale from 1 (very  
16 dissatisfied) to 7 (very satisfied). An unweighted mean sum score was calculated, as well as analyses  
17 of single items.

18

### 19 **Independent variables**

20 There are several possible job positions for doctors in Norway. For the purpose of this study, they are  
21 collapsed into the following seven categories:

- 22 (a) Doctors in hospital: doctors in management positions (medical superintendent, head of department,  
23 chief senior consultant, head of unit, senior consultant, head of section), senior hospital consultants  
24 and specialty registrars
- 25 (b) General practitioners
- 26 (c) Specialists working in private practice
- 27 (d) Doctors in academia: professor, associate professor, research fellow, and researcher

- 1  
2  
3 1 (e) Community medical officers: district medical officer, senior district medical officer, nursing home  
4  
5 2 medical officer, visiting medical officer, doctor at infant welfare clinic, community general  
6  
7 3 practitioner  
8  
9 4 (f) Doctors in administrative positions: county medical officer, medical advisor, chief medical officer  
10  
11 5 (g) Other key job categories  
12  
13 6 Other independent variables were *gender* and *age*.  
14  
15  
16  
17

## 18 8 **Analysis**

19  
20 9 The distribution of JSS was close to normal (Kolmogorov-Smirnov test 0.56,  $p < 0.001$ ) with a slightly  
21  
22 10 negative skewness (-0.62). Thus the use of parametric tests was unproblematic. General Linear  
23  
24 11 modelling (GLM) controlled for gender and age was used to estimate the means of job satisfaction at  
25  
26 12 the four points in time: 2010, 2012, 2014, and 2016-17. Statistically significant differences were  
27  
28 13 assumed when the 95% confidence intervals were not overlapping.  
29

30  
31 14  
32 15 Paired t-tests were used to show individual differences between two points in time.  
33  
34  
35  
36

37 17 Three different samples were analysed. The first consisted of all respondents at all times, the  
38  
39 18 *unbalanced cohort*. Here respondents with missing data on gender or age or all JSS items were  
40  
41 19 excluded. The second sample comprised doctors with defined job positions in one of four categories:  
42  
43 20 GPs, specialists in private practice, hospital doctors, and doctors in academia in minimum one survey.  
44  
45 21 The third, *longitudinal* sample were the doctors who responded at all four points in time. A subsample  
46  
47 22 here were the doctors who did not change job position during the observational period.  
48  
49  
50

51 24 Predictive Analytics Software Statistics 25 was used for the analyses.  
52  
53  
54  
55  
56  
57  
58  
59  
60

## 1 Patient and public involvement

2 No patients were involved in setting the research questions or the outcome measures, nor were they  
3 involved in the design and implementation of the study. There are no plans to involve patients in  
4 dissemination.

## 7 RESULTS

### 8 Respondents

9 Table 1 shows the sample, number of respondents, response rates and the makeup of job positions for  
10 which we have data on JSS, gender and age: 948 in 2010, 1164 in 2012, 1057 in 2014 and 1290 in  
11 2016-17. The majority of respondents worked in hospitals.

13 Table 1

15 The proportion of females increased from 37.4% (95 % CI 34.3 to 40.5) in 2010, to 43.4% (40.6 to  
16 46.3) in 2012, was 42.5% (39.5 to 45.5) in 2014 and increased further to 52.9% (50.3 to 55.5) in 2016-  
17 17. The mean age was 50.7 (95% CI 49.9 to 51.6) years in 2010, 49.7 (48.9 to 50.4) years in 2012,  
18 50.5 (49.7 to 51.3) years in 2014 and 47.7 (46.9 to 48.4) years in 2016-17.

20 The representativity of the data for 2010, 2012 and 2014 is described elsewhere.<sup>42</sup> Data for 2016-17  
21 are comparable with the Norwegian doctor workforce in 2016-17 regarding age, but with a slightly  
22 higher percentage of females, and doctors in academia (data not shown). The distribution of doctors in  
23 different job positions are comparable over the study period (Table 1).

25 548 doctors responded at all four time points, 202 (37%) females. Mean age in 2010 was 48.1 years.  
26 64.8% (355/548) were stable in their jobs over the period: 233 hospital doctors, 94 GPs, 22 private  
27 practice specialists and 6 doctors in academia. Due to the low number of doctors in academia, this  
28 group is excluded in some of the analyses.

## 1 2 3 1 4 5 2 **Changes in job satisfaction**

### 6 7 3 *All doctors*

8  
9 4 The estimated mean of job satisfaction, controlled for gender, age and job position for all respondents  
10  
11 5 in 2016-17, was 5.30, (95% CI 5.22 to 5.38), which is significantly lower than in 2010 (5.52, 5.42 to  
12  
13 6 5.61), and non-significantly different from 2012 (5.45, 5.37 to 5.54) and 2014 (5.44, 5.35 to 5.53).  
14  
15 7

### 16 17 18 8 *Doctors in different job positions*

19  
20 9 Over the whole period, the mean score of job satisfaction decreased for GPs and for hospital doctors.  
21  
22 10 Private practice specialists were the most satisfied, while hospital doctors were least satisfied. No  
23  
24 11 differences were found between GPs and doctors in academia. Job satisfaction generally increased  
25  
26 12 from 2012 to 2014 and decreased from 2014 to 2016-17 for GPs, private practice specialists and  
27  
28 13 hospital doctors. In 2016-17, GPs reported significantly higher satisfaction than hospital doctors, and  
29  
30 14 significantly lower satisfaction than private practice specialists.  
31  
32 15

33  
34  
35 16 Figure 1 with table  
36  
37 17

38  
39 18 From 2010 to 2016-17 there was a non-significant change in JSS for other job positions such as  
40  
41 19 community medical officers (5.59, 95% CI 5.26 to 5.91 vs. 5.33, 5.10 to 5.56), doctors in  
42  
43 20 administration (5.75, 5.38 to 6.12 vs. 5.39, 5.08 to 5.71) and doctors in other positions (5.61, 5.32 to  
44  
45 21 5.89 vs. 5.23, 4.99 to 5.46).  
46  
47 22

### 48 49 23 *Effect of age, gender and specialty on estimated means of JSS*

50  
51 24 There were no gender differences. JSS increased with increasing age. Among hospital doctors, JSS did  
52  
53 25 not vary significantly over time across medical specialties (data not shown).  
54  
55 26  
56 27  
57  
58  
59  
60

## 1 **Changes in JSS in the longitudinal sample**

### 2 *All doctors*

3 Using paired sample t-tests, JSS scores were found to change non-significantly from 2010 to 2012  
 4 (5.30 vs. 5.34;  $t=1.43$ ;  $p=0.152$ ), to increase significantly from 2012 to 2014 (5.34 vs. 5.41;  $t=2.19$ ;  
 5  $p=0.029$ ) and then to decrease significantly from 2014 to 2016-17 (5.41 vs. 5.34;  $t=-2.03$ ;  $p=0.043$ ).

### 7 *Hospital doctors, GPs and private practice specialists*

8 From 2010 to 2016-17 in the longitudinal subsample, the JSS scores for GPs decreased steadily. A  
 9 significant increase in JSS was found for specialists in private practice from 2010 to 2012, and for  
 10 hospital doctors from 2012 to 2014. For all three job positions, there was a non-significant decline in  
 11 JSS from 2014 to 2016-17. At any point in time, private practice specialists were the most satisfied.  
 12 GPs were more satisfied than hospital doctors, but the difference between these groups decreased.

### 14 Figure 2

## 16 **Changes on the item level**

17 For GPs and doctors in hospital, the item scores on "freedom to choose methods", "recognition for  
 18 good work", "rate of pay" and "work hours" decreased significantly from 2010 to 2016-17. Also, GPs  
 19 reported significantly lower scores for "amount of responsibility" and "overall JSS". No significant  
 20 changes on the item level were found for private practice specialists and for doctors in academia.

### 22 Table 2

24 The same pattern was found in the longitudinal subsample for GPs and hospital doctors, although not  
 25 statistically significant.

### 26 Table 3

## 1 DISCUSSION

### 2 Main findings

3 From 2010 to 2016-17, JSS for all doctors decreased significantly. The decrease was statistically  
4 significant for GPs and for hospital doctors. Private practice specialists were most satisfied, followed  
5 by GPs and hospital doctors. The difference between the GPs and the private practice specialist  
6 increased over time. Of the ten JSS items "working hours", "payment", "recognition for good work"  
7 and "freedom to choose methods of work" declined significantly, both among GPs and hospital  
8 doctors, while no significant changes were found for specialists in private practice and doctors in  
9 academia (Table 2, Figure 1). In the longitudinal subsample, there was a non-significant decline in JSS  
10 for GPs, hospital doctors and private practice specialists from 2014 to 2016-17 (Figure 2).

### 12 Comparison with other studies

13 Differences in methodology limit direct comparisons with other studies. However, it is possible to  
14 point out some international trends in job satisfaction; older doctors report higher job satisfaction, and  
15 there are no gender differences.<sup>20 22 29 39</sup> Age changes in satisfaction are related to the lowered  
16 expectations over time, higher remuneration, higher perceived autonomy and more experience.<sup>21 44 45</sup>

17  
18 In Norway, JSS was stable and high from 1994 to 2002,<sup>20</sup> increased from 2000 to 2006,<sup>21</sup> and  
19 decreased from 2010 to 2016-17. However, it was still at a relatively high level in 2016-17, higher  
20 than in 2000, 2002, 2004 and lower than in 2006.<sup>20</sup> Longitudinal studies on doctors' job satisfaction  
21 are few and show a mixed pattern. A study on doctors' intention to work in the UK suggested a  
22 decrease in their satisfaction. The fraction of UK-trained doctors who would "probably not" or  
23 "definitely not" practice medicine in the UK increased from 8% in 1996-2011 to 15% in 2015.<sup>23</sup>  
24 Decreasing professional satisfaction were also described among doctors in the US.<sup>24</sup> On the other  
25 hand, increased satisfaction with work has been reported from doctors in the Netherlands from 2000 to  
26 2009<sup>46</sup> and from six graduation cohorts from 1996 to 2012 in the UK.<sup>47</sup> High levels of job satisfaction  
27 were documented from emergency medicine residents in the US,<sup>48</sup> family physicians in Canada,<sup>49</sup>  
28 primary care physicians in Germany,<sup>50</sup> and doctors in Australia.<sup>51</sup>

1  
2  
3 1  
4  
5 2 Norwegian studies showed statistically significant higher job satisfaction for GPs than for hospital  
6  
7 3 doctors from 2000 to 2006 and in 2008, and no significant differences between GPs and private  
8  
9 4 practice specialist in 2008.<sup>21 22</sup> In our study, JSS decreased significantly for GPs and hospital doctors,  
10  
11 5 but GPs continued with higher scores than their hospital colleagues. GPs and private practice  
12  
13 6 specialists had similar levels of satisfaction in 2010, while the scores were significantly higher for  
14  
15 7 private practice specialist in 2012, 2014 and 2016-17 (Figure 1 with table).  
16  
17  
18 8

19  
20 9 Decline in GP job satisfaction seems to be the rule all over the world. A Danish study showed that the  
21  
22 10 proportion of GPs reporting dissatisfaction with work increased from 6% in 2012 to 22% in 2016. A  
23  
24 11 significant increase in dissatisfaction was found for "working hours", "rate of pay", "freedom to  
25  
26 12 choose methods" and "recognition for good work".<sup>26</sup> The National GP Worklife Survey in the UK  
27  
28 13 documented that satisfaction with "colleagues and fellow workers" improved, while the other nine  
29  
30 14 aspects of job declined from 2010 to 2017. The largest decreases were "working hours", "rate of pay"  
31  
32 15 and "amount of responsibility".<sup>25</sup> The MABEL survey among doctors in Australia also showed a  
33  
34 16 decline from 2013 to 2015 in GP job satisfaction.<sup>27</sup>  
35  
36  
37 17

38  
39 18 According to a recent systematic review on satisfaction of doctors working in hospitals within the  
40  
41 19 European Union based on studies from 2000 to 2017, hospital doctors had a moderate job satisfaction;  
42  
43 20 4.81 on a scale from 1 to 7.<sup>52</sup> In our sample, hospital doctors reported higher levels of satisfaction:  
44  
45 21 5.14 in 2010 and 5.00 in 2016-17.  
46  
47 22

48  
49 23 In the Norwegian "Working environment and living conditions survey" from 2010 to 2016, there were  
50  
51 24 no changes in JSS as measured by a five point Likert scale from very dissatisfied to very satisfied.  
52  
53 25 About 90% of the employees reported that they are "quite" or "very satisfied" with their job. In data  
54  
55 26 from 2016, top managers (97%), farmers/fisherman (95%) or physiotherapists (95%) reported a higher  
56  
57 27 level and nurses (89%), policeman (88%) or customer service occupations (82%) a lower level of  
58  
59  
60

1  
2  
3 1 satisfaction than the doctors (90%). JSS among employees did not differ between gender and it did  
4  
5 2 increase with age.<sup>53</sup>  
6

#### 7 3 8 9 4 **Explanation of results**

10 5 Health care organisations and financial systems are constantly subject to change in most countries.  
11  
12 6 Studies document that changes in the healthcare organisation may influence doctors' work-life and  
13  
14 7 professional satisfaction.<sup>14 54</sup>  
15  
16 8

17  
18  
19 9 As already mentioned, three major health care reforms have been implemented over the last decade in  
20  
21 10 Norway: "The Coordination Reform" in 2012,<sup>32</sup> the "The Free Choice of Hospital Reform" in 2015<sup>34</sup>  
22  
23 11 and the white paper on "The Future Primary Care – Proximity and Comprehensiveness" in 2015.<sup>35</sup>  
24  
25 12 These reforms are challenging for the doctors, and may explain some of the reduction in satisfaction.  
26  
27 13 Studies showed that high professional autonomy yields better quality of health care and more doctor  
28  
29 14 satisfaction.<sup>18 55</sup> More time spent on direct patient care and less time spent on administrative tasks, and  
30  
31 15 optimal economic conditions in general are also important positive contributors to job satisfaction.<sup>28 56</sup>  
32  
33 16 <sup>57</sup> A study based on data from 1994 to 2014 showed that the total weekly working hours remained  
34  
35 17 unchanged for most doctors in Norway, while time spent on direct patient care decreased, particularly  
36  
37 18 for hospital doctors.<sup>42</sup> Another study with data from 2018 documented long working weeks with a  
38  
39 19 wide variety of tasks among GPs.<sup>58</sup> 70% of doctors experienced stress in association with perpetual  
40  
41 20 reorganisations of the national health care system, particularly hospital doctors.<sup>54</sup> A recent survey on  
42  
43 21 hospital doctors' working conditions documented that hospital doctors scored high on items related to  
44  
45 22 engagement at work, assessment of work as meaningful and cooperation with colleagues, but lower on  
46  
47 23 items related to workload and professional autonomy (including openness, participation in decision  
48  
49 24 making, dialogue with the hospital management).<sup>59</sup> In another recent survey on GPs' working  
50  
51 25 conditions,<sup>60</sup> GPs reported that they have a meaningful job with various interesting tasks. However,  
52  
53 26 they also reported considerable growth both in work demand and in the cost of running their own  
54  
55 27 medical office during the last decade. The high work demand was related to increased transfer of tasks  
56  
57 28 that were previously conducted by outpatient clinics or hospitals, for example follow-up care of  
58  
59  
60



1 pregnant women or patients with chronic diseases like cancer, rheumatic diseases, endocrinological  
2 disease, substance abuse or some mental health disorders. In addition, there were increases in  
3 consultations, laboratory services for appointment specialists, tasks related to preventive treatment and  
4 documentation as well as certification requirements.<sup>60 61</sup>

5  
6 These findings fit well with our data where several aspects of satisfaction declined significantly. For  
7 GPs, the largest decrease was in "amount of responsibility given" followed by "work hours",  
8 "recognition for good clinical work", "rate of pay", "overall job satisfaction", and "freedom to choose  
9 methods of work". For hospital doctors, the decrease was largest in "freedom to choose methods of  
10 work" followed by "rate of pay", "recognition for good clinical work" and "work hours". The high job  
11 satisfaction of specialists in private practice probably reflects both professional and time-based  
12 autonomy and good economic conditions.

13  
14 In the longitudinal subsample (the doctors who responded at all four points in time and did not change  
15 job position), there were no significant changes neither on the item level nor on estimated JSS from  
16 2010 to 2016-17 (Table 3). A common tendency for GPs, hospital doctors and private practice  
17 specialist was a non-significant decrease in job satisfaction from 2014 to 2016-17 (Figure 2). A  
18 possible reason for this stability in JSS may be a combination of the adaption of health care  
19 regulations over time and the selection of doctors. The most satisfied doctors are more likely to remain  
20 in their current job position.

21  
22 Changes in professional culture may also explain some of the reduced satisfaction. In a study among  
23 hospital doctors in Norway, many senior consultants talked about being a doctor as a major part of  
24 their identity and lifestyle, while the specialty registrars were more likely to regard their work as a  
25 job.<sup>62</sup> In another study, most doctors were satisfied as doctors, but felt it challenging to combine the  
26 job with leisure activities and family life. Some senior consultants were of the opinion that specialty  
27 registrars were less willing to prioritize professional life and more concerned with their responsibilities  
28 outside of work.<sup>63</sup>

1  
2  
3 1  
4  
5 2 The slightly increasing trend in job satisfaction among all Norwegian doctors described from 2000 to  
6  
7 3 2006<sup>21</sup> did not continue from 2010 to 2016-17. However, the job satisfaction level was still above 5 on  
8  
9 4 a 1 to 7 scale. In surveys from 2018, GPs and hospital doctors described their work as meaningful in  
10  
11 5 spite of considerable work overload.<sup>59 60</sup> This suggests that job satisfaction is also based on internal  
12  
13 6 values. To be in demand and to treat patients were also fundamental elements of doctor satisfaction.<sup>64</sup>  
14  
15 7

### 8 **Strengths and limitations**

9 The main strength of this study is that it allows for generalisation to the whole population of doctors in  
10 Norway. Similarities in survey methods and repeated measures should also be pointed out.

11 Furthermore, the response rates were fairly good, ranging from 67% and 75%, which are higher than  
12 for other surveys of the medical profession, but do not rule out the possibility of non-response bias.<sup>42</sup>

13 However, analyses in Table 2 and 3 show no significant differences in the JSS scores between the  
14 longitudinal sample and the unbalanced cohort. The ten item Warr-Cook-Wall scale for job  
15 satisfaction was specifically designed for GPs in solo practice in the UK,<sup>6 38</sup> but it has been used  
16 extensively to describe total job satisfaction and satisfaction of different level of work in doctor  
17 populations both in Norway and elsewhere.<sup>19-22 28-30 40</sup> The validation of this ten item job satisfaction  
18 scale in a cohort of Australian medical practitioners provided validity evidence for a single-factor  
19 solution and for a use of a composite job satisfaction score. However, it was suggested to include other  
20 job-specific items in the scale, especially for doctors having employee status or working in  
21 organisational settings.<sup>43</sup>

### 23 **Conclusion**

24 Job satisfaction for Norwegian doctors remained relatively high, but with a downward trend over the  
25 last eight years, where the decrease was statistically significant for GPs and hospital doctors. Private  
26 practice specialists were most satisfied, followed by GPs and hospital doctors. The difference between  
27 the GPs and the private practice specialists increased over time. While no significant changes were  
28 found in the ten JSS items for private practice specialists and doctors in academia, satisfaction with

1 "working hours", "payment", "recognition for good work" and "freedom to choose methods of work"  
2 declined significantly both among GPs and hospital doctors. Several health care reforms and  
3 regulations over the last decade and changes in the professional culture may explain some of the  
4 reduced satisfaction.

## 6 **Future research and policy implications**

7 Variations in job satisfaction across job positions call for more separate analyses in the future. The  
8 importance of a good professional climate is emphasized in both Norwegian and European working  
9 conditions legislature.<sup>65 66</sup> High job satisfaction among doctors is important. It has been found to relate  
10 positively to doctors well-being and quality of health care.<sup>9-14</sup> In addition, job satisfaction is an  
11 important factor for career decisions like staying in or leaving a current job position.<sup>3 67</sup> Low  
12 recruitment to primary care is a concurrent issue in media,<sup>68</sup> health administration<sup>69</sup> and research,<sup>33 70</sup>  
13 therefore better job satisfaction is important. This could be achieved through regulation of working  
14 hours, improvement of recognition for medical work regarding payment and feedback for good work.

1  
2  
3 1 **Declarations**  
4

5 2

6  
7 3 **Acknowledgements** The authors wish to thank all doctors who have supported this study by  
8  
9 4 participating in the survey.  
10

11 5

12  
13 6 **Contributors** JR, OGA and MN designed the study. JR undertook the literature review, did the  
14  
15 7 statistical analysis and wrote the first draft. OGA and MN made critical revisions. All authors had full  
16  
17 8 access to all of the data (including statistical reports and tables) and are jointly responsible for the  
18  
19 9 integrity of the data and the accuracy of the data analysis.  
20  
21

22 10

23  
24 11 **Funding** This research received no specific grant from any funding agency in the public,  
25  
26 12 commercial, or not-for-profit sectors.  
27

28 13

29  
30 14 **Competing interest** None declared.  
31  
32

33 15

34  
35 16 **Ethics approval** According to the Regional Committee for Medical Research Ethics, the study based  
36  
37 17 on “Norwegian Physician Survey - A bi-annual prospective questionnaire survey to a representative  
38  
39 18 sample of Norwegian physicians” is exempt from review in Norway, cf. §§ 4 of The Act. The project  
40  
41 19 can be implemented without the approval by the Regional Committee for Medical Research Ethics  
42  
43 20 (IRB 0000 1870). Additionally, approval for data protection of the bi-annual prospective survey  
44  
45 21 among Norwegian doctors was obtained from the Norwegian Social Science Data Service (Reference  
46  
47 22 19521).  
48

49 23

50  
51 24 **Data sharing statement** The authors may be able to provide aggregated data on which the analysis is  
52  
53 25 based, on request. No additional data available.  
54

55 26

56  
57 27 **Patient consent** N/A  
58  
59  
60 28

1  
2  
3 1 **STROBE Statement:** The authors confirm that they have followed the list of the STROBE  
4  
5 2 Statement (BMJ 2007;335:806-808).  
6  
7 3

8  
9 4 **Transparency declaration:** The lead author (Judith Rosta) affirms that the manuscript is an honest,  
10  
11 5 accurate, and transparent account of the study being reported; that no important aspects of the study  
12  
13 6 have been omitted; and that any discrepancies from the study as planned (and, if relevant, registered)  
14  
15 7 have been explained.  
16  
17 8

18  
19  
20  
21  
22  
23  
24  
25  
26  
27  
28  
29  
30  
31  
32  
33  
34  
35  
36  
37  
38  
39  
40  
41  
42  
43  
44  
45  
46  
47  
48  
49  
50  
51  
52  
53  
54  
55  
56  
57  
58  
59  
60

For peer review only

1  
2  
3  
4  
5  
6  
7  
8  
9  
10  
11  
12  
13  
14  
15  
16  
17  
18  
19  
20  
21  
22  
23  
24  
25  
26  
27  
28  
29  
30  
31  
32  
33  
34  
35  
36  
37  
38  
39  
40  
41  
42  
43  
44  
45  
46  
47  
48  
49  
50  
51  
52  
53  
54  
55  
56  
57  
58  
59  
60

1 **Figure legends**

2

3 Figure 1 GLM estimated means of job satisfaction (scored from 1 to 7) controlled for  
4 age and gender among doctors in different job positions in 2010, 2012, 2014  
5 and 2016-17

6

7 Figure 2 GLM estimated means of job satisfaction (scored from 1 to 7) controlled for  
8 age and gender among doctors in different job positions in 2010, 2012, 2014  
9 and 2016-17 with paired t-tests (the longitudinal subsample)

For peer review only

**Table 1** Sample, number of respondents, response rates and the makeup of job categories for respondents where we have data on job satisfaction, gender and age

|         | Sample<br>(n) | Respondents <sup>(a)</sup><br>(n) | Response<br>rate<br>(%) | Job categories (n / %) |                        |                          |                                       |                        |                                  |                                          |                         |
|---------|---------------|-----------------------------------|-------------------------|------------------------|------------------------|--------------------------|---------------------------------------|------------------------|----------------------------------|------------------------------------------|-------------------------|
|         |               |                                   |                         | All <sup>(b)</sup>     | Doctors in<br>hospital | General<br>practitioners | Specialists<br>in private<br>practice | Doctors in<br>academia | Community<br>medical<br>officers | Doctors in<br>administrative<br>position | Other job<br>categories |
| 2010    | 1 520         | 1 014                             | 66.7                    | 948                    | 536 (56.4)             | 219 (23.1)               | 57 (6.0)                              | 61 (6.4)               | 24 (2.5)                         | 19 (2.0)                                 | 32 (3.4)                |
| 2012    | 1 792         | 1 279                             | 71.4                    | 1 164                  | 680 (58.4)             | 257 (22.1)               | 60 (5.2)                              | 67 (5.8)               | 38 (3.3)                         | 30 (2.6)                                 | 32 (2.8)                |
| 2014    | 1 545         | 1 158                             | 75.0                    | 1 057                  | 618 (58.5)             | 223 (21.1)               | 60 (5.8)                              | 60 (5.7)               | 38 (3.6)                         | 28 (2.7)                                 | 30 (2.8)                |
| 2016-17 | 2 195         | 1 604                             | 73.1                    | 1 290                  | 772 (59.8)             | 263 (20.4)               | 52 (4.0)                              | 64 (5.0)               | 55 (4.3)                         | 30 (2.3)                                 | 54 (4.2)                |

(a) Number of respondents with no data on job satisfaction or gender or age or job position were 66 in 2010, 115 in 2012, 101 in 2014 and 146 in 2016-17.

(b) Since interns were only identified in data 2016-17 (n=168), this category is excluded in this paper.

**Table 2 GLM on estimated means, controlled for gender and age, of the 10 job satisfaction scale items (each scored from 1 to 7) among doctors in different type of work in 2010 and 2016-17. Statistically significant differences (95% CI does not overlap) are in bold**

|                                  | General practitioners   |                         | Doctors in hospital     |                         | Specialists in private practice |                   | Doctors in academia |                   |
|----------------------------------|-------------------------|-------------------------|-------------------------|-------------------------|---------------------------------|-------------------|---------------------|-------------------|
|                                  | means (95 % CI)         |                         | means (95 % CI)         |                         | means (95 % CI)                 |                   | means (95 % CI)     |                   |
| Satisfied with ....              | 2010<br>(n=219)         | 2016-17<br>(n=263)      | 2010<br>(n=536)         | 2016-17<br>(n=772)      | 2010<br>(n=57)                  | 2016-17<br>(n=52) | 2010<br>(n=61)      | 2016-17<br>(n=64) |
| Amount of responsibility given   | <b>5.36 (5.19-5.53)</b> | <b>4.73 (4.57-4.90)</b> | 5.28 (5.17-5.38)        | 5.19 (5.09-5.29)        | 5.78 (5.44-6.10)                | 5.65 (5.28-6.03)  | 5.81 (5.49-6.12)    | 5.75 (5.41-6.08)  |
| Variation in work                | 5.80 (5.65-5.95)        | 5.60 (5.45-5.75)        | 5.40 (5.30-5.50)        | 5.25 (5.16-5.34)        | 5.30 (5.00-5.60)                | 5.16 (4.82-5.51)  | 5.76 (5.48-6.05)    | 5.50 (5.19-5.80)  |
| Colleagues and fellow workers    | 5.90 (5.76-6.05)        | 5.73 (5.58-5.87)        | 5.56 (5.47-5.65)        | 5.69 (5.60-5.77)        | 5.63 (5.34-5.91)                | 5.46 (5.13-5.79)  | 5.44 (5.18-5.71)    | 5.49 (5.19-5.78)  |
| Physical working conditions      | 5.60 (5.43-5.77)        | 5.47 (5.31-5.64)        | 4.81 (4.70-4.92)        | 4.77 (4.67-4.87)        | 5.52 (5.18-5.86)                | 5.32 (4.95-5.69)  | 4.76 (4.44-5.09)    | 5.15 (4.82-5.48)  |
| Opportunities to use abilities   | 5.90 (5.75-6.05)        | 5.62 (5.47-5.77)        | 5.46 (5.36-5.56)        | 5.36 (5.28-5.45)        | 5.79 (5.50-6.09)                | 5.74 (5.40-6.08)  | 6.10 (5.82-6.38)    | 5.93 (5.62-6.23)  |
| Overall job satisfaction         | <b>5.88 (5.74-6.01)</b> | <b>5.49 (5.35-5.63)</b> | 5.51 (5.42-5.60)        | 5.40 (5.32-5.48)        | 5.94 (5.66-6.21)                | 5.86 (5.55-6.17)  | 5.84 (5.58-6.10)    | 5.78 (5.50-6.06)  |
| Freedom to choose method of work | <b>5.66 (5.50-5.82)</b> | <b>5.34 (5.18-5.49)</b> | <b>4.97 (4.87-5.07)</b> | <b>4.67 (4.58-4.76)</b> | 5.90 (5.59-6.22)                | 5.70 (5.35-6.05)  | 5.73 (5.43-6.03)    | 5.67 (5.36-5.99)  |
| Recognition for good work        | <b>5.38 (5.20-5.55)</b> | <b>4.83 (4.66-5.01)</b> | <b>4.82 (4.71-4.94)</b> | <b>4.59 (4.49-4.69)</b> | 5.50 (5.14-5.85)                | 5.41 (5.01-5.81)  | 5.26 (4.92-5.59)    | 5.20 (4.84-5.55)  |
| Rate of pay                      | <b>5.40 (5.23-5.57)</b> | <b>4.92 (4.75-5.09)</b> | <b>4.94 (4.83-5.05)</b> | <b>4.68 (4.58-4.77)</b> | 5.66 (5.32-6.00)                | 5.67 (5.29-6.04)  | 3.94 (3.62-4.27)    | 4.51 (4.17-4.85)  |
| Work hours                       | <b>4.56 (4.37-4.74)</b> | <b>4.00 (3.82-4.18)</b> | <b>4.61 (4.49-4.73)</b> | <b>4.38 (4.27-4.48)</b> | 5.41 (5.04-5.78)                | 5.34 (4.93-5.75)  | 4.86 (4.50-5.21)    | 5.49 (5.13-5.86)  |
| JSS                              | <b>5.54 (5.43-5.65)</b> | <b>5.17 (5.07-5.28)</b> | <b>5.14 (5.07-5.21)</b> | <b>5.00 (4.94-5.06)</b> | 5.64 (5.42-5.86)                | 5.53 (5.29-5.77)  | 5.35 (5.14-5.56)    | 5.45 (5.23-5.66)  |



**Table 3 GLM on estimated means, controlled for gender and age, of the ten JSS items (each scored from 1 to 7) among doctors in different type of work in the longitudinal sample in 2010 and 2016-17. Statistically significant differences (95% CI do not overlap) are in bold**

|                                  | General practitioners |                         | Specialists in private practice |                   | Doctors in hospital |                    |
|----------------------------------|-----------------------|-------------------------|---------------------------------|-------------------|---------------------|--------------------|
|                                  | means (95 % CI)       |                         | means (95 % CI)                 |                   | means (95 % CI)     |                    |
| <b>Satisfied with ....</b>       | 2010<br>(n=94)        | 2016-17<br>(n=94)       | 2010<br>(n=22)                  | 2016-17<br>(n=22) | 2010<br>(n=233)     | 2016-17<br>(n=233) |
| Amount of responsibility given   | 5.35 (5.09-5.61)      | <b>4.87 (4.57-5.18)</b> | 5.35 (5.20-5.50)                | 5.21 (5.03-5.39)  | 5.96 (5.55-6.36)    | 5.82 (5.18-6.46)   |
| Variation in work                | 5.84 (5.61-6.07)      | 5.92 (5.73-6.10)        | 5.41 (5.27-5.55)                | 5.44 (5.29-5.59)  | 5.05 (4.91-5.48)    | 5.27 (4.72-5.83)   |
| Colleagues and fellow workers    | 5.95 (5.74-6.16)      | 5.87 (5.67-6.08)        | 5.63 (5.50-5.77)                | 5.58 (5.54-5.82)  | 5.73 (5.32-6.13)    | 5.68 (4.99-6.37)   |
| Physical working conditions      | 5.68 (5.46-5.90)      | 5.70 (5.48-5.93)        | 4.75 (4.58-4.92)                | 4.90 (4.73-5.06)  | 5.86 (5.38-6.35)    | 5.91 (5.35-6.47)   |
| Opportunities to use abilities   | 5.87 (5.65-6.10)      | 6.03 (5.85-6.21)        | 5.52 (5.38-5.65)                | 5.56 (5.40-5.71)  | 5.77 (5.42-6.12)    | 6.14 (5.53-6.74)   |
| Overall job satisfaction         | 5.95 (5.77-6.13)      | 5.70 (5.51-5.90)        | 6.05 (5.70-6.40)                | 5.96 (5.35-6.56)  | 5.54 (5.42-5.66)    | 5.44 (5.30-5.58)   |
| Freedom to choose method of work | 5.75 (5.55-5.95)      | 5.48 (5.27-5.69)        | 6.05 (5.63-6.46)                | 5.91 (5.30-6.52)  | 4.98 (4.82-5.14)    | 4.96 (4.80-5.13)   |
| Recognition for good work        | 5.40 (5.16-5.65)      | 5.15 (4.89-5.41)        | 5.50 (5.09-5.92)                | 5.77 (5.20-6.34)  | 4.91 (4.74-5.09)    | 4.79 (4.61-4.98)   |
| Rate of pay                      | 5.47 (5.24-5.70)      | 5.16 (4.90-5.42)        | 5.91 (5.52-6.30)                | 6.00 (5.44-6.56)  | 4.97 (4.79-5.14)    | 4.90 (4.74-5.06)   |
| Work hours                       | 4.49 (4.19-4.79)      | 3.92 (3.59-4.24)        | 5.46 (4.89-6.02)                | 5.63 (5.04-6.24)  | 4.52 (4.34-4.70)    | 4.48 (4.30-4.76)   |
| <b>JSS</b>                       | 5.58 (5.42-5.73)      | 5.38 (5.23-5.53)        | 5.73 (5.52-5.95)                | 5.81 (5.32-6.30)  | 5.16 (5.06-5.26)    | 5.14 (5.03-5.25)   |

1  
2  
3 **References**

- 4 2 1. Bakotic D. Relationship between job satisfaction and organisational performance.  
5 3 *Economic Research-Ekonomska Istraživanja* 2016;29(1):118-30.
- 6 4 2. Jaarsveld Dv, Keyser E. The Moderating Role of Job Satisfaction on Workplace  
7 5 Absenteeism and Substance use amongst the Employees at a Power Utility in  
8 6 Mpumalanga. *Journal of Economics and Behavioral Studies* 2018(2):219-30.
- 9 7 3. Scanlan JN, Still M. Relationships between burnout, turnover intention, job satisfaction, job  
10 8 demands and job resources for mental health personnel in an Australian mental health  
11 9 service. *BMC Health Services Research* 2019;19(1):62.
- 12 10 4. Coetzee N, Maree DJ, Smit BN. The relationship between chronic fatigue syndrome,  
13 11 burnout, job satisfaction, social support and age among academics at a tertiary  
14 12 institution. *International Journal of Occupational Medicine and Environmental*  
15 13 *Health* 2019;32(1):75-85.
- 16 14 5. Faragher EB, Cass M, Cooper CL. The relationship between job satisfaction and health: a  
17 15 meta-analysis. *Occupational and Environmental Medicine* 2005;62(2):105-12.
- 18 16 6. Warr P, Cook J, Wall T. Scales for the measurement of some work attitudes and aspects of  
19 17 psychological well-being. *Journal of Occupational Psychology* 1979;2(52):129-48.
- 20 18 7. Wallace JE, Lemaire JB, Ghali WA. Physician wellness: a missing quality indicator. *Lancet*  
21 19 2009;374(9702):1714-21.
- 22 20 8. Shanafelt TD, Noseworthy JH. Executive Leadership and Physician Well-being. *Mayo*  
23 21 *Clinic Proceedings* 2017;92(1):129-46.
- 24 22 9. Wallace JE, Lemaire J. Physician well being and quality of patient care: an exploratory  
25 23 study of the missing link. *Psychol Health Med* 2009;14(5):545-52.
- 26 24 10. Firth-Cozens J. Interventions to improve physicians' well-being and patient care. *Soc Sci*  
27 25 *Med* 2001;52 (2):223-5.
- 28 26 11. Friedberg M, Chen P, Van Busum K, et al. Factors Affecting Physician Professional  
29 27 Satisfaction and Their Implications for Patient Care, Health Systems, and Health  
30 28 Policy. Santa Monica: RAND Corporation, 2013.
- 31 29 12. Casalino L, Crosson F. Physician Satisfaction and Physician Well-Being: Should Anyone  
32 30 Care? *Professions and Professionalism* 2015;5(1):1-12.
- 33 31 13. Angerer P, Weigl M. Physicians' psychosocial work conditions and quality of care: A  
34 32 literature review. *Professions and Professionalism* 2015;5(1):1-20.
- 35 33 14. McKinlay J, Marceau L. New wine in an old bottle: does alienation provide an  
36 34 explanation of the origins of physician discontent? *International Journal of Health*  
37 35 *Services* 2011;41(2):301-35.
- 38 36 15. Murray A, Montgomery JE, Chang H, et al. Doctor Discontent. *Journal of General*  
39 37 *Internal Medicine* 2001;16(7):452-59.
- 40 38 16. Sturm R. Effect of managed care and financing on practice constraints and career  
41 39 satisfaction in primary care. *J Am Board Fam Pract* 2002;15(5):367-77.
- 42 40 17. Linzer M, Konrad TR, Douglas J, et al. Managed Care, Time Pressure, and Physician Job  
43 41 Satisfaction: Results from the Physician Worklife Study. *Journal of General Internal*  
44 42 *Medicine* 2000;15(7):441-50.
- 45 43 18. Landon BE, Reschovsky J, Blumenthal D. Changes in career satisfaction among primary  
46 44 care and specialist physicians, 1997–2001. *JAMA* 2003;289(4):442-9.
- 47 45 19. Tyssen R, Palmer KS, Solberg IB, et al. Physicians' perceptions of quality of care,  
48 46 professional autonomy, and job satisfaction in Canada, Norway, and the United States.  
49 47 *BMC Health Services Research* 2013;13(1):516.
- 50 48 20. Nylenna M, Gulbrandsen P, Førde R, et al. Unhappy doctors? A longitudinal study of life  
51 49 and job satisfaction among Norwegian doctors 1994-2002. *BMC Health Services*  
52 50 *Research* 2005;5:44.

- 1 21. Aasland OG, Rosta J, Nylenna M. Healthcare reforms and job satisfaction among doctors  
2 in Norway. *Scandinavian Journal of Public Health* 2010;38(3):253-8.
- 3 22. Nylenna M, Aasland OG. Jobbtilfredshet blant norske leger (Job satisfaction among  
4 Norwegian doctors). *Tidsskrift for Den norske legeforening* 2010;130(10):1028-31.
- 5 23. Surman G, Goldacre MJ, Lambert TW. UK-trained junior doctors' intentions to work in  
6 UK medicine: questionnaire surveys, three years after graduation. *Journal of the Royal  
7 Society of Medicine* 2017;110(12):493-500.
- 8 24. Crosson F, Casalino L. Physician Dissatisfaction in the United States: An Examination.  
9 *Professions and Professionalism* 2015;5(1):1-12.
- 10 25. Gibson J, Sutton M, Spooner S, et al. Ninth National GP Worklife Survey 2017.  
11 Manchester: University of Manchester.  
12 [http://blogs.lshhtm.ac.uk/prucomm/files/2018/05/Ninth-National-GP-Worklife-  
13 Survey.pdf](http://blogs.lshhtm.ac.uk/prucomm/files/2018/05/Ninth-National-GP-Worklife-Survey.pdf).
- 14 26. Pedersen Fischer A, Busk Nørøxe K, Bro F, et al. Alment praktiserende lægers psykiske  
15 arbejdsmiljø og jobtilfredshed 2016 (General Practitioners' psychological work  
16 environment and job satisfaction 2016). Aarhus: Forskningsenheden for Almen  
17 Praksis-Aarhus Universitet, 2016.
- 18 27. Scott A. General practice trends. Melbourne: ANZ-Melbourne Institute Health Sector,  
19 2017. [https://mabel.org.au/\\_data/assets/pdf\\_file/0005/2334551/ANZ-MI-Health-  
20 Sector-Report.pdf](https://mabel.org.au/_data/assets/pdf_file/0005/2334551/ANZ-MI-Health-Sector-Report.pdf).
- 21 28. Rosta J, Nylenna M, Aasland OG. Job satisfaction among hospital doctors in Norway and  
22 Germany. A comparative study on national samples. *Scandinavian Journal of Public  
23 Health* 2009;37(5):503-8.
- 24 29. Voltmer E, Rosta J, Siegrist J, et al. Job stress and job satisfaction of physicians in private  
25 practice: comparison of German and Norwegian physicians. *International Archives of  
26 Occupational and Environmental Health* 2012;85(7):819-28.
- 27 30. Solberg IB, Tómasson K, Aasland O, et al. Cross-national comparison of job satisfaction  
28 in doctors during economic recession. *Occup Med (Lond)* 2014;64(8):595-600.
- 29 31. Steihaug S, Paulsen B, Melby L. Norwegian general practitioners' collaboration with  
30 municipal care providers – a qualitative study of structural conditions. *Scandinavian  
31 Journal of Primary Health Care* 2017;35(4):344-51.
- 32 32. Ringard Å, Sagan A, Sperre Saunes I, et al. Norway: Health system review. *Health  
33 Systems in Transition* 2013;15(8):1-162.
- 34 33. Kjosavik SR. Ongoing recruitment crisis In Norwegian general practice. *Scandinavian  
35 Journal of Primary Health Care* 2018;36(2):107-08.
- 36 34. Ringard Å, Saunes IS, Sagan A. The 2015 hospital treatment choice reform in Norway:  
37 Continuity or change? *Health Policy* 2016;120(4):350-55.
- 38 35. NMHC. Fremtidens primærhelsetjeneste – nærhet og helhet (The future primary care –  
39 proximity and comprehensiveness). Oslo: Norwegian Ministry of Health and Care  
40 Services, 2015.
- 41 36. Hora GPR, Ribas Júnior R, de Souza MA. State of the Art of Job Satisfaction Measures:  
42 A Systematic Review. *Trends in Psychology* 2018;26:971-86.
- 43 37. Konrad T. Measures, Methods, and Models of Doctor Satisfaction: Future Research  
44 Challenges. *Professions and Professionalism* 2015;5(1):1-16.
- 45 38. Cooper CL, Rout U, Faragher B. Mental health, job satisfaction, and job stress among  
46 general practitioners. *BMJ* 1989;298(6670):366-70.
- 47 39. Rosta J, Gerber A. Arbeitszufriedenheit der Krankenhausärzten und -ärztinnen.  
48 Ergebnisse einer bundesweiten Erhebung im Herbst 2006 (Job satisfaction of hospital  
49 doctors. Results of a study of a national sample of hospital doctors in Germany).  
50 *Gesundheitswesen* 2008;70(8-9):519-24.

- 1  
2  
3 1 40. Goetz K, Campbell SM, Steinhäuser J, et al. Evaluation of job satisfaction of practice  
4 2 staff and general practitioners: an exploratory study. *BMC Family Practice*  
5 3 2011;12(1):137.  
6 4  
7 4 41. Rosta J, Aasland OG. Weekly working hours for Norwegian hospital doctors since 1994  
8 5 with special attention to postgraduate training, work-home balance and the European  
9 6 Working Time Directive: a panel study. *BMJ Open* 2014;4(10).  
10 7  
11 8 42. Rosta J, Aasland OG. Doctors' working hours and time spent on patient care in the period  
12 9 1994 - 2014. *Tidsskrift for Den norske legeforening* 2016;136(16):1355-9.  
13 10  
14 11 43. Hills D, Joyce C, Humphreys J. Validation of a Job Satisfaction Scale in the Australian  
15 12 Clinical Medical Workforce. *Evaluation & the Health Professions* 2012;35(1):47-76.  
16 13  
17 14 44. Falkum E. Psychosocial Work-Environment and Job Satisfaction. In: Larsen Ø, ed. The  
18 15 shaping of a profession Physicians in Norway, Past and Present. Canton: Science  
19 16 History Publications, 1996:481-90.  
20 17  
21 18 45. Finset KB, Gude T, Hem E, et al. Which young physicians are satisfied with their work?  
22 19 A prospective nationwide study in Norway. *BMC Medical Education* 2005;5(1):19.  
23 20  
24 21 46. Schmit Jongbloed L. Physician job satisfaction in the Netherlands. Groningen: University  
25 22 of Groningen, 2017.  
26 23  
27 24 47. Surman G, Lambert TW, Goldacre M. Doctors' enjoyment of their work and satisfaction  
28 25 with time available for leisure: UK time trend questionnaire-based study.  
29 26 *Postgraduate Medical Journal* 2016;92(1086):194-200.  
30 27  
31 28 48. Perina DG, Marco CA, Smith-Coggins R, et al. Well-Being among Emergency Medicine  
32 29 Resident Physicians: Results from the ABEM Longitudinal Study of Emergency  
33 30 Medicine Residents. *Journal of Emergency Medicine* 2018;55(1):101-09.  
34 31  
35 32 49. Malhotra J, Wong E, Thind A. Canadian family physician job satisfaction - is it changing  
36 33 in an evolving practice environment? An analysis of the 2013 National Physician  
37 34 Survey database. *BMC Family Practice* 2018;19(1):100.  
38 35  
39 36 50. Behmann M, Schmiemann G, Lingner H, et al. Job Satisfaction Among Primary Care  
40 37 Physicians: Results of a Survey. *Deutsches Ärzteblatt International* 2012;109(11):193-  
41 38 200.  
42 39  
43 40 51. Joyce C, Schurer S, Scott A, et al. Australian doctors' satisfaction with their work: results  
44 41 from the MABEL longitudinal survey of doctors. *Med J Aust* 2011;194(1):30-33.  
45 42  
46 43 52. Domagala A, Bała MM, Storman D, et al. Factors Associated with Satisfaction of  
47 44 Hospital Physicians: A Systematic Review on European Data. *International journal of*  
48 45 *environmental research and public health* 2018;15(11):2546.  
49 46  
50 47 53. NOA. Jobtilfredshet (Job satisfaction) Oslo: NOA (Nasjonal overvåking av  
51 48 arbeidsmiljø), 2016.  
52 49 [https://noa.stami.no/arbeidsmiljoindikatorer/psykososialtorganisasjon/jobtilfredshet](https://noa.stami.no/arbeidsmiljoindikatorer/psykososialtorganisasjon/jobtilfredshet/1/tilfredshet/)  
53 50 [1/tilfredshet/](https://noa.stami.no/arbeidsmiljoindikatorer/psykososialtorganisasjon/jobtilfredshet/1/tilfredshet/).  
54 51  
55 52 54. Førde R, Aasland O. Moralsk stress og faglig ytringsfrihet blant leger (Moral distress and  
56 53 professional freedom of speech among doctors). *Tidsskrift for Den norske legeforening*  
57 54 2013;12-13(133):1310-13.  
58 55  
59 56 55. Stoddard JJ, Hargraves JL, Reed M, et al. Managed care, professional autonomy, and  
60 57 income: effects on physician career satisfaction. *J Gen Intern Med* 2001;16.  
61 58  
62 59 56. Dugdale D, Epstein R, Pantilat S. Time and the patient-physician relationship. *Journal of*  
63 60 *General Internal Medicine* 1999(Suppl.1):S34-40.  
64  
65 57 57. Bovier P, Perneger T. Predictors of work satisfaction among physicians. *European*  
66 *Journal of Public Health* 2003;13(4):299-305.  
67  
68 58 58. Rebnord IK, Eikeland OJ, Hunskår S, et al. Fastlegers tidsbruk (GPs working time).  
69 Bergen: Nasjonalt kompetansesenter for legevaktmedisin, Uni Research Helse, 2018.  
70

- 1  
2  
3 1 59. Ramboll. Spørreskjemaundersøkelse - sykehuslegers arbeidsforhold 2018 (Survey on  
4 2 hospital doctors working conditions 2018).  
5 3 [https://www.dagensmedisin.no/contentassets/b79cfab99ba6437bb3ccf9efa9ad75aa/sp](https://www.dagensmedisin.no/contentassets/b79cfab99ba6437bb3ccf9efa9ad75aa/sporreundersokelse-om-sykehuslegers-arbeidsforhold-2018.pdf)  
6 4 [orreundersokelse-om-sykehuslegers-arbeidsforhold-2018.pdf](https://www.dagensmedisin.no/contentassets/b79cfab99ba6437bb3ccf9efa9ad75aa/sporreundersokelse-om-sykehuslegers-arbeidsforhold-2018.pdf).  
7 5  
8 60. Tronderopprøret. Trønderopprørets fastlegeundersøkelse og  
9 6 helsemedarbeiderundersøkelse (Survey on GPs and health workers) Trondheim, 2018.  
10 7 <http://www.flo20.no/wp-content/uploads/2018/06/TOundersokelse-2.pdf>.  
11 8  
12 61. Lehn H. Utvikling i bruk av fastlege og legevakt: Analysenotat i Samdata kommune  
13 9 (Development in the use of GP-service and emergency medical service). Oslo:  
14 10 Helsedirektoratet, 2018.  
15 11 62. Hertzberg K, Skirbekk H, Tyssen R, et al. Den gode legen - sterk og utholdende (The  
16 12 good doctor – strong and persevering). *Tidsskrift for Den norske legeforening*  
17 13 2016;136(19):1631-4.  
18 14 63. Hertzberg T, Skirbekk H, Tyssen R, et al. Dagens sykehuslege - fremdeles alltid på vakt  
19 15 (The hospital doctor of today - still continuously on duty). *Tidsskrift for Den norske*  
20 16 *legeforening* 2016;136(19):1635-8.  
21 17  
22 64. Richardsen A, Burke R. Occupational stress and job satisfaction among physicians: sex  
23 18 differences. *Soc Sci Med* 1991;33(10):1179-87.  
24 19  
25 65. Arbeidsdepartementet. Lov om arbeidsmiljø, arbeidstid og stillingsvern - LOV 2005-06-  
26 20 17 nr 62 (Law on working environment, working time and employment protection -  
27 21 2005-06-17 nr 62). Oslo: Arbeidsdepartementet, 2005.  
28 22  
29 66. EU. European Health and Safety Legislation. Article 153 of the Treaty on the Functioning  
30 23 of the European Union: European Union, 1989.  
31 24  
32 67. Landon B, Reschovsky J, Pham H, et al. Leaving medicine: the consequences of physician  
33 25 dissatisfaction. *Med Care* 2009;44(3):234-42.  
34 26  
35 68. Nilsen L. Mange innbyggere har ikke fastlege (Many citizens do not have GP). Oslo:  
36 27 Dagens medisin, 2016.  
37 28  
38 69. Korsvold L, Tønnessen C, Sirnes E, et al. Leger i kommune- og spesialisthelsetjenesten  
39 29 (Doctors in municipal and specialist health service). Oslo: Helsedirektoratet, 2017.  
40 30  
41 70. Gaski M, Abelsen B. Fastlegetjenesten i Nord-Norge (GP service in Northern Norway).  
42 31 Tromsø: NSDM, 2018.  
43 32  
44  
45  
46  
47  
48  
49  
50  
51  
52  
53  
54  
55  
56  
57  
58  
59  
60

1  
2  
3  
4  
5  
6  
7  
8  
9  
10  
11  
12  
13  
14  
15  
16  
17  
18  
19  
20  
21  
22  
23  
24  
25  
26  
27  
28  
29  
30  
31  
32  
33  
34  
35  
36  
37  
38  
39  
40  
41  
42  
43  
44  
45  
46  
47  
48  
49  
50  
51  
52  
53  
54  
55  
56  
57  
58  
59  
60

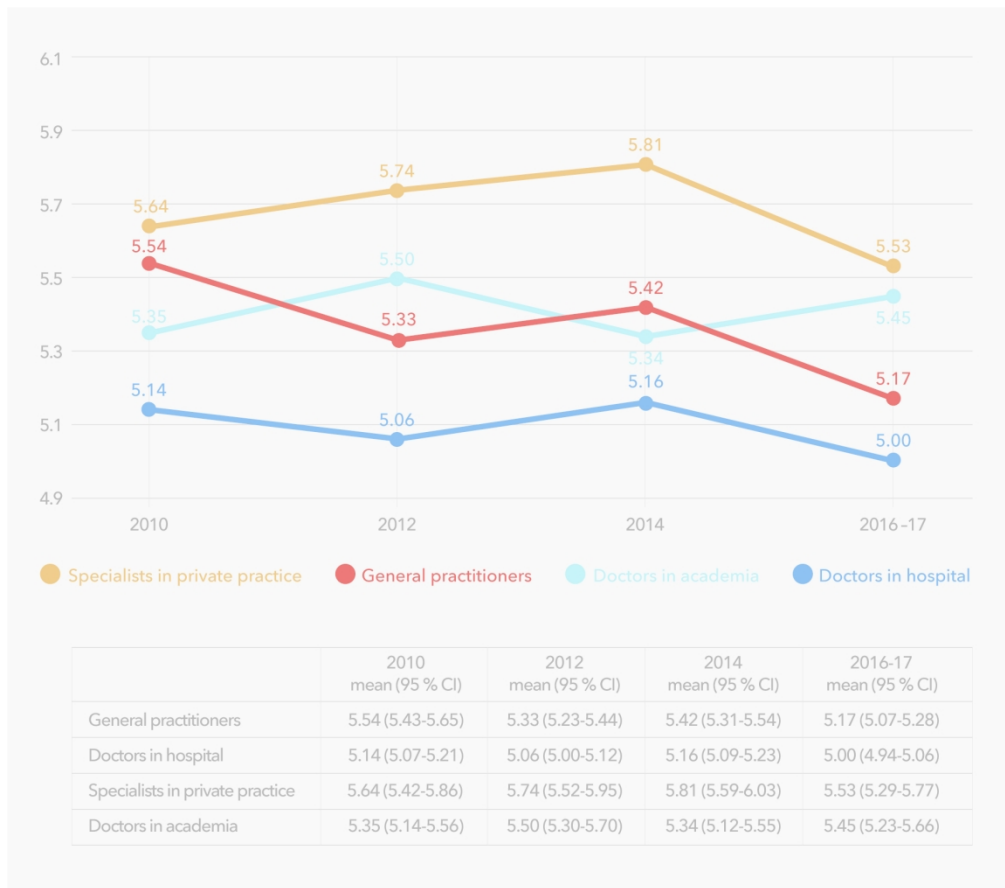

GLM estimated means of job satisfaction (scored from 1 to 7) controlled for age and gender among doctors in different job positions in 2010, 2012, 2014 and 2016-17



GLM estimated means of job satisfaction (scored from 1 to 7) controlled for age and gender among doctors in different job positions in 2010, 2012, 2014 and 2016-17 with paired t-tests (the longitudinal subsample)

**STROBE 2007 (v4) checklist of items to be included in reports of observational studies in epidemiology\***  
**Checklist for cohort, case-control, and cross-sectional studies (combined)**

**Manuscript ID bmjopen-2018-027891: Changes in job satisfaction among doctors in Norway from 2010 to 2017.A study based on repeated surveys**  
**Judith ROSTA, Olaf G. AASLAND, Magne NYLENNA**

| Section/Topic             | Item # | Recommendation                                                                                                                                                                                                                                                                                                                                                                                                                                                         | Reported on page # |
|---------------------------|--------|------------------------------------------------------------------------------------------------------------------------------------------------------------------------------------------------------------------------------------------------------------------------------------------------------------------------------------------------------------------------------------------------------------------------------------------------------------------------|--------------------|
| Title and abstract        | 1      | (a) Indicate the study’s design with a commonly used term in the title or the abstract                                                                                                                                                                                                                                                                                                                                                                                 | 1-2                |
|                           |        | (b) Provide in the abstract an informative and balanced summary of what was done and what was found                                                                                                                                                                                                                                                                                                                                                                    | 2                  |
| <b>Introduction</b>       |        |                                                                                                                                                                                                                                                                                                                                                                                                                                                                        |                    |
| Background/rationale      | 2      | Explain the scientific background and rationale for the investigation being reported                                                                                                                                                                                                                                                                                                                                                                                   | 4-5                |
| Objectives                | 3      | State specific objectives, including any pre-specified hypotheses                                                                                                                                                                                                                                                                                                                                                                                                      | 5                  |
| <b>Methods</b>            |        |                                                                                                                                                                                                                                                                                                                                                                                                                                                                        |                    |
| Study design              | 4      | Present key elements of study design early in the paper                                                                                                                                                                                                                                                                                                                                                                                                                | 6                  |
| Setting                   | 5      | Describe the setting, locations, and relevant dates, including periods of recruitment, exposure, follow-up, and data collection                                                                                                                                                                                                                                                                                                                                        | 6                  |
| Participants              | 6      | (a) <i>Cohort study</i> —Give the eligibility criteria, and the sources and methods of selection of participants. Describe methods of follow-up<br><i>Case-control study</i> —Give the eligibility criteria, and the sources and methods of case ascertainment and control selection. Give the rationale for the choice of cases and controls<br><i>Cross-sectional study</i> —Give the eligibility criteria, and the sources and methods of selection of participants | 6                  |
|                           |        | (b) <i>Cohort study</i> —For matched studies, give matching criteria and number of exposed and unexposed<br><i>Case-control study</i> —For matched studies, give matching criteria and the number of controls per case                                                                                                                                                                                                                                                 | N/A                |
| Variables                 | 7      | Clearly define all outcomes, exposures, predictors, potential confounders, and effect modifiers. Give diagnostic criteria, if applicable                                                                                                                                                                                                                                                                                                                               | 7-9                |
| Data sources/ measurement | 8*     | For each variable of interest, give sources of data and details of methods of assessment (measurement). Describe comparability of assessment methods if there is more than one group                                                                                                                                                                                                                                                                                   | 7-9                |
| Bias                      | 9      | Describe any efforts to address potential sources of bias                                                                                                                                                                                                                                                                                                                                                                                                              | 17                 |
| Study size                | 10     | Explain how the study size was arrived at                                                                                                                                                                                                                                                                                                                                                                                                                              | 6 and Table 1      |
| Quantitative variables    | 11     | Explain how quantitative variables were handled in the analyses. If applicable, describe which groupings were chosen and why                                                                                                                                                                                                                                                                                                                                           | 9                  |
| Statistical methods       | 12     | (a) Describe all statistical methods, including those used to control for confounding                                                                                                                                                                                                                                                                                                                                                                                  | 9                  |
|                           |        | (b) Describe any methods used to examine subgroups and interactions                                                                                                                                                                                                                                                                                                                                                                                                    | 9                  |
|                           |        | (c) Explain how missing data were addressed                                                                                                                                                                                                                                                                                                                                                                                                                            | 9                  |



|                          |     |                                                                                                                                                                                                                                                                                                           |                                      |
|--------------------------|-----|-----------------------------------------------------------------------------------------------------------------------------------------------------------------------------------------------------------------------------------------------------------------------------------------------------------|--------------------------------------|
|                          |     | (d) <i>Cohort study</i> —If applicable, explain how loss to follow-up was addressed<br><i>Case-control study</i> —If applicable, explain how matching of cases and controls was addressed<br><i>Cross-sectional study</i> —If applicable, describe analytical methods taking account of sampling strategy | N/A                                  |
|                          |     | (e) Describe any sensitivity analyses                                                                                                                                                                                                                                                                     | N/A                                  |
| <b>Results</b>           |     |                                                                                                                                                                                                                                                                                                           |                                      |
| Participants             | 13* | (a) Report numbers of individuals at each stage of study—eg numbers potentially eligible, examined for eligibility, confirmed eligible, included in the study, completing follow-up, and analysed                                                                                                         | 10 and Table 1                       |
|                          |     | (b) Give reasons for non-participation at each stage                                                                                                                                                                                                                                                      | 10 and Table 1                       |
|                          |     | (c) Consider use of a flow diagram                                                                                                                                                                                                                                                                        | N/A                                  |
| Descriptive data         | 14* | (a) Give characteristics of study participants (eg demographic, clinical, social) and information on exposures and potential confounders                                                                                                                                                                  | 10                                   |
|                          |     | (b) Indicate number of participants with missing data for each variable of interest                                                                                                                                                                                                                       | 10 and Table 1                       |
|                          |     | (c) <i>Cohort study</i> —Summarise follow-up time (eg, average and total amount)                                                                                                                                                                                                                          | N/A                                  |
| Outcome data             | 15* | <i>Cohort study</i> —Report numbers of outcome events or summary measures over time                                                                                                                                                                                                                       | N/A                                  |
|                          |     | <i>Case-control study</i> —Report numbers in each exposure category, or summary measures of exposure                                                                                                                                                                                                      | N/A                                  |
|                          |     | <i>Cross-sectional study</i> —Report numbers of outcome events or summary measures                                                                                                                                                                                                                        | 11                                   |
| Main results             | 16  | (a) Give unadjusted estimates and, if applicable, confounder-adjusted estimates and their precision (eg, 95% confidence interval). Make clear which confounders were adjusted for and why they were included                                                                                              | 11-12 and Figure 1, 2 and Table 2, 3 |
|                          |     | (b) Report category boundaries when continuous variables were categorized                                                                                                                                                                                                                                 | N/A                                  |
|                          |     | (c) If relevant, consider translating estimates of relative risk into absolute risk for a meaningful time period                                                                                                                                                                                          | N/A                                  |
| Other analyses           | 17  | Report other analyses done—eg analyses of subgroups and interactions, and sensitivity analyses                                                                                                                                                                                                            | 11-12 and Table 2, 3                 |
| <b>Discussion</b>        |     |                                                                                                                                                                                                                                                                                                           |                                      |
| Key results              | 18  | Summarise key results with reference to study objectives                                                                                                                                                                                                                                                  | 13                                   |
| Limitations              | 19  | Discuss limitations of the study, taking into account sources of potential bias or imprecision. Discuss both direction and magnitude of any potential bias                                                                                                                                                | 17                                   |
| Interpretation           | 20  | Give a cautious overall interpretation of results considering objectives, limitations, multiplicity of analyses, results from similar studies, and other relevant evidence                                                                                                                                | 15-17                                |
| Generalisability         | 21  | Discuss the generalisability (external validity) of the study results                                                                                                                                                                                                                                     | 13-15                                |
| <b>Other information</b> |     |                                                                                                                                                                                                                                                                                                           |                                      |
| Funding                  | 22  | Give the source of funding and the role of the funders for the present study and, if applicable, for the original study on which the present article is based                                                                                                                                             | N/A                                  |

\*Give information separately for cases and controls in case-control studies and, if applicable, for exposed and unexposed groups in cohort and cross-sectional studies.

**Note:** An Explanation and Elaboration article discusses each checklist item and gives methodological background and published examples of transparent reporting. The STROBE checklist is best used in conjunction with this article (freely available on the Web sites of PLoS Medicine at <http://www.plosmedicine.org/>, Annals of Internal Medicine at <http://www.annals.org/>, and Epidemiology at <http://www.epidem.com/>). Information on the STROBE Initiative is available at [www.strobe-statement.org](http://www.strobe-statement.org).

# BMJ Open

## Changes in job satisfaction among doctors in Norway from 2010 to 2017. A study based on repeated surveys

|                                 |                                                                                                                                                                                                                                                   |
|---------------------------------|---------------------------------------------------------------------------------------------------------------------------------------------------------------------------------------------------------------------------------------------------|
| Journal:                        | <i>BMJ Open</i>                                                                                                                                                                                                                                   |
| Manuscript ID                   | bmjopen-2018-027891.R2                                                                                                                                                                                                                            |
| Article Type:                   | Research                                                                                                                                                                                                                                          |
| Date Submitted by the Author:   | 07-Jul-2019                                                                                                                                                                                                                                       |
| Complete List of Authors:       | Rosta, Judith; Institute for Studies of the Medical Profession<br>Aasland, Olaf; Institute for Studies of the Medical Profession<br>Nylenna, Magne; The Norwegian Institute of Public Health; University of Oslo, Institute of Health and Society |
| <b>Primary Subject Heading</b>: | Health services research                                                                                                                                                                                                                          |
| Secondary Subject Heading:      | Health policy, Occupational and environmental medicine, Epidemiology                                                                                                                                                                              |
| Keywords:                       | job satisfaction, doctors, Norway, repeated surveys                                                                                                                                                                                               |
|                                 |                                                                                                                                                                                                                                                   |

SCHOLARONE™  
Manuscripts

1  
2  
3 1 Re-submission to BMJ Open

4  
5 2 (Manuscript ID bmjopen-2018-027891)

6  
7 3  
8  
9  
10 4 **Changes in job satisfaction among doctors**  
11  
12  
13 5 **in Norway from 2010 to 2017.**

14  
15  
16 6 **A study based on repeated surveys**

17  
18  
19 7  
20  
21 8 **Judith Rosta**, PhD, senior researcher (1)

22  
23 9 **Olaf G. Aasland**, MD, MHA, senior researcher (1)

24  
25 10 **Magne Nylenna**, MD, PhD, professor (2,3)

26  
27 11  
28  
29 12 **Affiliations:** (1) Institute for Studies of the Medical Profession, Oslo, Norway; (2) Institute of Health  
30  
31 13 and Society, University of Oslo, Norway; (3) The Norwegian Institute of Public Health, Oslo, Norway

32  
33 14  
34  
35 15 **Word count:** 4587

36  
37 16 **Number of tables:** 3

38  
39 17 **Number of figures:** 2

40  
41 18 **Keywords:** Job satisfaction, doctors, Norway, repeated surveys

42  
43 19  
44 20 **Corresponding author**

45 21 Name: Judith Rosta

46 22 Institute: Institute for Studies of the Medical Profession, NMA

47 23 Street: Akersgata 2

48 24 Postal code: 0107

49 25 City: Oslo

50 26 Country: Norway

51 27 Email: [judith.rosta@legeforeningen.no](mailto:judith.rosta@legeforeningen.no)

1  
2  
3 1 **ABSTRACT**

4  
5 2 **OBJECTIVE**

6  
7 3 To assess job satisfaction for different categories of Norwegian doctors from 2010 to 2016-17.

8  
9 4 **DESIGN**

10  
11 5 Cross sectional surveys in 2010, 2012, 2014 and 2016-17 of partly overlapping samples.

12  
13 6 **SETTING**

14  
15 7 Norway from 2010 to 2016-17.

16  
17 8 **PARTICIPANTS**

18  
19 9 Doctors working in different job positions (hospital doctors, GPs, private practice specialists, doctors  
20  
21 in academia). Response rates were 67% (1014/1520) in 2010, 71% (1279/1792) in 2012, 75%  
22  
23 (1158/1545) in 2014 and 73% (1604/2195) in 2016-17. The same 548 doctors responded at all four  
24  
25 points in time.  
26  
27

28  
29 13 **MAIN OUTCOME MEASURE**

30  
31 14 Job Satisfaction Scale (JSS), a 10-item widely used instrument, with scores ranging from 1 (low  
32  
33 satisfaction) to 7 (high satisfaction) for each item, and an unweighted mean total sum score.

34  
35 16 **ANALYSIS**

36  
37 17 GLM, controlling for gender and age, and paired t-tests.

38  
39 18 **RESULTS**

40  
41 19 For all doctors, the mean scores of JSS decreased significantly from 5.52 (95% confidence interval  
42  
43 5.42 to 5.61) in 2010 to 5.30 (5.22 to 5.38) in 2016-17. The decrease was significant for GPs (5.54,  
44  
45 5.43 to 5.65 vs. 5.17, 5.07 to 5.28) and hospital doctors (5.14, 5.07 to 5.21 vs. 5.00, 4.94 to 5.06).  
46  
47 22 Private practice specialists were most satisfied, followed by GPs and hospital doctors. The difference  
48  
49 23 between the GPs and the private practice specialists increased over time.

50  
51 24 **CONCLUSIONS**

52  
53 25 From 2010 to 2016-17 job satisfaction for Norwegian doctors decreased, but it was still at a relatively  
54  
55 high level. Several health care reforms and regulations over the last decade and changes in the  
56  
57 27 professional culture may explain some of the reduced satisfaction.

58  
59 28 **KEYWORDS:** Job satisfaction, doctors, Norway, repeated surveys

1  
2  
3 1 **Strengths and limitations of the study**  
4

5 2 The surveys had high response rates.  
6  
7 3

8  
9 4 The data allowed for generalisation to the whole doctor workforce in Norway.  
10  
11 5

12  
13 6 There were similarities in survey methods and measurements at all four points in time.  
14  
15 7

16  
17 8 The ten item version of the Warr-Cook-Wall scale for job satisfaction was specifically modified for  
18  
19 9 GPs in the UK, but it has been used extensively in doctor populations both in Norway and elsewhere.  
20  
21 10

22  
23  
24 11 Analyses were based on self-reported questionnaire data with the possibility of both over- and  
25  
26 12 underestimation.  
27  
28 13

29  
30 14  
31  
32  
33  
34  
35  
36  
37  
38  
39  
40  
41  
42  
43  
44  
45  
46  
47  
48  
49  
50  
51  
52  
53  
54  
55  
56  
57  
58  
59  
60

## 1 INTRODUCTION

2  
3 Job satisfaction is important both for individual employees and organisations. It is linked to  
4 employees' productivity,<sup>1</sup> absenteeism,<sup>2</sup> turnover,<sup>3</sup> physical and mental health and well-being.<sup>3-6</sup>

5  
6 For doctors, wellness is crucial to the delivery of good health care and has been identified as a missing  
7 quality indicator.<sup>7</sup> Satisfaction is a substantial element of professional wellness and has as such  
8 become a key performance indicator in quality systems.<sup>8</sup> While a high level of job satisfaction is  
9 associated with positive outcomes, doctors' job discontent may become a threat to the quality of  
10 patient care and safety, on an individual as well as on a system level.<sup>9-14</sup>

11  
12 Doctors' job satisfaction is related to work load, healthcare organization and management,  
13 professional autonomy, the ability to provide high quality health care, and financial systems including  
14 personal income.<sup>14-19</sup>

15  
16 Two important reforms were introduced in Norway at the beginning of the 21 century: "The Regular  
17 General Practitioners Scheme" in 2001 and "The Hospital Reform" in 2002. The Regular General  
18 Practitioners Scheme introduced a list-patient system whereby all inhabitants in Norway have their  
19 assigned general practitioner. This reform aimed at enhancing access to general practitioners and  
20 continuity in the patient-doctor relationship. The implementation of the list-patient system has  
21 modified the structure of GPs' remuneration into a combination of three sources: capitation based  
22 payment from the local government, fee-for-service payment from NAV (the National Insurance  
23 System) and out-of-pocket payments from patients. The Hospital Reform transferred the ownership of  
24 hospitals and specialist health services from the county to the state level, organised through central and  
25 local health enterprises.

26  
27 Previous studies showed that the satisfaction level among doctors in Norway was stable and high from  
28 1994 to 2002<sup>20</sup> and even increased from 2000 to 2006.<sup>21</sup> General practitioners and private practice

1  
2  
3 1 specialists were generally more satisfied than hospital doctors.<sup>21 22</sup> The above mentioned  
4  
5 2 comprehensive reforms did not have any detectable positive or negative impact on the job satisfaction  
6  
7 3 of neither hospital doctors nor GPs,<sup>21</sup> as opposed to an international negative trend.<sup>23-27</sup> The  
8  
9 4 satisfaction level of doctors in Norway was higher than in comparable countries like Germany,<sup>28 29</sup>  
10  
11 5 Iceland<sup>30</sup> and the US.<sup>19</sup>  
12  
13  
14 6

15  
16 7 Three new organizational reforms have also been introduced in Norwegian health care over the last  
17  
18 8 decade. "The Coordination Reform" from 2012 intended to improve the collaboration between  
19  
20 9 specialist (secondary) and municipal (primary) health care levels by placing more responsibility for  
21  
22 10 individual patients on the local community. This has resulted in an increased workload on the general  
23  
24 11 practitioners,<sup>31 32</sup> which so far has not been compensated by a corresponding strengthening in  
25  
26 12 resources and staffing.<sup>33</sup> "The Free Choice of Hospital Reform" in 2015 gave the users a free choice of  
27  
28 13 hospital,<sup>34</sup> and the white paper on "The Future Primary Care – Proximity and Comprehensiveness" in  
29  
30 14 2015 was implemented to improve user involvement, availability, prevention, proactivity and  
31  
32 15 collaboration between multidisciplinary teams.<sup>35</sup> Recent surveys on hospital doctors' and GP' working  
33  
34 16 conditions documented high workload and considerable growth in work demand.<sup>36 37</sup> The impact of the  
35  
36 17 latest reforms on doctors' job satisfaction has so far been insufficiently explored.  
37  
38  
39 18

40  
41 19 There are several instruments to measure job satisfaction, including single items and multi-item  
42  
43 20 scales.<sup>6 38 39</sup> A widely used instrument in health care settings is the ten item version<sup>40</sup> of the Warr-  
44  
45 21 Cook-Wall job satisfaction scale (JSS),<sup>6</sup> assessing both total job satisfaction and satisfaction with  
46  
47 22 different aspects of the job.<sup>19-21 26 28-30 40-42</sup> It also allows for good national and international  
48  
49 23 comparisons.  
50

51  
52 24  
53  
54 25 This paper reports the development of job satisfaction among Norwegian doctors from 2010 to 2016-  
55  
56 26 17 with special emphasis on general practitioners and a possible effect of the latest reforms.  
57  
58 27  
59  
60

## 1 MATERIALS AND METHODS

### 2 Design and participants

3 Since 1994 the Institute for Studies of the Medical Profession (LEFO, [www.legeforsk.org](http://www.legeforsk.org)) has  
4 regularly surveyed a representative panel of active Norwegian doctors biannually with postal  
5 questionnaires. The original panel was based on an invitation to 2,000 randomly selected active  
6 Norwegian doctors in 1993. The 1,272 doctors who agreed to participate were representative of the  
7 total doctor work force in terms of age, sex, specialty and place of work. Since then approximately 540  
8 doctors have left the panel due to retirement, death, or voluntary withdrawal. Therefore, the panel was  
9 supplemented with approximately 400 young doctors in 2000, 250 young doctors in 2008, 300 in 2012  
10 and 650 doctors in 2016-17, maintaining the representativity.<sup>43 44</sup> With this in and out pattern our  
11 cohort constitutes what may be called an unbalanced cohort.

12  
13 This article is based on data from 2010, 2012, 2014 (partly in 2015) and 2016 (partly in 2017).  
14

### 15 Inclusion and exclusion criteria

16 Since interns were only identified in data from 2016-17, this category is excluded in this paper.  
17

### 18 Ethical approval

19 According to the Regional Committee for Medical Research Ethics, the study based  
20 on "Norwegian Physician Survey - A bi-annual prospective questionnaire survey to a representative  
21 sample of Norwegian physicians" is exempt from review in Norway, cf. §§ 4 of The Act. The project  
22 can be implemented without the approval by the Regional Committee for Medical Research Ethics  
23 (IRB 0000 1870). All invitees received a letter with a description of the "Norwegian Physician  
24 Survey" aim. It was also explained that the participation is voluntary and the data would be handled  
25 confidentially. All participants signed informed written consent before the start of the survey.  
26  
27



## 1 **Dependent variables**

2  
3  
4  
5 2 *Total job satisfaction* and *satisfaction with different aspects of the job* were measured with the ten item  
6  
7 version<sup>40</sup> of the "Job Satisfaction Scale" by Warr, Cook and Wall.<sup>6</sup>

8  
9  
10  
11 5 The original scale included one item assessing the overall satisfaction and fifteen items assessing two  
12  
13 6 factors related to job satisfaction, the intrinsic factor (seven items on attitudes towards personal  
14  
15 7 achievement and task success: freedom to choose your own method of working, recognition you get  
16  
17 8 for good work, the amount of responsibility you are given, your opportunity to use your abilities, your  
18  
19 9 chance of promotion, the attention paid to suggestions you make, the amount of variety in your job)  
20  
21 10 and extrinsic factor (eight items on attitudes on working conditions: physical working conditions, your  
22  
23 11 fellow workers, your immediate boss, your rate of pay, industrial relations between management and  
24  
25 12 workers in your firm, the way your firm is managed, your hours of work, your job security). The total  
26  
27 13 job satisfaction was calculated as the sum of all separate items. The scale was tested for validity and  
28  
29 14 reliability in blue-collar male workers employed full-time in a manufacturing industry in the United  
30  
31 15 Kingdom.<sup>6</sup>

32  
33  
34  
35  
36  
37 17 The ten item form of the original scale was devised by Cooper-Rout-Faragher in 1989 to study job  
38  
39 18 satisfaction, mental health and stress among general practitioners in England. Five items were  
40  
41 19 removed from the original scale that were not relevant for the general practitioners population: "your  
42  
43 20 immediate boss", "industrial relations between management and workers in your firm", "your chance  
44  
45 21 of promotion", "the way your firm is managed" and "your job security". The scale was not tested for  
46  
47 22 validity and reliability by Cooper, Rout and Faragher.<sup>40</sup> A validation study of this scale was done in a  
48  
49 23 cohort of Australian clinical medical workforce by Hills, Joyce and Humphries in 2012, where the  
50  
51 24 original seven point Likert scale was reduced to five point Likert scale from 0 (very dissatisfied) to 4  
52  
53 25 (very satisfied). Factor analytic and internal reliability tests did not support differentiating intrinsic and  
54  
55 26 extrinsic factors. They supported the use of the ten item instrument as a single-factor scale and the use  
56  
57 27 of a composite job satisfaction score.<sup>45</sup>

58  
59  
60 28

1 The ten item version<sup>40</sup> of the original Warr-Cook-Wall questionnaire with seven point Likert scale<sup>6</sup>  
2 was used extensively in doctors population in Norway and elsewhere.<sup>19-22 26 28-30 41 42</sup> We applied this  
3 instrument in our study to allow comparisons across countries and over time. The ten items were:

4 How satisfied are you with:

- 5 (1) The amount of responsibility you are given
- 6 (2) Variation of work
- 7 (3) Your colleagues and fellow workers
- 8 (4) Your physical work conditions
- 9 (5) Your opportunities to use your skills
- 10 (6) Your overall job situation
- 11 (7) The freedom to choose your own methods of working
- 12 (8) The recognition you get for good achievements
- 13 (9) Your rate of pay
- 14 (10) Your work hours

15 We asked the doctors to score each of the ten items on a seven point Likert scale from 1 (very  
16 dissatisfied) to 7 (very satisfied). An unweighted mean sum score was calculated, as well as analyses  
17 of single items.

18

### 19 **Independent variables**

20 There are several possible job positions for doctors in Norway. For the purpose of this study, they are  
21 collapsed into the following seven categories:

- 22 (a) Doctors in hospital: doctors in management positions (medical superintendent, head of department,  
23 chief senior consultant, head of unit, senior consultant, head of section), senior hospital consultants  
24 and specialty registrars
- 25 (b) General practitioners
- 26 (c) Specialists working in private practice
- 27 (d) Doctors in academia: professor, associate professor, research fellow, and researcher

1  
2  
3 1 (e) Community medical officers: district medical officer, senior district medical officer, nursing home  
4  
5 2 medical officer, visiting medical officer, doctor at infant welfare clinic, community general  
6  
7 3 practitioner  
8

9 4 (f) Doctors in administrative positions: county medical officer, medical advisor, chief medical officer

10  
11 5 (g) Other job categories  
12

13 6 Other independent variables were *gender* and *age*.  
14  
15  
16  
17

## 18 8 **Analyses**

19  
20 9 The distribution of JSS was close to normal (Kolmogorov-Smirnov test 0.56,  $p < 0.001$ ) with a slightly  
21  
22 10 negative skewness (-0.62). Thus the use of parametric tests was unproblematic. General Linear  
23  
24 11 modelling (GLM) controlled for *gender* and *age* was used to estimate the means of job satisfaction at  
25  
26 12 the four points in time: 2010, 2012, 2014, and 2016-17. Statistically significant differences were  
27  
28 13 assumed when the 95% confidence intervals were not overlapping.  
29

30  
31 14  
32 15 Paired t-tests were used to show individual differences between two points in time.  
33  
34  
35  
36

37 17 Three different samples were analysed. The first consisted of all respondents at all times, the  
38  
39 18 *unbalanced cohort*. Here respondents with missing data on *gender* or *age* or all JSS items were  
40  
41 19 excluded. The second sample comprised doctors with defined job positions in one of four categories:  
42  
43 20 GPs, specialists in private practice, hospital doctors, and doctors in academia in minimum one survey.  
44  
45 21 The third, *longitudinal* sample were the doctors who responded at all four points in time. A subsample  
46  
47 22 here were the doctors who did not change job position during the observational period.  
48  
49  
50

51 24 Predictive Analytics Software Statistics 25 was used for the analyses.  
52  
53  
54  
55  
56  
57  
58  
59  
60

## 1 Patient and public involvement

2 No patients were involved in setting the research questions or the outcome measures, nor were they  
3 involved in the design and implementation of the study. There are no plans to involve patients in  
4 dissemination.

## 7 RESULTS

### 8 Respondents

9 Table 1 shows the sample, number of respondents, response rates and the makeup of job positions for  
10 which we have data on JSS, gender and age: 948 in 2010, 1164 in 2012, 1057 in 2014 and 1290 in  
11 2016-17. The majority of respondents worked in hospitals.

13 Table 1

15 The proportion of females increased from 37.4% (95 % CI 34.3 to 40.5) in 2010, to 43.4% (40.6 to  
16 46.3) in 2012, was 42.5% (39.5 to 45.5) in 2014 and increased further to 52.9% (50.3 to 55.5) in 2016-  
17 17. The mean age was 50.7 (95% CI 49.9 to 51.6) years in 2010, 49.7 (48.9 to 50.4) years in 2012,  
18 50.5 (49.7 to 51.3) years in 2014 and 47.7 (46.9 to 48.4) years in 2016-17.

20 The representativity of the data for 2010, 2012 and 2014 is described elsewhere.<sup>44</sup> Data for 2016-17  
21 are comparable with the Norwegian doctor workforce in 2016-17 regarding age, but with a slightly  
22 higher percentage of females, and doctors in academia (data not shown). The distribution of doctors in  
23 different job positions are comparable over the study period (Table 1).

25 548 doctors responded at all four time points, 202 (37%) females. Mean age in 2010 was 48.1 years.  
26 64.8% (355/548) were stable in their jobs over the period: 233 hospital doctors, 94 GPs, 22 private  
27 practice specialists and 6 doctors in academia. Due to the low number of doctors in academia, this  
28 group is excluded in some of the analyses.

## 1 2 3 1 4 5 2 **Changes in job satisfaction**

### 6 7 3 *All doctors*

8  
9 4 The estimated mean of job satisfaction, controlled for gender, age and job position for all respondents  
10  
11 5 in 2016-17, was 5.30, (95% CI 5.22 to 5.38), which is significantly lower than in 2010 (5.52, 5.42 to  
12  
13 6 5.61), and non-significantly different from 2012 (5.45, 5.37 to 5.54) and 2014 (5.44, 5.35 to 5.53).  
14  
15 7

### 16 17 18 8 *Doctors in different job positions*

19  
20 9 Over the whole period, the mean score of job satisfaction decreased for GPs and for hospital doctors.  
21  
22 10 Private practice specialists were the most satisfied, while hospital doctors were least satisfied. No  
23  
24 11 differences were found between GPs and doctors in academia. Job satisfaction generally increased  
25  
26 12 from 2012 to 2014 and decreased from 2014 to 2016-17 for GPs, private practice specialists and  
27  
28 13 hospital doctors. In 2016-17, GPs reported significantly higher satisfaction than hospital doctors, and  
29  
30 14 significantly lower satisfaction than private practice specialists.  
31  
32 15

33  
34  
35 16 Figure 1 with table  
36  
37 17

38  
39 18 From 2010 to 2016-17 there was a non-significant change in JSS for other job positions such as  
40  
41 19 community medical officers (5.59, 95% CI 5.26 to 5.91 vs. 5.33, 5.10 to 5.56), doctors in  
42  
43 20 administration (5.75, 5.38 to 6.12 vs. 5.39, 5.08 to 5.71) and doctors in other positions (5.61, 5.32 to  
44  
45 21 5.89 vs. 5.23, 4.99 to 5.46).  
46  
47 22

### 48 49 23 *Effect of age, gender and specialty on estimated means of JSS*

50  
51 24 There were no gender differences. JSS increased with increasing age. Among hospital doctors, JSS did  
52  
53 25 not vary significantly over time across medical specialties (data not shown).  
54  
55 26  
56 27  
57  
58  
59  
60

## 1 **Changes in JSS in the longitudinal sample**

### 2 *All doctors*

3 Using paired sample t-tests, JSS scores were found to change non-significantly from 2010 to 2012  
4 (5.30 vs. 5.34;  $t=1.43$ ;  $p=0.152$ ), to increase significantly from 2012 to 2014 (5.34 vs. 5.41;  $t=2.19$ ;  
5  $p=0.029$ ) and then to decrease significantly from 2014 to 2016-17 (5.41 vs. 5.34;  $t=-2.03$ ;  $p=0.043$ ).  
6

### 7 *Hospital doctors, GPs and private practice specialists*

8 From 2010 to 2016-17 in the longitudinal subsample, the JSS scores for GPs decreased steadily. A  
9 significant increase in JSS scores was found for specialists in private practice from 2010 to 2012, and  
10 for hospital doctors from 2012 to 2014. For all three job positions, there was a non-significant decline  
11 in JSS from 2014 to 2016-17. At any point in time, private practice specialists were the most satisfied.  
12 GPs were more satisfied than hospital doctors, but the difference between these groups decreased.  
13

14 Figure 2

## 16 **Changes on the item level**

17 For GPs and doctors in hospital, the item scores on "freedom to choose methods", "recognition for  
18 good work", "rate of pay" and "work hours" decreased significantly from 2010 to 2016-17. Also, GPs  
19 reported significantly lower scores for "amount of responsibility" and "overall job satisfaction ". No  
20 significant changes on the item level were found for private practice specialists and for doctors in  
21 academia.  
22

23 Table 2

24  
25 The same pattern was found in the longitudinal subsample for GPs and hospital doctors, although not  
26 statistically significant.  
27

28 Table 3

## 1 DISCUSSION

### 2 Main findings

3 From 2010 to 2016-17, job satisfaction for all doctors decreased significantly. The decrease was  
4 statistically significant for GPs and for hospital doctors. Private practice specialists were most  
5 satisfied, followed by GPs and hospital doctors. The difference between the GPs and the private  
6 practice specialist increased over time. Of the ten JSS items, scores on "working hours", "payment",  
7 "recognition for good work" and "freedom to choose methods of work" declined significantly, both  
8 among GPs and hospital doctors, while no significant changes were found for specialists in private  
9 practice and doctors in academia (Table 2, Figure 1). In the longitudinal subsample, there was a non-  
10 significant decline in JSS for GPs, hospital doctors and private practice specialists from 2014 to 2016-  
11 17 (Figure 2).

### 13 Comparison with other studies

14 Differences in methodology limit direct comparisons with other studies. However, it is possible to  
15 point out some international trends in job satisfaction; older doctors report higher job satisfaction, and  
16 there are no gender differences.<sup>20 22 29 41</sup> Age changes in satisfaction are related to the lowered  
17 expectations over time, higher remuneration, higher perceived autonomy and more experience.<sup>21 46 47</sup>  
18  
19 In Norway, job satisfaction was stable and high from 1994 to 2002,<sup>20</sup> increased from 2000 to 2006,<sup>21</sup>  
20 and decreased from 2010 to 2016-17. However, it was still at a relatively high level in 2016-17, higher  
21 than in 2000, 2002, 2004 and lower than in 2006.<sup>20</sup> Longitudinal studies on doctors' job satisfaction  
22 are few and show a mixed pattern. A study on doctors' intention to work in the UK suggested a  
23 decrease in their satisfaction. The fraction of UK-trained doctors who would "probably not" or  
24 "definitely not" practice medicine in the UK increased from 8% in 1996-2011 to 15% in 2015.<sup>23</sup>  
25 Decreasing professional satisfaction was also described among doctors in the US.<sup>24</sup> On the other hand,  
26 increased satisfaction with work has been reported from doctors in the Netherlands from 2000 to  
27 2009<sup>48</sup> and from six graduation cohorts from 1996 to 2012 in the UK.<sup>49</sup> High levels of job satisfaction

1  
2  
3 1 were documented from emergency medicine residents in the US,<sup>50</sup> family physicians in Canada,<sup>51</sup>  
4 primary care physicians in Germany,<sup>52</sup> and doctors in Australia.<sup>53</sup>  
5  
6  
7  
8

9 4 Norwegian studies showed statistically significant higher job satisfaction for GPs than for hospital  
10 doctors from 2000 to 2006 and in 2008, and no significant differences between GPs and private  
11 practice specialist in 2008.<sup>21 22</sup> In our study, job satisfaction decreased significantly for GPs and  
12 hospital doctors, but GPs continued with higher scores than their hospital colleagues. GPs and private  
13 practice specialists had similar levels of satisfaction in 2010, while the scores were significantly higher  
14 for private practice specialist in 2012, 2014 and 2016-17 (Figure 1 with table).  
15  
16  
17  
18  
19  
20  
21  
22  
23

24 11 Decline in GP job satisfaction seems to be the rule all over the world. A Danish study showed that the  
25 proportion of GPs reporting dissatisfaction with work increased from 6% in 2012 to 22% in 2016. A  
26 significant increase in dissatisfaction was found for "working hours", "rate of pay", "freedom to  
27 choose methods" and "recognition for good work".<sup>26</sup> The National GP Worklife Survey in the UK  
28 documented that satisfaction with "colleagues and fellow workers" improved, while the other nine  
29 aspects of job declined from 2010 to 2017. The largest decreases were "working hours", "rate of pay"  
30 and "amount of responsibility".<sup>25</sup> The MABEL survey among doctors in Australia also showed a  
31 decline from 2013 to 2015 in GP job satisfaction.<sup>27</sup>  
32  
33  
34  
35  
36  
37  
38  
39  
40  
41  
42

43 20 According to a recent systematic review on satisfaction of doctors working in hospitals within the  
44 European Union based on studies from 2000 to 2017, hospital doctors had a moderate job satisfaction;  
45 4.81 on a scale from 1 to 7.<sup>54</sup> In our sample, hospital doctors reported higher levels of satisfaction:  
46 5.14 in 2010 and 5.00 in 2016-17.  
47  
48  
49  
50  
51  
52

53 25 In the Norwegian "Working environment and living conditions survey" from 2010 to 2016, there were  
54 no changes in JSS as measured by a five point Likert scale from very dissatisfied to very satisfied.  
55 About 90% of the employees reported that they are "quite" or "very satisfied" with their job. In data  
56 from 2016, top managers (97%), farmers/fisherman (95%) or physiotherapists (95%) reported a higher  
57  
58  
59  
60



1  
2  
3 1 level and nurses (89%), policemen (88%) or customer service occupations (82%) a lower level of  
4  
5 2 satisfaction than the doctors (90%). JSS among employees did not differ between gender and it did  
6  
7 3 increase with age.<sup>55</sup>  
8  
9 4

## 11 5 **Explanation of results**

13 6 Health care organisations and financial systems are constantly subject to change in most countries.  
14  
15 7 Studies document that changes in the healthcare organisation may influence doctors' work-life and  
16  
17 8 professional satisfaction.<sup>14 56</sup>  
18  
19 9

22 10 As already mentioned, three major health care reforms have been implemented over the last decade in  
23  
24 11 Norway: "The Coordination Reform" in 2012,<sup>32</sup> the "The Free Choice of Hospital Reform" in 2015<sup>34</sup>  
25  
26 12 and the white paper on "The Future Primary Care – Proximity and Comprehensiveness" in 2015.<sup>35</sup>  
27  
28 13 These reforms are challenging for the doctors, and may explain some of the reduction in satisfaction.  
29  
30 14 Studies showed that high professional autonomy yields better quality of health care and more doctor  
31  
32 15 satisfaction.<sup>18 57</sup> More time spent on direct patient care and less time spent on administrative tasks, and  
33  
34 16 optimal economic conditions in general are also important positive contributors to job satisfaction.<sup>28 58</sup>  
35  
36 17 <sup>59</sup> A study based on data from 1994 to 2014 showed that the total weekly working hours remained  
37  
38 18 unchanged for most doctors in Norway, while time spent on direct patient care decreased, particularly  
39  
40 19 for hospital doctors.<sup>44</sup> Another study with data from 2018 documented long working weeks with a  
41  
42 20 wide variety of tasks among GPs.<sup>60</sup> 70% of doctors experienced stress in association with perpetual  
43  
44 21 reorganisations of the national health care system, particularly hospital doctors.<sup>56</sup> A recent survey on  
45  
46 22 hospital doctors' working conditions documented that hospital doctors scored high on items related to  
47  
48 23 engagement at work, assessment of work as meaningful and cooperation with colleagues, but lower on  
49  
50 24 items related to workload and professional autonomy (including openness, participation in decision  
51  
52 25 making, dialogue with the hospital management).<sup>36</sup> In another recent survey on GPs' working  
53  
54 26 conditions,<sup>37</sup> GPs reported that they have a meaningful job with various interesting tasks. However,  
55  
56 27 they also reported considerable growth both in work demand and in the cost of running their own  
57  
58 28 medical office during the last decade. The high work demand was related to increased transfer of tasks  
59  
60

1  
2  
3 1 that were previously conducted by outpatient clinics or hospitals, for example follow-up care of  
4  
5 2 pregnant women or patients with chronic diseases like cancer, rheumatic diseases, endocrinological  
6  
7 3 disease, substance abuse or some mental health disorders. In addition, there were increases in  
8  
9 4 consultations, laboratory services for appointment specialists, tasks related to preventive treatment and  
10  
11 5 documentation as well as certification requirements.<sup>37 61</sup>  
12  
13  
14 6

15  
16 7 These findings fit well with our data where several aspects of satisfaction declined significantly. For  
17  
18 8 GPs, the largest decrease was in "amount of responsibility given" followed by "work hours",  
19  
20 9 "recognition for good clinical work", "rate of pay", "overall job satisfaction", and "freedom to choose  
21  
22 10 methods of work". For hospital doctors, the decrease was largest in "freedom to choose methods of  
23  
24 11 work" followed by "rate of pay", "recognition for good clinical work" and "work hours". The high job  
25  
26 12 satisfaction of specialists in private practice probably reflects both professional and time-based  
27  
28 13 autonomy and good economic conditions.  
29  
30  
31 14

32  
33 15 In the longitudinal subsample (the doctors who responded at all four points in time and did not change  
34  
35 16 job position), there were no significant changes neither on the item level nor on estimated job  
36  
37 17 satisfaction from 2010 to 2016-17 (Table 3). A common tendency for GPs, hospital doctors and  
38  
39 18 private practice specialist was a non-significant decrease in job satisfaction from 2014 to 2016-17  
40  
41 19 (Figure 2). A possible reason for this stability in job satisfaction may be a combination of the adaption  
42  
43 20 of health care regulations over time and the selection of doctors. The most satisfied doctors are more  
44  
45 21 likely to remain in their current job position.  
46  
47  
48 22

49  
50 23 Changes in professional culture may also explain some of the reduced satisfaction. In a study among  
51  
52 24 hospital doctors in Norway, many senior consultants talked about being a doctor as a major part of  
53  
54 25 their identity and lifestyle, while the specialty registrars were more likely to regard their work as a  
55  
56 26 job.<sup>62</sup> In another study, most doctors were satisfied as doctors, but felt it challenging to combine the  
57  
58 27 job with leisure activities and family life. Some senior consultants were of the opinion that specialty  
59  
60

1  
2  
3 1 registrars were less willing to prioritize professional life and more concerned with their responsibilities  
4  
5 2 outside of work.<sup>63</sup>  
6

7  
8  
9 4 The slightly increasing trend in job satisfaction among all Norwegian doctors described from 2000 to  
10  
11 5 2006<sup>21</sup> did not continue from 2010 to 2016-17. However, the job satisfaction level was still above 5 on  
12  
13 6 a 1 to 7 scale. In surveys from 2018, GPs and hospital doctors described their work as meaningful in  
14  
15 7 spite of considerable work overload.<sup>36 37</sup> This suggests that job satisfaction is also based on internal  
16  
17 8 values. To be in demand and to treat patients were also fundamental elements of doctor satisfaction.<sup>64</sup>  
18  
19  
20  
21

## 22 10 **Strengths and limitations**

23  
24 11 The main strength of this study is that it allows for generalisation to the whole population of doctors in  
25  
26 12 Norway. Similarities in survey methods and repeated measures over time is another advantage.  
27  
28 13 Furthermore, the response rates were fairly good, ranging from 67% and 75%, which are higher than  
29  
30 14 for other surveys of the medical profession, but do not rule out the possibility of non-response bias.<sup>44</sup> It  
31  
32 15 is possible that the doctors with a particularly heavy work burden and therefore a probable lower job  
33  
34 16 satisfaction to a lesser degree than others responded to the questionnaire, leading to an overestimation  
35  
36 17 of satisfaction level. On the other hand, doctors who are dissatisfied with their working conditions  
37  
38 18 might to a larger degree want to express their opinion, which could lead to lower satisfaction scores. A  
39  
40 19 study based on two cross-sectional surveys among English GPs from 2004 and 2005 supported an  
41  
42 20 association between response and satisfaction, respectively less satisfied GPs were more likely to  
43  
44 21 response.<sup>65</sup> However, our follow-up of the unbalanced cohort showed changes in the partly  
45  
46 22 overlapping samples of doctors over time, which give us valid data of changes in satisfaction. When it  
47  
48 23 comes to measuring subjective satisfaction, there is in general no alternative to survey individuals in a  
49  
50 24 random sample.<sup>66</sup> We do not know whether there is a tendency in our sample towards over- or  
51  
52 25 underestimation of the satisfaction levels with various components of working conditions, or whether  
53  
54 26 there are job-category or medical-discipline-specific differences in the self-reporting. Again, an  
55  
56 27 unbalanced cohort design with follow-up of the partly overlapping sample of doctors, gives us robust  
57  
58 28 data of changes in satisfaction. Another concern is that there is no gold standard of measuring doctors`  
59  
60

1 job satisfaction with a global, check-list based measure.<sup>39</sup> The ten item Warr-Cook-Wall scale for job  
2 satisfaction was specifically designed for GPs in solo practice in the UK,<sup>6,40</sup> but it has been used  
3 extensively to describe total job satisfaction and satisfaction of different level of work in doctor  
4 populations both in Norway and elsewhere.<sup>19-22 28-30 42</sup> The validation of this ten item job satisfaction  
5 scale in a cohort of Australian medical practitioners provided validity evidence for a single-factor  
6 solution and for a use of a composite job satisfaction score. However, it was suggested to include other  
7 job-specific items in the scale, especially for doctors having employee status or working in  
8 organisational settings.<sup>45</sup> Because job satisfaction varies with personality,<sup>67</sup> well-being,<sup>7,8</sup> mental and  
9 physical health status,<sup>3-5 40</sup> it is also important to include these co-variates in future analyses.

## 11 **Conclusion**

12 Job satisfaction for Norwegian doctors remained relatively high, but with a downward trend over the  
13 last eight years, where the decrease was statistically significant for GPs and hospital doctors. Private  
14 practice specialists were most satisfied, followed by GPs and hospital doctors. The difference between  
15 the GPs and the private practice specialists increased over time. While no significant changes were  
16 found in the ten job satisfaction scale items for private practice specialists and doctors in academia,  
17 satisfaction with "working hours", "payment", "recognition for good work" and "freedom to choose  
18 methods of work" declined significantly both among GPs and hospital doctors. Several health care  
19 reforms and regulations over the last decade and changes in the professional culture may explain some  
20 of the reduced satisfaction.

## 22 **Future research and policy implications**

23 Variations in job satisfaction across job positions call for more separate analyses in the future. The  
24 importance of a good professional climate is emphasized in both Norwegian and European working  
25 conditions legislature.<sup>68 69</sup> High job satisfaction among doctors is important. It has been found to relate  
26 positively to doctors well-being and quality of health care.<sup>9-14</sup> In addition, job satisfaction is an  
27 important factor for career decisions like staying in or leaving a current job position.<sup>3 70</sup> Low  
28 recruitment to primary care is a concurrent issue in media,<sup>71</sup> health administration<sup>72</sup> and research,<sup>33 73</sup>

1  
2  
3  
4  
5  
6  
7  
8  
9  
10  
11  
12  
13  
14  
15  
16  
17  
18  
19  
20  
21  
22  
23  
24  
25  
26  
27  
28  
29  
30  
31  
32  
33  
34  
35  
36  
37  
38  
39  
40  
41  
42  
43  
44  
45  
46  
47  
48  
49  
50  
51  
52  
53  
54  
55  
56  
57  
58  
59  
60

- 1 therefore better job satisfaction is important. This could be achieved through regulation of working
- 2 hours, improvement of recognition for medical work regarding payment and feedback for good work.

For peer review only

1  
2  
3 1 **Declarations**  
4  
5 2

6  
7 3 **Acknowledgements** The authors wish to thank all doctors who have supported this study by  
8  
9 4 participating in the survey.  
10  
11 5

12  
13 6 **Contributors** JR, OGA and MN designed the study. JR undertook the literature review, did the  
14  
15 7 statistical analysis and wrote the first draft. OGA and MN made critical revisions. All authors had full  
16  
17 8 access to all of the data (including statistical reports and tables) and are jointly responsible for the  
18  
19 9 integrity of the data and the accuracy of the data analysis.  
20  
21 10

22  
23  
24 11 **Funding** This research received no specific grant from any funding agency in the public,  
25  
26 12 commercial, or not-for-profit sectors.  
27  
28 13

29  
30 14 **Competing interest** None declared.  
31  
32 15

33  
34 16 **Ethics approval** According to the Regional Committee for Medical Research Ethics, the study based  
35  
36 17 on “Norwegian Physician Survey - A bi-annual prospective questionnaire survey to a representative  
37  
38 18 sample of Norwegian physicians” is exempt from review in Norway, cf. §§ 4 of The Act. The project  
39  
40 19 can be implemented without the approval by the Regional Committee for Medical Research Ethics  
41  
42 20 (IRB 0000 1870). Additionally, approval for data protection of the bi-annual prospective survey  
43  
44 21 among Norwegian doctors was obtained from the Norwegian Social Science Data Service (Reference  
45  
46 22 19521).  
47  
48 23

49  
50  
51 24 **Data sharing statement** The authors may be able to provide aggregated data on which the analysis is  
52  
53 25 based, on request. No additional data available.  
54  
55 26

56  
57  
58 27 **Patient consent** N/A  
59  
60 28

1  
2  
3 1 **STROBE Statement:** The authors confirm that they have followed the list of the STROBE  
4  
5 2 Statement (BMJ 2007;335:806-808).  
6

7 3  
8  
9 4 **Transparency declaration:** The lead author (Judith Rosta) affirms that the manuscript is an honest,  
10  
11 5 accurate, and transparent account of the study being reported; that no important aspects of the study  
12  
13 6 have been omitted; and that any discrepancies from the study as planned (and, if relevant, registered)  
14  
15 7 have been explained.  
16  
17 8

18  
19  
20  
21  
22  
23  
24  
25  
26  
27  
28  
29  
30  
31  
32  
33  
34  
35  
36  
37  
38  
39  
40  
41  
42  
43  
44  
45  
46  
47  
48  
49  
50  
51  
52  
53  
54  
55  
56  
57  
58  
59  
60

For peer review only

1  
2  
3 **1 Figure legends**  
4

5  
6 2

7  
8 3 Figure 1 GLM estimated means of job satisfaction (scored from 1 to 7) controlled for  
9  
10 4 age and gender among doctors in different job positions in 2010, 2012, 2014  
11  
12 5 and 2016-17 (the unbalanced cohort)  
13  
14 6

15  
16  
17 7 Figure 2 GLM estimated means of job satisfaction (scored from 1 to 7) controlled for  
18  
19 8 age and gender among doctors in different job positions in 2010, 2012, 2014  
20  
21 9 and 2016-17 with paired t-tests (the longitudinal subsample)  
22  
23  
24  
25  
26  
27  
28  
29  
30  
31  
32  
33  
34  
35  
36  
37  
38  
39  
40  
41  
42  
43  
44  
45  
46  
47  
48  
49  
50  
51  
52  
53  
54  
55  
56  
57  
58  
59  
60



**Table 1** Sample, number of respondents, response rates and the makeup of job categories for respondents where we have data on job satisfaction, gender and age

|         | Sample<br>(n) | Respondents <sup>(a)</sup><br>(n) | Response<br>rate<br>(%) | Job categories (n / %) |                        |                          |                                       |                        |                                  |                                          |                         |
|---------|---------------|-----------------------------------|-------------------------|------------------------|------------------------|--------------------------|---------------------------------------|------------------------|----------------------------------|------------------------------------------|-------------------------|
|         |               |                                   |                         | All <sup>(b)</sup>     | Doctors in<br>hospital | General<br>practitioners | Specialists<br>in private<br>practice | Doctors in<br>academia | Community<br>medical<br>officers | Doctors in<br>administrative<br>position | Other job<br>categories |
| 2010    | 1 520         | 1 014                             | 66.7                    | 948                    | 536 (56.4)             | 219 (23.1)               | 57 (6.0)                              | 61 (6.4)               | 24 (2.5)                         | 19 (2.0)                                 | 32 (3.4)                |
| 2012    | 1 792         | 1 279                             | 71.4                    | 1 164                  | 680 (58.4)             | 257 (22.1)               | 60 (5.2)                              | 67 (5.8)               | 38 (3.3)                         | 30 (2.6)                                 | 32 (2.8)                |
| 2014    | 1 545         | 1 158                             | 75.0                    | 1 057                  | 618 (58.5)             | 223 (21.1)               | 60 (5.8)                              | 60 (5.7)               | 38 (3.6)                         | 28 (2.7)                                 | 30 (2.8)                |
| 2016-17 | 2 195         | 1 604                             | 73.1                    | 1 290                  | 772 (59.8)             | 263 (20.4)               | 52 (4.0)                              | 64 (5.0)               | 55 (4.3)                         | 30 (2.3)                                 | 54 (4.2)                |

(a) Number of respondents with no data on job satisfaction or gender or age or job position were 66 in 2010, 115 in 2012, 101 in 2014 and 146 in 2016-17.

(b) Since interns were only identified in data 2016-17 (n=168), this category is excluded in this paper.

**Table 2 GLM on estimated means, controlled for gender and age, of the 10 job satisfaction scale items (each scored from 1 to 7) among doctors in different type of work in 2010 and 2016-17. Statistically significant differences (95% CI does not overlap) are in bold**

|                                  | General practitioners   |                         | Doctors in hospital     |                         | Specialists in private practice |                   | Doctors in academia |                   |
|----------------------------------|-------------------------|-------------------------|-------------------------|-------------------------|---------------------------------|-------------------|---------------------|-------------------|
|                                  | means (95 % CI)         |                         | means (95 % CI)         |                         | means (95 % CI)                 |                   | means (95 % CI)     |                   |
| Satisfied with ....              | 2010<br>(n=219)         | 2016-17<br>(n=263)      | 2010<br>(n=536)         | 2016-17<br>(n=772)      | 2010<br>(n=57)                  | 2016-17<br>(n=52) | 2010<br>(n=61)      | 2016-17<br>(n=64) |
| Amount of responsibility given   | <b>5.36 (5.19-5.53)</b> | <b>4.73 (4.57-4.90)</b> | 5.28 (5.17-5.38)        | 5.19 (5.09-5.29)        | 5.78 (5.44-6.10)                | 5.65 (5.28-6.03)  | 5.81 (5.49-6.12)    | 5.75 (5.41-6.08)  |
| Variation in work                | 5.80 (5.65-5.95)        | 5.60 (5.45-5.75)        | 5.40 (5.30-5.50)        | 5.25 (5.16-5.34)        | 5.30 (5.00-5.60)                | 5.16 (4.82-5.51)  | 5.76 (5.48-6.05)    | 5.50 (5.19-5.80)  |
| Colleagues and fellow workers    | 5.90 (5.76-6.05)        | 5.73 (5.58-5.87)        | 5.56 (5.47-5.65)        | 5.69 (5.60-5.77)        | 5.63 (5.34-5.91)                | 5.46 (5.13-5.79)  | 5.44 (5.18-5.71)    | 5.49 (5.19-5.78)  |
| Physical working conditions      | 5.60 (5.43-5.77)        | 5.47 (5.31-5.64)        | 4.81 (4.70-4.92)        | 4.77 (4.67-4.87)        | 5.52 (5.18-5.86)                | 5.32 (4.95-5.69)  | 4.76 (4.44-5.09)    | 5.15 (4.82-5.48)  |
| Opportunities to use abilities   | 5.90 (5.75-6.05)        | 5.62 (5.47-5.77)        | 5.46 (5.36-5.56)        | 5.36 (5.28-5.45)        | <b>5.79 (5.50-6.09)</b>         | 5.74 (5.40-6.08)  | 6.10 (5.82-6.38)    | 5.93 (5.62-6.23)  |
| Overall job satisfaction         | <b>5.88 (5.74-6.01)</b> | <b>5.49 (5.35-5.63)</b> | 5.51 (5.42-5.60)        | 5.40 (5.32-5.48)        | 5.94 (5.66-6.21)                | 5.86 (5.55-6.17)  | 5.84 (5.58-6.10)    | 5.78 (5.50-6.06)  |
| Freedom to choose method of work | <b>5.66 (5.50-5.82)</b> | <b>5.34 (5.18-5.49)</b> | <b>4.97 (4.87-5.07)</b> | <b>4.67 (4.58-4.76)</b> | 5.90 (5.59-6.22)                | 5.70 (5.35-6.05)  | 5.73 (5.43-6.03)    | 5.67 (5.36-5.99)  |
| Recognition for good work        | <b>5.38 (5.20-5.55)</b> | <b>4.83 (4.66-5.01)</b> | <b>4.82 (4.71-4.94)</b> | <b>4.59 (4.49-4.69)</b> | 5.50 (5.14-5.85)                | 5.41 (5.01-5.81)  | 5.26 (4.92-5.59)    | 5.20 (4.84-5.55)  |
| Rate of pay                      | <b>5.40 (5.23-5.57)</b> | <b>4.92 (4.75-5.09)</b> | <b>4.94 (4.83-5.05)</b> | <b>4.68 (4.58-4.77)</b> | 5.66 (5.32-6.00)                | 5.67 (5.29-6.04)  | 3.94 (3.62-4.27)    | 4.51 (4.17-4.85)  |
| Work hours                       | <b>4.56 (4.37-4.74)</b> | <b>4.00 (3.82-4.18)</b> | <b>4.61 (4.49-4.73)</b> | <b>4.38 (4.27-4.48)</b> | 5.41 (5.04-5.78)                | 5.34 (4.93-5.75)  | 4.86 (4.50-5.21)    | 5.49 (5.13-5.86)  |
| JSS                              | <b>5.54 (5.43-5.65)</b> | <b>5.17 (5.07-5.28)</b> | <b>5.14 (5.07-5.21)</b> | <b>5.00 (4.94-5.06)</b> | 5.64 (5.42-5.86)                | 5.53 (5.29-5.77)  | 5.35 (5.14-5.56)    | 5.45 (5.23-5.66)  |

**Table 3 GLM on estimated means, controlled for gender and age, of the ten JSS items (each scored from 1 to 7) among doctors in different type of work in the longitudinal sample in 2010 and 2016-17. Statistically significant differences (95% CI do not overlap) are in bold**

|                                  | General practitioners |                         | Specialists in private practice |                   | Doctors in hospital |                    |
|----------------------------------|-----------------------|-------------------------|---------------------------------|-------------------|---------------------|--------------------|
|                                  | means (95 % CI)       |                         | means (95 % CI)                 |                   | means (95 % CI)     |                    |
| <b>Satisfied with ....</b>       | 2010<br>(n=94)        | 2016-17<br>(n=94)       | 2010<br>(n=22)                  | 2016-17<br>(n=22) | 2010<br>(n=233)     | 2016-17<br>(n=233) |
| Amount of responsibility given   | 5.35 (5.09-5.61)      | <b>4.87 (4.57-5.18)</b> | 5.35 (5.20-5.50)                | 5.21 (5.03-5.39)  | 5.96 (5.55-6.36)    | 5.82 (5.18-6.46)   |
| Variation in work                | 5.84 (5.61-6.07)      | 5.92 (5.73-6.10)        | 5.41 (5.27-5.55)                | 5.44 (5.29-5.59)  | 5.05 (4.91-5.48)    | 5.27 (4.72-5.83)   |
| Colleagues and fellow workers    | 5.95 (5.74-6.16)      | 5.87 (5.67-6.08)        | 5.63 (5.50-5.77)                | 5.58 (5.54-5.82)  | 5.73 (5.32-6.13)    | 5.68 (4.99-6.37)   |
| Physical working conditions      | 5.68 (5.46-5.90)      | 5.70 (5.48-5.93)        | 4.75 (4.58-4.92)                | 4.90 (4.73-5.06)  | 5.86 (5.38-6.35)    | 5.91 (5.35-6.47)   |
| Opportunities to use abilities   | 5.87 (5.65-6.10)      | 6.03 (5.85-6.21)        | 5.52 (5.38-5.65)                | 5.56 (5.40-5.71)  | 5.77 (5.42-6.12)    | 6.14 (5.53-6.74)   |
| Overall job satisfaction         | 5.95 (5.77-6.13)      | 5.70 (5.51-5.90)        | 6.05 (5.70-6.40)                | 5.96 (5.35-6.56)  | 5.54 (5.42-5.66)    | 5.44 (5.30-5.58)   |
| Freedom to choose method of work | 5.75 (5.55-5.95)      | 5.48 (5.27-5.69)        | 6.05 (5.63-6.46)                | 5.91 (5.30-6.52)  | 4.98 (4.82-5.14)    | 4.96 (4.80-5.13)   |
| Recognition for good work        | 5.40 (5.16-5.65)      | 5.15 (4.89-5.41)        | 5.50 (5.09-5.92)                | 5.77 (5.20-6.34)  | 4.91 (4.74-5.09)    | 4.79 (4.61-4.98)   |
| Rate of pay                      | 5.47 (5.24-5.70)      | 5.16 (4.90-5.42)        | 5.91 (5.52-6.30)                | 6.00 (5.44-6.56)  | 4.97 (4.79-5.14)    | 4.90 (4.74-5.06)   |
| Work hours                       | 4.49 (4.19-4.79)      | 3.92 (3.59-4.24)        | 5.46 (4.89-6.02)                | 5.63 (5.04-6.24)  | 4.52 (4.34-4.70)    | 4.48 (4.30-4.76)   |
| <b>JSS</b>                       | 5.58 (5.42-5.73)      | 5.38 (5.23-5.53)        | 5.73 (5.52-5.95)                | 5.81 (5.32-6.30)  | 5.16 (5.06-5.26)    | 5.14 (5.03-5.25)   |

## References

1. Bakotic D. Relationship between job satisfaction and organisational performance. *Economic Research-Ekonomska Istraživanja* 2016;29(1):118-30.
2. Jaarsveld DV, Keyser E. The Moderating Role of Job Satisfaction on Workplace Absenteeism and Substance use amongst the Employees at a Power Utility in Mpumalanga. *Journal of Economics and Behavioral Studies* 2018(2):219-30.
3. Scanlan JN, Still M. Relationships between burnout, turnover intention, job satisfaction, job demands and job resources for mental health personnel in an Australian mental health service. *BMC health services research* 2019;19(1):62-62.
4. Coetzee N, Maree DJ, Smit BN. The relationship between chronic fatigue syndrome, burnout, job satisfaction, social support and age among academics at a tertiary institution. *International Journal of Occupational Medicine and Environmental Health* 2019;32(1):75-85.
5. Faragher EB, Cass M, Cooper CL. The relationship between job satisfaction and health: a meta-analysis. *Occupational and environmental medicine* 2005;62(2):105-12.
6. Warr P, Cook J, Wall T. Scales for the measurement of some work attitudes and aspects of psychological well-being. *Journal of Occupational Psychology* 1979;2(52):129-48.
7. Wallace JE, Lemaire JB, Ghali WA. Physician wellness: a missing quality indicator. *Lancet* 2009;374(9702):1714-21.
8. Shanafelt TD, Noseworthy JH. Executive Leadership and Physician Well-being. *Mayo Clinic Proceedings* 2017;92(1):129-46.
9. Wallace JE, Lemaire J. Physician well being and quality of patient care: an exploratory study of the missing link. *Psychol Health Med* 2009;14(5):545-52.
10. Firth-Cozens J. Interventions to improve physicians' well-being and patient care. *Soc Sci Med* 2001;52(2):223-5.
11. Friedberg M, Chen P, Van Busum K, et al. Factors Affecting Physician Professional Satisfaction and Their Implications for Patient Care, Health Systems, and Health Policy Santa Monica: RAND Corporation, 2013.
12. Casalino L, Crosson F. Physician Satisfaction and Physician Well-Being: Should Anyone Care? *Professions and Professionalism* 2015;5(1):1-12.
13. Angerer P, Weigl M. Physicians' psychosocial work conditions and quality of care: A literature review. *Professions and Professionalism* 2015;5(1):1-20.
14. McKinlay J, Marceau L. New wine in an old bottle: does alienation provide an explanation of the origins of physician discontent? *International Journal of Health Services* 2011;41 (2):301-35.
15. Murray A, Montgomery JE, Chang H, et al. Doctor Discontent. *Journal of General Internal Medicine* 2001;16(7):452-59.
16. Sturm R. Effect of managed care and financing on practice constraints and career satisfaction in primary care. *J Am Board Fam Pract* 2002;15(5):367-77.
17. Linzer M, Konrad TR, Douglas J, et al. Managed Care, Time Pressure, and Physician Job Satisfaction: Results from the Physician Worklife Study. *Journal of General Internal Medicine* 2000;15(7):441-50.
18. Landon BE, Reschovsky J, Blumenthal D. Changes in career satisfaction among primary care and specialist physicians, 1997–2001. *JAMA* 2003;289.
19. Tyssen R, Palmer KS, Solberg IB, et al. Physicians' perceptions of quality of care, professional autonomy, and job satisfaction in Canada, Norway, and the United States. *BMC Health Services Research* 2013;13(1):516.
20. Nylenna M, Gulbrandsen P, Førde R, et al. Unhappy doctors? A longitudinal study of life and job satisfaction among Norwegian doctors 1994-2002. *BMC Health Services Research* 2005;5:44.
21. Aasland OG, Rosta J, Nylenna M. Healthcare reforms and job satisfaction among doctors in Norway. *Scandinavian Journal of Public Health* 2010;38(3):253-8.
22. Nylenna M, Aasland OG. Jobbtilfredshet blant norske leger [Job satisfaction among Norwegian doctors]. *Tidsskrift for Den norske legeforening* 2010;130(10):1028-31.
23. Surman G, Goldacre MJ, Lambert TW. UK-trained junior doctors' intentions to work in UK medicine: questionnaire surveys, three years after graduation. *Journal of the Royal Society of Medicine* 2017;110(12):493-500.

- 1 24. Crosson F, Casalino L. Physician Dissatisfaction in the United States: An Examination.  
2 *Professions and Professionalism* 2015;5(1):1-12.
- 3 25. Gibson J, Sutton M, Spooner S, et al. Ninth National GP Worklife Survey 2017. Manchester:  
4 University of Manchester. [http://blogs.lshtm.ac.uk/prucomm/files/2018/05/Ninth-National-](http://blogs.lshtm.ac.uk/prucomm/files/2018/05/Ninth-National-GP-Worklife-Survey.pdf)  
5 [GP-Worklife-Survey.pdf](http://blogs.lshtm.ac.uk/prucomm/files/2018/05/Ninth-National-GP-Worklife-Survey.pdf).
- 6 26. Pedersen Fischer A, Busk Nørøxe K, Bro F, et al. Alment praktiserende lægers psykiske  
7 arbejdsmiljø og jobtilfredshed 2016 (General Practitioners' psychological work environment  
8 and job satisfaction 2016). Aarhus: Forskningsenheden for Almen Praksis-Aarhus Universitet,  
9 2016.
- 10 27. Scott A. General practice trends. Melbourne: ANZ-Melbourne Institute Health Sector, 2017.  
11 [https://mabel.org.au/\\_\\_data/assets/pdf\\_file/0005/2334551/ANZ-MI-Health-Sector-Report.pdf](https://mabel.org.au/__data/assets/pdf_file/0005/2334551/ANZ-MI-Health-Sector-Report.pdf).
- 12 28. Rosta J, Nylenna M, Aasland OG. Job satisfaction among hospital doctors in Norway and  
13 Germany. A comparative study on national samples. *Scandinavian Journal of Public Health*  
14 2009;37(5):503-8.
- 15 29. Voltmer E, Rosta J, Siegrist J, et al. Job stress and job satisfaction of physicians in private practice:  
16 comparison of German and Norwegian physicians. *International Archives of Occupational*  
17 *and Environmental Health* 2012;85(7):819-28.
- 18 30. Solberg IB, Tómasson K, Aasland O, et al. Cross-national comparison of job satisfaction in  
19 doctors during economic recession. *Occup Med (Lond)* 2014;64(8):595-600.
- 20 31. Steihaug S, Paulsen B, Melby L. Norwegian general practitioners' collaboration with municipal  
21 care providers – a qualitative study of structural conditions. *Scandinavian Journal of Primary*  
22 *Health Care* 2017;35(4):344-51.
- 23 32. Ringard Å, Sagan A, Sperre Saunes I, et al. Norway: Health system review. *Health Systems in*  
24 *Transition* 2013;15(8):1-162.
- 25 33. Kjosavik SR. Ongoing recruitment crisis In Norwegian general practice. *Scandinavian Journal of*  
26 *Primary Health Care* 2018;36(2):107-08.
- 27 34. Ringard Å, Saunes IS, Sagan A. The 2015 hospital treatment choice reform in Norway: Continuity  
28 or change? *Health Policy* 2016;120(4):350-55.
- 29 35. Norwegian-Ministry-of-Health-and-Care-Service. Fremtidens primærhelsetjeneste – nærhet og  
30 helhet (The future primary care – proximity and comprehensiveness). Oslo: Norwegian  
31 Ministry of Health and Care Services, 2015.
- 32 36. Ramboll. Spørreskjemaundersøkelse - sykehuslegers arbeidsforhold 2018 (Survey on hospital  
33 doctors working conditions 2018).  
34 <https://www.dagensmedisin.no/contentassets/b79cfab99ba6437bb3ccf9efa9ad75aa/sporreunde>  
35 [rsokelse-om-sykehuslegers-arbeidsforhold-2018.pdf](https://www.dagensmedisin.no/contentassets/b79cfab99ba6437bb3ccf9efa9ad75aa/sporreunde).
- 36 37. Tronderopprøret. Trønderopprørets fastlegeundersøkelse og helsemedarbeiderundersøkelse  
37 (Survey on GPs and health workers) Trondheim, 2018. [http://www.flo20.no/wp-](http://www.flo20.no/wp-content/uploads/2018/06/TOundersokelse-2.pdf)  
38 [content/uploads/2018/06/TOundersøkelse-2.pdf](http://www.flo20.no/wp-content/uploads/2018/06/TOundersokelse-2.pdf).
- 39 38. Hora GPR, Ribas Júnior R, Souza MAd. State of the Art of Job Satisfaction Measures: A  
40 Systematic Review. *Trends in Psychology* 2018;26:971-86.
- 41 39. Konrad T. Measures, Methods, and Models of Doctor Satisfaction: Future Research Challenges.  
42 *Professions and Professionalism* 2015;5(1):1-16.
- 43 40. Cooper CL, Rout U, Faragher B. Mental health, job satisfaction, and job stress among general  
44 practitioners. *BMJ* 1989;298(6670):366-70.
- 45 41. Rosta J, Gerber A. Job satisfaction of hospital doctors. Results of a study of a national sample of  
46 hospital doctors in Germany. *Gesundheitswesen* 2008;70(8-9):519-24.
- 47 42. Goetz K, Campbell SM, Steinhäuser J, et al. Evaluation of job satisfaction of practice staff and  
48 general practitioners: an exploratory study. *BMC Family Practice* 2011;12(1):137.
- 49 43. Rosta J, Aasland OG. Weekly working hours for Norwegian hospital doctors since 1994 with  
50 special attention to postgraduate training, work-home balance and the European Working  
51 Time Directive: a panel study. *BMJ Open* 2014;4(10) .
- 52 44. Rosta J., Aasland OG. Doctors' working hours and time spent on patient care in the period 1994 -  
53 2014. *Tidsskrift for Den norske legeforening* 2016;136(16):1355-9.
- 54 45. Hills D, Joyce C, Humphreys J. Validation of a Job Satisfaction Scale in the Australian Clinical  
55 Medical Workforce. *Evaluation & the Health Professions* 2012;35(1):47-76.

- 1 46. Falkum E. Psychosocial Work-Environment and Job Satisfaction. In: Larsen Ø, ed. The shaping of  
2 a profession Physicians in Norway, Past and Present. Canton: Science History Publications  
3 1996:481-90.
- 4 47. Finset KB, Gude T, Hem E, et al. Which young physicians are satisfied with their work? A  
5 prospective nationwide study in Norway. *BMC Medical Education* 2005;5(1):19.
- 6 48. Schmit Jongbloed L. Physician job satisfaction in the Netherlands. Groningen: University of  
7 Groningen, 2017.
- 8 49. Surman G, Lambert TW, Goldacre M. Doctors' enjoyment of their work and satisfaction with time  
9 available for leisure: UK time trend questionnaire-based study. *Postgraduate Medical Journal*  
10 2016;92(1086):194-200.
- 11 50. Perina DG, Marco CA, Smith-Coggins R, et al. Well-Being among Emergency Medicine Resident  
12 Physicians: Results from the ABEM Longitudinal Study of Emergency Medicine Residents.  
13 *Journal of Emergency Medicine* 2018;55(1):101-09.e2.
- 14 51. Malhotra J, Wong E, Thind A. Canadian family physician job satisfaction - is it changing in an  
15 evolving practice environment? An analysis of the 2013 National Physician Survey database.  
16 *BMC Family Practice* 2018;19(1):100.
- 17 52. Behmann M, Schmiemann G, Lingner H, et al. Job Satisfaction Among Primary Care Physicians:  
18 Results of a Survey. *Deutsches Ärzteblatt International* 2012;109(11):193-200.(11):193-200.
- 19 53. Joyce C, Schurer S, Scott A, et al. Australian doctors' satisfaction with their work: results from the  
20 MABEL longitudinal survey of doctors. *Med J Aust* 2011;194(1):30-33.
- 21 54. Domagala A, Bała MM, Storman D, et al. Factors Associated with Satisfaction of Hospital  
22 Physicians: A Systematic Review on European Data. *International journal of environmental*  
23 *research and public health* 2018;15(11):2546.
- 24 55. NOA. Jobbtilfredshet (Job satisfaction) Oslo: NOA (Nasjonal overvåking av arbeidsmiljø), 2016.  
25 <https://noa.stami.no/arbeidsmiljoindikatorer/psykososialtorganisasjonsrisiko/jobbtilfredshet1/tilfredshet/>.
- 26 56. Førde R, Aasland O. Moralsk stress og faglig ytringsfrihet blant leger (Moral distress and  
27 professional freedom of speech among doctors). *Tidsskrift for Den norske legeforening*  
28 2013;12-13(133):1310-13.
- 29 57. Stoddard JJ, Hargraves JL, Reed M, et al. Managed care, professional autonomy, and income:  
30 effects on physician career satisfaction. *J Gen Intern Med* 2001;16(10):675-84.
- 31 58. Dugdale D, Epstein R, Pantilat S. Time and the patient-physician relationship. *Journal of General*  
32 *Internal Medicine* 1999(Suppl. 1):S34-40.
- 33 59. Bovier P, Perneger T. Predictors of work satisfaction among physicians. *European Journal of*  
34 *Public Health* 2003;13(4):299-305.
- 35 60. Rebnord IK, Eikeland OJ, Hunskaar S, et al. Fastlegers tidsbruk (GPs working time). Bergen:  
36 Nasjonalt kompetansesenter for legevaktmedisin, Uni Research Helse, 2018.
- 37 61. Lehn H. Utvikling i bruk av fastlege og legevakt: Analysenotat i Samdata kommune (Development  
38 in the use of GP-service and emergency medical service). Oslo: Helsedirektoratet, 2018.
- 39 62. Hertzberg K, Skirbekk H, Tyssen R, et al. Den gode legen - sterk og utholdende. (The good doctor  
40 - strong and persevering). *Tidsskrift for Den norske legeforening* 2016;136(19):1631-4.
- 41 63. Hertzberg T, Skirbekk H, Tyssen R, et al. Dagens sykehuslege - fremdeles alltid på vakt (The  
42 hospital doctor of today - still continuously on duty). *Tidsskrift for Den norske legeforening*  
43 2016;136(19):1635-8.
- 44 64. Richardsen A, Burke R. Occupational stress and job satisfaction among physicians: sex  
45 differences. *Soc Sci Med* 1991;33(10):1179-87.
- 46 65. Gravelle H, Hole A, Hossain M. Response bias in job satisfaction surveys: English general  
47 practitioners York: Department of Economics and Related Studies University of York  
48 Heslington, 2008.
- 49 66. Layard R. Happiness. Lessons from a new science. . London: Penguin 2005.
- 50 67. Eason CM, Mazerolle SM, Monsma EV, et al. The Role of Personality in Job Satisfaction Among  
51 Collegiate Athletic Trainers. *J Athl Train* 2015;50(12):1247-55.
- 52 68. Arbeidsdepartementet. Lov om arbeidsmiljø, arbeidstid og stillingsvern - LOV 2005-06-17 nr 62  
53 (Law on working environment, working time and employment protection). Oslo:  
54 Arbeidsdepartementet, 2005.
- 55

- 1  
2  
3 1 69. EU. European Health and Safety Legislation. Article 153 of the Treaty on the Functioning of the  
4 2 European Union: European Union, 1989.  
5 3 70. Landon B, Reschovsky J, Pham H, et al. Leaving medicine: the consequences of physician  
6 4 dissatisfaction. *Med Care* 2009;44(3):234-42.  
7 5 71. Nilsen L. Mange innbyggere har ikke fastlege (Many citizens do not have GP). *Dagens medisin*.  
8 6 Oslo, 2016.  
9 7 72. Korsvold L, Tønnessen C, Sirnes E, et al. Leger i kommune- og spesialisthelsetjenesten (Doctors  
10 8 in municipal and specialist health service). Oslo: Helsedirektoratet, 2017.  
11 9 73. Gaski M, Abelsen B. Fastlegetjenesten i Nord-Norge (GP service in northern Norway). Tromsø:  
12 10 NSDM, 2018.  
13 11  
14  
15  
16  
17  
18  
19  
20  
21  
22  
23  
24  
25  
26  
27  
28  
29  
30  
31  
32  
33  
34  
35  
36  
37  
38  
39  
40  
41  
42  
43  
44  
45  
46  
47  
48  
49  
50  
51  
52  
53  
54  
55  
56  
57  
58  
59  
60

For peer review only

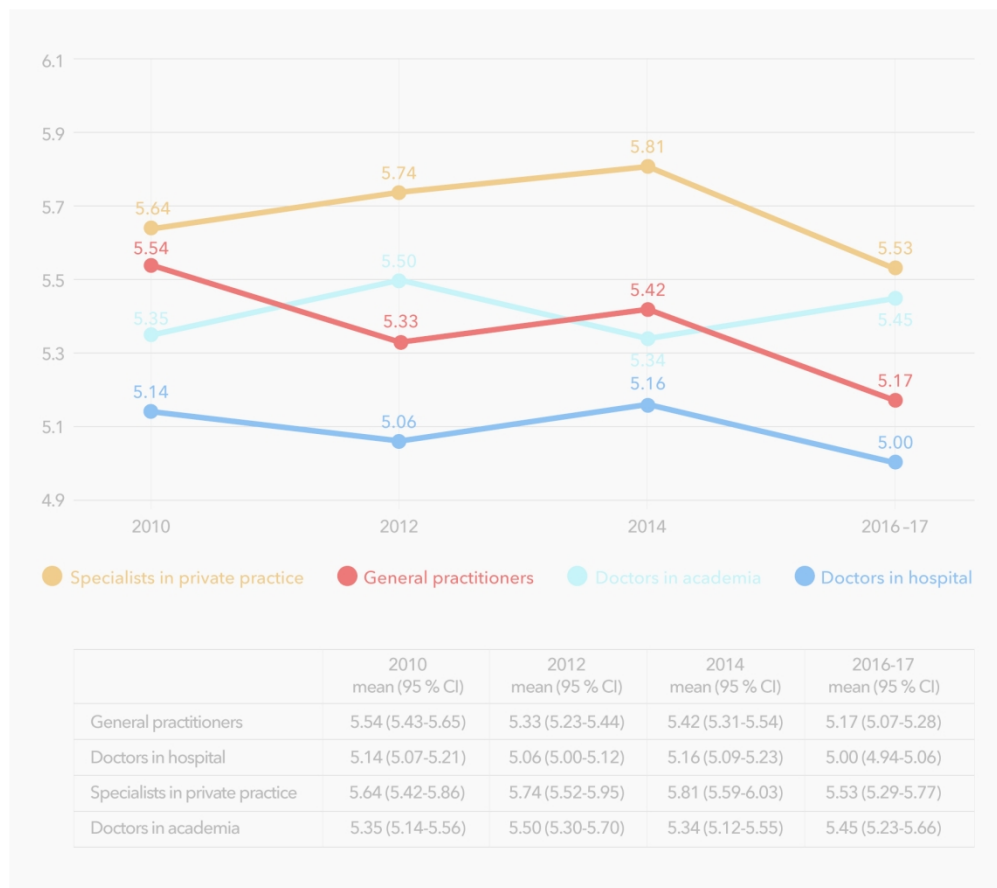

GLM estimated means of job satisfaction (scored from 1 to 7) controlled for age and gender among doctors in different job positions in 2010, 2012, 2014 and 2016-17



1  
2  
3  
4  
5  
6  
7  
8  
9  
10  
11  
12  
13  
14  
15  
16  
17  
18  
19  
20  
21  
22  
23  
24  
25  
26  
27  
28  
29  
30  
31  
32  
33  
34  
35  
36  
37  
38  
39  
40  
41  
42  
43  
44  
45  
46  
47  
48  
49  
50  
51  
52  
53  
54  
55  
56  
57  
58  
59  
60

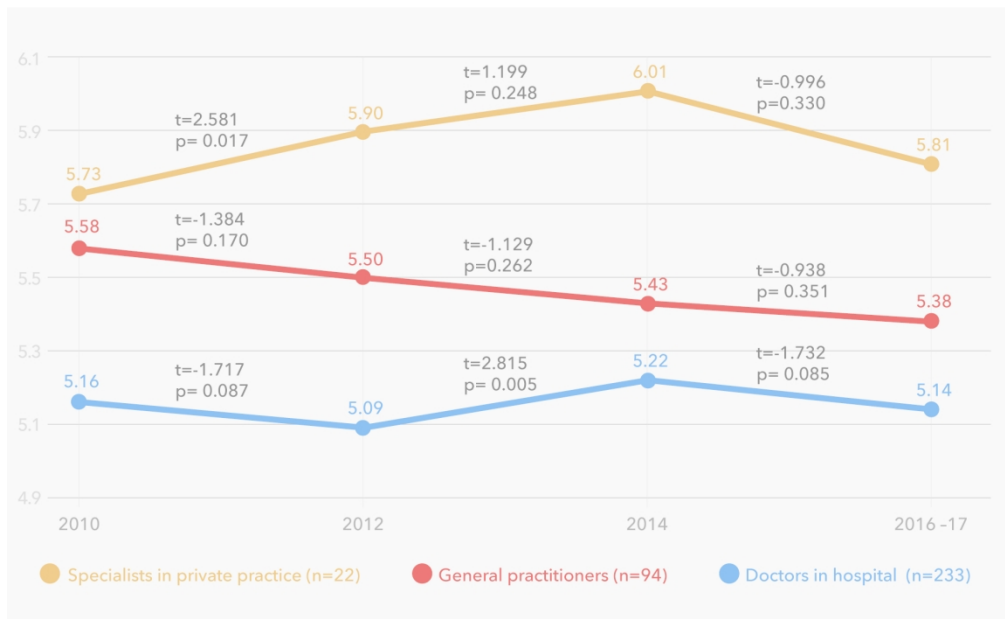

GLM estimated means of job satisfaction (scored from 1 to 7) controlled for age and gender among doctors in different job positions in 2010, 2012, 2014 and 2016-17 with paired t-tests (the longitudinal subsample)

**STROBE 2007 (v4) checklist of items to be included in reports of observational studies in epidemiology\***  
**Checklist for cohort, case-control, and cross-sectional studies (combined)**

Manuscript ID bmjopen-2018-027891: Changes in job satisfaction among doctors in Norway from 2010 to 2017. A study based on repeated surveys

Judith ROSTA, Olaf G. AASLAND, Magne NYLENNA

| Section/Topic             | Item # | Recommendation                                                                                                                                                                                                                                                                                                                                                                                                                                                         | Reported on page # |
|---------------------------|--------|------------------------------------------------------------------------------------------------------------------------------------------------------------------------------------------------------------------------------------------------------------------------------------------------------------------------------------------------------------------------------------------------------------------------------------------------------------------------|--------------------|
| Title and abstract        | 1      | (a) Indicate the study's design with a commonly used term in the title or the abstract                                                                                                                                                                                                                                                                                                                                                                                 | 1-2                |
|                           |        | (b) Provide in the abstract an informative and balanced summary of what was done and what was found                                                                                                                                                                                                                                                                                                                                                                    | 2                  |
| <b>Introduction</b>       |        |                                                                                                                                                                                                                                                                                                                                                                                                                                                                        |                    |
| Background/rationale      | 2      | Explain the scientific background and rationale for the investigation being reported                                                                                                                                                                                                                                                                                                                                                                                   | 4-5                |
| Objectives                | 3      | State specific objectives, including any pre-specified hypotheses                                                                                                                                                                                                                                                                                                                                                                                                      | 5                  |
| <b>Methods</b>            |        |                                                                                                                                                                                                                                                                                                                                                                                                                                                                        |                    |
| Study design              | 4      | Present key elements of study design early in the paper                                                                                                                                                                                                                                                                                                                                                                                                                | 6                  |
| Setting                   | 5      | Describe the setting, locations, and relevant dates, including periods of recruitment, exposure, follow-up, and data collection                                                                                                                                                                                                                                                                                                                                        | 6                  |
| Participants              | 6      | (a) <i>Cohort study</i> —Give the eligibility criteria, and the sources and methods of selection of participants. Describe methods of follow-up<br><i>Case-control study</i> —Give the eligibility criteria, and the sources and methods of case ascertainment and control selection. Give the rationale for the choice of cases and controls<br><i>Cross-sectional study</i> —Give the eligibility criteria, and the sources and methods of selection of participants | 6                  |
|                           |        | (b) <i>Cohort study</i> —For matched studies, give matching criteria and number of exposed and unexposed<br><i>Case-control study</i> —For matched studies, give matching criteria and the number of controls per case                                                                                                                                                                                                                                                 | N/A                |
| Variables                 | 7      | Clearly define all outcomes, exposures, predictors, potential confounders, and effect modifiers. Give diagnostic criteria, if applicable                                                                                                                                                                                                                                                                                                                               | 7-9                |
| Data sources/ measurement | 8*     | For each variable of interest, give sources of data and details of methods of assessment (measurement). Describe comparability of assessment methods if there is more than one group                                                                                                                                                                                                                                                                                   | 7-9                |
| Bias                      | 9      | Describe any efforts to address potential sources of bias                                                                                                                                                                                                                                                                                                                                                                                                              | 17                 |
| Study size                | 10     | Explain how the study size was arrived at                                                                                                                                                                                                                                                                                                                                                                                                                              | 6 and Table 1      |
| Quantitative variables    | 11     | Explain how quantitative variables were handled in the analyses. If applicable, describe which groupings were chosen and why                                                                                                                                                                                                                                                                                                                                           | 9                  |
| Statistical methods       | 12     | (a) Describe all statistical methods, including those used to control for confounding                                                                                                                                                                                                                                                                                                                                                                                  | 9                  |
|                           |        | (b) Describe any methods used to examine subgroups and interactions                                                                                                                                                                                                                                                                                                                                                                                                    | 9                  |
|                           |        | (c) Explain how missing data were addressed                                                                                                                                                                                                                                                                                                                                                                                                                            | 9                  |

|                          |     |                                                                                                                                                                                                                                                                                                                                                                                                               |                                      |
|--------------------------|-----|---------------------------------------------------------------------------------------------------------------------------------------------------------------------------------------------------------------------------------------------------------------------------------------------------------------------------------------------------------------------------------------------------------------|--------------------------------------|
|                          |     | (d) <i>Cohort study</i> —If applicable, explain how loss to follow-up was addressed<br><i>Case-control study</i> —If applicable, explain how matching of cases and controls was addressed<br><i>Cross-sectional study</i> —If applicable, describe analytical methods taking account of sampling strategy                                                                                                     | N/A                                  |
|                          |     | (e) Describe any sensitivity analyses                                                                                                                                                                                                                                                                                                                                                                         | N/A                                  |
| <b>Results</b>           |     |                                                                                                                                                                                                                                                                                                                                                                                                               |                                      |
| Participants             | 13* | (a) Report numbers of individuals at each stage of study—eg numbers potentially eligible, examined for eligibility, confirmed eligible, included in the study, completing follow-up, and analysed<br>(b) Give reasons for non-participation at each stage<br>(c) Consider use of a flow diagram                                                                                                               | 10 and Table 1                       |
|                          |     | (a) Give characteristics of study participants (eg demographic, clinical, social) and information on exposures and potential confounders<br>(b) Indicate number of participants with missing data for each variable of interest<br>(c) <i>Cohort study</i> —Summarise follow-up time (eg, average and total amount)                                                                                           | 10 and Table 1                       |
| Descriptive data         | 14* |                                                                                                                                                                                                                                                                                                                                                                                                               | N/A                                  |
|                          |     |                                                                                                                                                                                                                                                                                                                                                                                                               | 10                                   |
|                          |     |                                                                                                                                                                                                                                                                                                                                                                                                               | 10 and Table 1                       |
|                          |     |                                                                                                                                                                                                                                                                                                                                                                                                               | N/A                                  |
| Outcome data             | 15* | <i>Cohort study</i> —Report numbers of outcome events or summary measures over time<br><i>Case-control study</i> —Report numbers in each exposure category, or summary measures of exposure<br><i>Cross-sectional study</i> —Report numbers of outcome events or summary measures                                                                                                                             | N/A                                  |
|                          |     |                                                                                                                                                                                                                                                                                                                                                                                                               | N/A                                  |
|                          |     |                                                                                                                                                                                                                                                                                                                                                                                                               | 11                                   |
| Main results             | 16  | (a) Give unadjusted estimates and, if applicable, confounder-adjusted estimates and their precision (eg, 95% confidence interval). Make clear which confounders were adjusted for and why they were included<br>(b) Report category boundaries when continuous variables were categorized<br>(c) If relevant, consider translating estimates of relative risk into absolute risk for a meaningful time period | 11-12 and Figure 1, 2 and Table 2, 3 |
|                          |     |                                                                                                                                                                                                                                                                                                                                                                                                               | N/A                                  |
|                          |     |                                                                                                                                                                                                                                                                                                                                                                                                               | N/A                                  |
| Other analyses           | 17  | Report other analyses done—eg analyses of subgroups and interactions, and sensitivity analyses                                                                                                                                                                                                                                                                                                                | 11-12 and Table 2, 3                 |
| <b>Discussion</b>        |     |                                                                                                                                                                                                                                                                                                                                                                                                               |                                      |
| Key results              | 18  | Summarise key results with reference to study objectives                                                                                                                                                                                                                                                                                                                                                      | 13                                   |
| Limitations              | 19  | Discuss limitations of the study, taking into account sources of potential bias or imprecision. Discuss both direction and magnitude of any potential bias                                                                                                                                                                                                                                                    | 17                                   |
| Interpretation           | 20  | Give a cautious overall interpretation of results considering objectives, limitations, multiplicity of analyses, results from similar studies, and other relevant evidence                                                                                                                                                                                                                                    | 15-17                                |
| Generalisability         | 21  | Discuss the generalisability (external validity) of the study results                                                                                                                                                                                                                                                                                                                                         | 13-15                                |
| <b>Other information</b> |     |                                                                                                                                                                                                                                                                                                                                                                                                               |                                      |
| Funding                  | 22  | Give the source of funding and the role of the funders for the present study and, if applicable, for the original study on which the present article is based                                                                                                                                                                                                                                                 | N/A                                  |

\*Give information separately for cases and controls in case-control studies and, if applicable, for exposed and unexposed groups in cohort and cross-sectional studies.

**Note:** An Explanation and Elaboration article discusses each checklist item and gives methodological background and published examples of transparent reporting. The STROBE checklist is best used in conjunction with this article (freely available on the Web sites of PLoS Medicine at <http://www.plosmedicine.org/>, Annals of Internal Medicine at <http://www.annals.org/>, and Epidemiology at <http://www.epidem.com/>). Information on the STROBE Initiative is available at [www.strobe-statement.org](http://www.strobe-statement.org).
